# Supplementary material for: Photoelectrocatalyzed undirected C–H trifluoromethylation of arenes: catalyst evaluation and scope
Source: Royal Society of Chemistry journal article supplement (doi:10.1039/d3fd00076a), 2023-01-01

Supporting Information

## **Photoelectro-Catalyzed Undirected C–H Trifluoromethylation of Arenes: Catalyst Evaluation and Scope**

Julia Struwe, and Lutz Ackermann\*

Institut für Organische und Biomolekulare Chemie, Georg-August-Universität Göttingen,  
Tammannstraße 2, 37077 Göttingen, Germany

Email: [Lutz.Ackermann@chemie.uni-goettingen.de](mailto:Lutz.Ackermann@chemie.uni-goettingen.de)

<https://www.ackermann.chemie.uni-goettingen.de/>

## Table of Contents

|                                                     |     |
|-----------------------------------------------------|-----|
| General Remarks                                     | S2  |
| General Procedure                                   | S3  |
| Screening of Various Catalysts                      | S4  |
| Comparison to Electrooxidative Trifluoromethylation | S6  |
| Kinetic Studies                                     | S7  |
| Characterization Data                               | S9  |
| References                                          | S19 |
| NMR Spectra                                         | S20 |

## General Remarks

Catalytic reactions were performed under an inert atmosphere of N<sub>2</sub> using pre-dried glassware and standard Schlenk techniques. Substrates, NaSO<sub>2</sub>CF<sub>3</sub>, Zn(SO<sub>2</sub>CF<sub>3</sub>)<sub>2</sub> and solvents were obtained from commercial sources and were used without further purification. Platinum electrodes (10 mm × 15 mm × 0.25 mm, 99.9%; obtained from ChemPur® Karlsruhe, Germany) and graphite felt electrodes (10 mm × 15 mm × 6 mm, SIGRACELL® GFA 6 EA, obtained from SGL Carbon, Wiesbaden, Germany) were connected using stainless steel adapters. Electrocatalysis was conducted using an AXIOMET AX-3003P potentiostat or a Metrohm MULTI AUTOLAB M204 potentiostat in two-electrode constant current mode. Yields refer to isolated compounds estimated to be >95% pure as determined by <sup>1</sup>H-NMR and GC. TLC was performed on Merck TLC Silica Gel 60 F<sub>254</sub> with detection under UV light at 254 nm. Chromatographic separations were carried out on Merck Geduran SI-60 (0.040–0.063 mm, 230–400 mesh ASTM). Recycling preparative HPLC system from Japan Analytical Industries (*LC-92XX II Series, UV and RI Detector*) connected to JAIGEL 2HH series column with HPLC grade chloroform were employed for purification. IR spectra were recorded on a Bruker FT-IR alpha-P device. ESI-MS was recorded on Bruker Daltonik *micrOTOF* and *maXis*. The ratios of mass to charge (*m/z*) are reported and the intensity relative to the base peak (*I* = 100) is given in parentheses. Melting points (m.p.) were measured on Stuart® melting point apparatus SMP3, values are uncorrected. Nuclear magnetic resonance (NMR) spectroscopy was performed at 300 or 400 MHz (<sup>1</sup>H-NMR), 75 or 100 MHz (<sup>13</sup>C-NMR, APT), and 282 or 377 MHz (<sup>19</sup>F-NMR) on Bruker *Avance III HD 300*, *Avance III 300*, *Avance III 400*, *Avance III HD 400*, *Avance Neo 400* instruments. Chemical shifts ( $\delta$ ) are provided in ppm and spectra referred to non-deuterated solvent signal.

## General Procedure for the Photoelectrochemical C–H Trifluoromethylation

The photoelectrocatalysis was carried out in an undivided cell with a GF anode (10 mm × 15 mm × 6 mm) and a Pt cathode (10 mm × 15 mm × 0.25 mm). Unless in case of volatile substrates, the (hetero-)arene (0.25 mmol, 1.0 equiv), NaSO<sub>2</sub>CF<sub>3</sub> (**2**, 78 mg, 0.50 mmol, 2.0 equiv), LiClO<sub>4</sub> (42 mg, 0.40 mmol) and the photocatalyst (2.0 or 5.0 mol %) were placed into a 10 mL Schlenkflask and closed with a stopper with integrated electrode holders. The vial was evacuated and purged with N<sub>2</sub> three times, before volatile compounds were added and the components were dissolved in CH<sub>3</sub>CN (4.0 mL) under N<sub>2</sub>. The photoelectrocatalysis was performed at ambient temperature with a constant current of 4.0 mA maintained for 8–16 h under visible light irradiation (2 × Kessil A360N or 2 × Kessil A160WE). After completion of the reaction time, the resulting mixture was transferred into a round bottom flask. The vial was rinsed carefully and the GF anode was washed with CH<sub>2</sub>Cl<sub>2</sub> (3 × 10 mL) in an ultrasonic bath. Evaporation of the solvent and subsequent column chromatography on silica gel afforded the corresponding products.

## Screening of Various Photoelectrocatalysts

**Table S1:** Comparison of different photoelectrocatalysts in the trifluoromethylation of arene **1**.

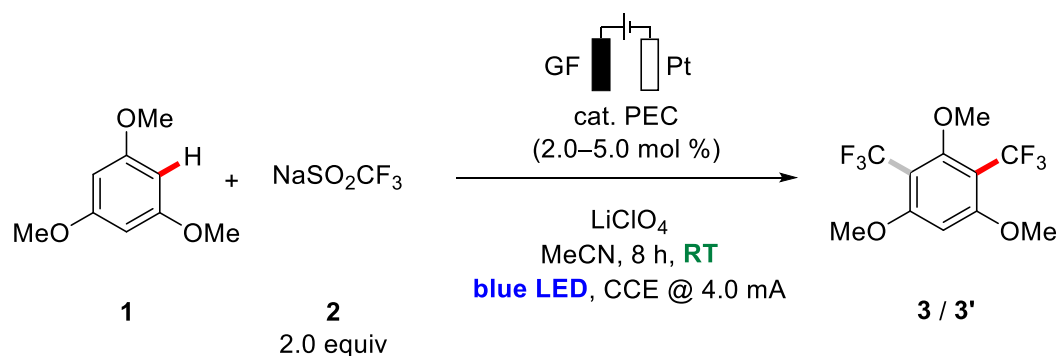

| Entry | Photoelectrocatalyst                                                                          | Conversion <sup>[a]</sup> | Ratio ( <b>3</b> : <b>3'</b> ) |
|-------|-----------------------------------------------------------------------------------------------|---------------------------|--------------------------------|
| 1     | [Mes-Acr]ClO <sub>4</sub>                                                                     | 95% (88%)                 | 4.9:1                          |
| 2     | TAC                                                                                           | 89% (87%)                 | 6.4:1                          |
| 3     | DDQ                                                                                           | 93%                       | 1.7:1                          |
| 4     | DCA                                                                                           | 96%                       | 5.0:1                          |
| 5     | DCN                                                                                           | 90%                       | 4.3:1                          |
| 6     | TBAI                                                                                          | 95%                       | 2.2:1                          |
| 7     | TBABr                                                                                         | 97%                       | 1.5:1                          |
| 8     | TBACl                                                                                         | 95%                       | 1.4:1                          |
| 9     | CeCl <sub>3</sub> ·7H <sub>2</sub> O                                                          | 90%                       | 3.5:1                          |
| 10    | CeCl <sub>3</sub> ·7H <sub>2</sub> O <sup>[b]</sup>                                           | 93%                       | 2.6:1                          |
| 11    | [Ru(bpy) <sub>3</sub> ](PF <sub>6</sub> ) <sub>2</sub> <sup>[c]</sup>                         | 91%                       | 3.3:1                          |
| 12    | [Ni(bpy) <sub>3</sub> ]Br <sub>2</sub> <sup>[c]</sup>                                         | 89%                       | 5.2:1                          |
| 13    | [Fe(bpy) <sub>3</sub> ](PF <sub>6</sub> ) <sub>2</sub> <sup>[c]</sup>                         | 87%                       | 3.8:1                          |
| 14    | ( <i>n</i> -Bu <sub>4</sub> N) <sub>4</sub> [W <sub>10</sub> O <sub>32</sub> ] <sup>[c]</sup> | 85%                       | 5.5:1                          |
| 15    | ---                                                                                           | 9%                        | ---                            |
| 16    | [Mes-Acr]ClO <sub>4</sub> <sup>[d]</sup>                                                      | 7%                        | ---                            |
| 17    | [Mes-Acr]ClO <sub>4</sub> <sup>[e]</sup>                                                      | 4%                        | ---                            |
| 18    | TBABr <sup>[d]</sup>                                                                          | 39%                       | 12.0:1                         |
| 19    | [Mes-Acr-ClO <sub>4</sub> ] <sup>[f]</sup>                                                    | 63%                       | 20:1                           |

<sup>[a]</sup> Reaction conditions: Undivided cell, GF anode (10 mm × 15 mm × 6 mm), Pt cathode (10 mm × 15 mm × 0.25 mm), constant current electrolysis at 4.0 mA. **1** (0.25 mmol), **2** (0.50 mmol), catalyst (5.0 mol %), LiClO<sub>4</sub> (0.1 M), MeCN (4.0 mL), 30–35 °C, 8 h, under N<sub>2</sub>, blue LEDs (450 nm); conversions were determined by <sup>1</sup>H-NMR using dimethyl terephthalate as internal standard. Yield in parenthesis refer to isolated yields. <sup>[b]</sup> 390 nm wavelength. <sup>[c]</sup> Photocatalyst (2.0 mol %). <sup>[d]</sup> In the dark under otherwise identical reaction conditions using aluminium foil to cover the vial. <sup>[e]</sup> In the absence of current. <sup>[f]</sup> Zn(SO<sub>2</sub>CF<sub>3</sub>)<sub>2</sub> (**4**, 0.25 mmol).

## Comparison to Electrooxidative Trifluoromethylation

Following the general procedure or the procedure for the electrooxidative trifluoromethylation described in the literature<sup>[1]</sup>, control experiments were conducted to compare the efficacy of the procedures for the different sulfinate sources  $\text{NaSO}_2\text{CF}_3$  (**2**) or  $\text{Zn}(\text{SO}_2\text{CF}_3)_2$  (**4**) by using caffeine (**5**, 0.25 mmol) as arene substrate. After 8 h, the conversion was determined by  $^{19}\text{F}$ -NMR using 1-fluorononane as internal standard.

**Table S2:** Influence of the irradiation with blue LED light on the trifluoromethylation of caffeine (**5**).

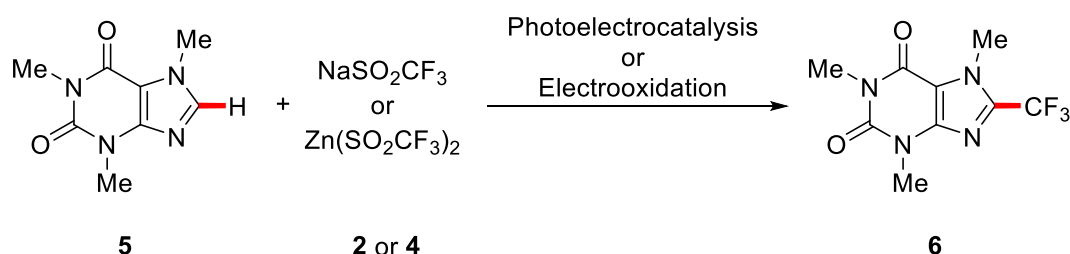

| Entry | Sulfinate                                          | Conditions                                      | Yield ( <b>6</b> ) |
|-------|----------------------------------------------------|-------------------------------------------------|--------------------|
| 1     | $\text{Zn}(\text{SO}_2\text{CF}_3)_2$ ( <b>4</b> ) | Electrooxidation, Undivided Cell <sup>[a]</sup> | (26%)              |
| 2     | $\text{Zn}(\text{SO}_2\text{CF}_3)_2$ ( <b>4</b> ) | Electrooxidation, Divided Cell <sup>[a]</sup>   | (64%)              |
| 3     | $\text{Zn}(\text{SO}_2\text{CF}_3)_2$ ( <b>4</b> ) | Photoelectrocatalysis <sup>[b]</sup>            | (80%)              |
| 4     | $\text{NaSO}_2\text{CF}_3$ ( <b>2</b> )            | Electrooxidation, Undivided Cell <sup>[a]</sup> | (21%)              |
| 5     | $\text{NaSO}_2\text{CF}_3$ ( <b>2</b> )            | Electrooxidation, Divided Cell <sup>[a]</sup>   | (33%)              |
| 6     | $\text{NaSO}_2\text{CF}_3$ ( <b>2</b> )            | Photoelectrocatalysis <sup>[b]</sup>            | 70% (81%)          |

Reaction conditions: <sup>[a]</sup> Divided cell or undivided cell, GF anode (10 mm × 15 mm × 6 mm), GF cathode (10 mm × 15 mm × 6 mm), constant current electrolysis at 4.0 mA. **5** (0.25 mmol), **2** (0.5 mmol) or **4** (0.35 mmol), *n*-Bu<sub>4</sub>NClO<sub>4</sub> (0.15 M), DMSO (5.0 mL), 8 h. <sup>[b]</sup> Undivided cell, GF anode (10 mm × 15 mm × 6 mm), Pt cathode (10 mm × 15 mm × 0.25 mm), constant current electrolysis at 4.0 mA. **5** (0.25 mmol), **2** (0.5 mmol) or **4** (0.35 mmol), [Mes-Acr]ClO<sub>4</sub> (5.0 mol %), LiClO<sub>4</sub> (0.1 M), MeCN (4.0 mL), 30–35 °C, 8 h, under N<sub>2</sub>, blue LEDs (450 nm). Yields refer to the isolated product, conversions were determined by  $^{19}\text{F}$ -NMR using 1-fluorononane as internal standard.

## Kinetic Studies

Following the general procedure, caffeine (**5**, 58.2 mg, 0.3 mmol, 1.0 equiv),  $\text{CF}_3\text{SO}_2\text{Na}$  (**2**, 93.6 mg, 0.60 mmol, 2.0 equiv),  $\text{LiClO}_4$  (42 mg, 0.40 mmol) and the photocatalyst (2.0 or 5.0 mol %) were placed into a 10 mL Schlenkflask and closed with a stopper with integrated electrode holders. After evacuation and purging with  $\text{N}_2$  three times, 1-fluorononane (43.8 mg, 0.3 mmol) was added as internal standard followed by  $\text{CH}_3\text{CN}$  (4.0 mL). Equipped with a  $\text{N}_2$ -ballon, the photoelectrocatalysis was performed at ambient temperature with a constant current of 4.0 mA maintained for 8 h under visible light irradiation ( $2 \times$  Kessil A360N or  $2 \times$  Kessil A160WE). During the course of the reaction, an aliquot of 100  $\mu\text{L}$  was removed via syringe after 2 h, 4 h and 8 h. The sample was diluted with  $\text{MeCN-d}_3$ , filtered through a short plug of silica gel and analyzed by crude  $^{19}\text{F}\{^1\text{H}\}$ -NMR.

**Table S3:** Comparison of different photoelectrocatalysts in the trifluoromethylation of caffeine (**5**).

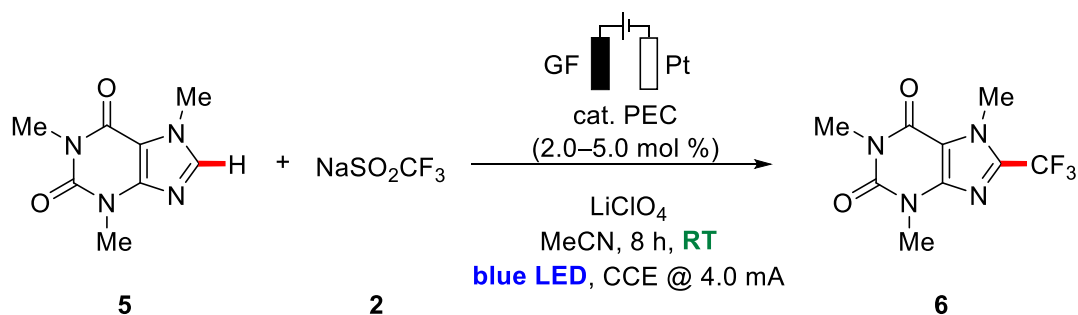

| Entry | Photoelectrocatalyst <sup>[a]</sup> | <b>6</b> (%) 2 h | <b>6</b> (%) 4 h | <b>6</b> (%) 8 h |
|-------|-------------------------------------|------------------|------------------|------------------|
| 1     | [Mes-Acr] $\text{ClO}_4$            | 34%              | 67%              | 79%              |
| 2     | [TAC] $\text{ClO}_4$                | 27%              | 61%              | 81%              |
| 3     | DDQ                                 | 28%              | 62%              | 88%              |
| 4     | DCA                                 | 30%              | 73%              | 83%              |
| 5     | DCN                                 | 23%              | 70%              | 94%              |
| 6     | TBAI                                | 26%              | 63%              | 83%              |
| 7     | TBABr                               | 28%              | 68%              | 90%              |



|    |                                                                                               |     |     |     |
|----|-----------------------------------------------------------------------------------------------|-----|-----|-----|
| 8  | TBACl                                                                                         | 29% | 73% | 94% |
| 9  | CeCl <sub>3</sub> ·7H <sub>2</sub> O                                                          | 27% | 61% | 79% |
| 10 | CeCl <sub>3</sub> ·7H <sub>2</sub> O <sup>[b]</sup>                                           | 31% | 71% | 93% |
| 11 | [Fe(bpy) <sub>3</sub> ](PF <sub>6</sub> ) <sub>2</sub> <sup>[c]</sup>                         | 31% | 71% | 89% |
| 12 | [Ni(bpy) <sub>3</sub> ]Br <sub>2</sub> <sup>[c]</sup>                                         | 30% | 70% | 89% |
| 13 | [Ru(bpy) <sub>3</sub> ](PF <sub>6</sub> ) <sub>2</sub> <sup>[c]</sup>                         | 33% | 65% | 86% |
| 14 | ( <i>n</i> -Bu <sub>4</sub> N) <sub>4</sub> [W <sub>10</sub> O <sub>32</sub> ] <sup>[c]</sup> | 34% | 67% | 79% |
| 15 | ---                                                                                           | 1%  | 3%  | 8%  |

<sup>[a]</sup> Reaction conditions: Undivided cell, GF anode (10 mm × 15 mm × 6 mm), Pt cathode (10 mm × 15 mm × 0.25 mm), constant current electrolysis at 4.0 mA. **5** (0.25 mmol), **2** (0.50 mmol), photoelectrocatalyst (5.0 mol %), LiClO<sub>4</sub> (0.1 m), MeCN (4.0 mL), 30–35 °C, 8 h, under N<sub>2</sub>, blue LEDs (450 nm); conversions were determined by <sup>19</sup>F-NMR using 1-fluorononane as internal standard. <sup>[b]</sup> 390 nm wavelength. <sup>[c]</sup> Photocatalyst (2.0 mol %).

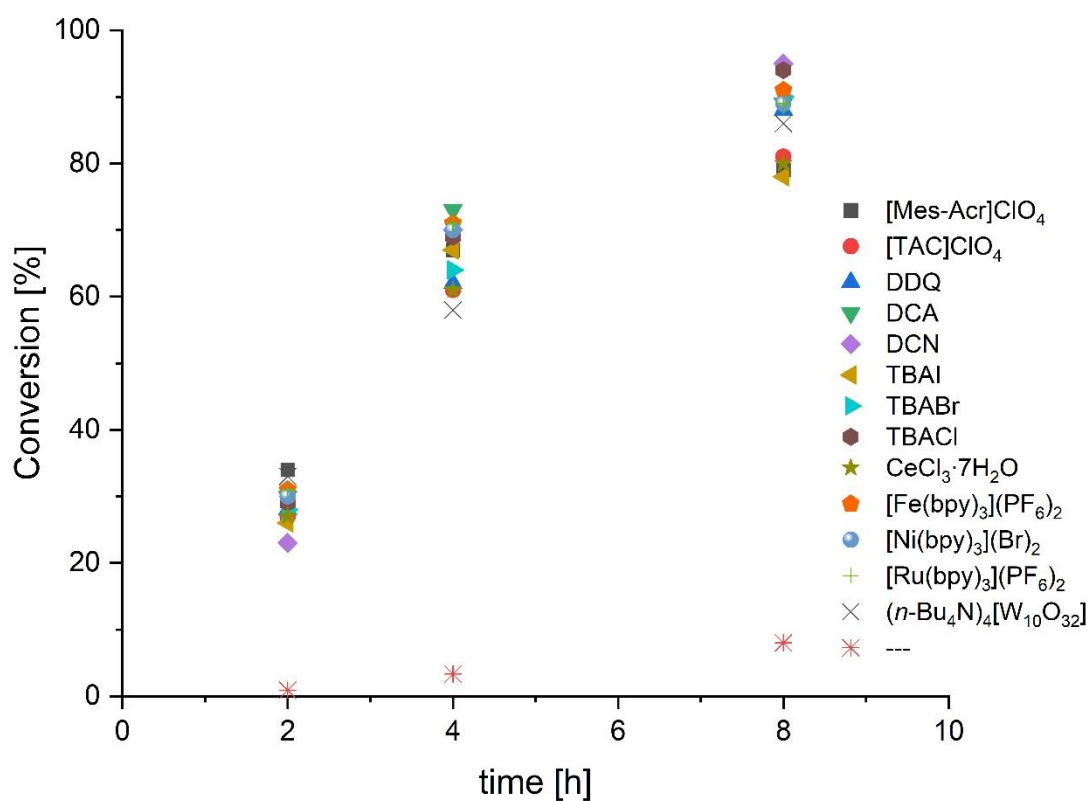

## Characterization Data

### 1,3,5-Trimethoxy-2-(trifluoromethyl)benzene (**1**)

### 1,3,5-Trimethoxy-2,4-bis(trifluoromethyl)benzene (**1**)

The general procedure was followed using 1,3,5-trimethoxybenzene (**1**, 0.25 mmol, 42.0 mg). After electrolysis at 4 mA under blue light irradiation for 8 h, purification by column chromatography (*n*-hexane/EtOAc 10:1) yielded **3** and **3'** as white solids. When [Mes-Acr]ClO<sub>4</sub> was used as photocatalyst, the mono-functionalized product **3** was obtained in 72% (42.3 mg) and the difunctionalized product **3'** in 16% (12.1 mg), while the use of [TAC]ClO<sub>4</sub> gave **3** in 78% (46.0 mg) and **3'** in 9% (6.8 mg).

### 1,3,5-Trimethoxy-2-(trifluoromethyl)benzene (**3**)

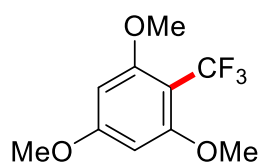

<sup>1</sup>H-NMR (400 MHz, CDCl<sub>3</sub>): δ = 6.14 (s, 2H), 3.83 (s, 9H).

<sup>13</sup>C-NMR (100 MHz, CDCl<sub>3</sub>): δ = 163.7 (C<sub>q</sub>), 160.5 (q, <sup>3</sup>J<sub>C-F</sub> = 1.4 Hz, C<sub>q</sub>), 124.3 (q, <sup>1</sup>J<sub>C-F</sub> = 273.3 Hz, C<sub>q</sub>), 100.5 (q, <sup>2</sup>J<sub>C-F</sub> = 30.2 Hz, C<sub>q</sub>), 91.4 (CH), 56.4 (CH<sub>3</sub>), 55.5 (CH<sub>3</sub>).

<sup>19</sup>F-NMR (377 MHz, CDCl<sub>3</sub>): δ = -54.2 (s).

m.p.: 63–64 °C.

IR (ATR):  $\tilde{\nu}$  = 1589, 1459, 1417, 1278, 1232, 1207, 1161, 1092, 1024, 814 cm<sup>-1</sup>.

MS (ESI) *m/z* (relative intensity): 259 (100) [M+Na]<sup>+</sup>, 237 (90) [M+H]<sup>+</sup>.

HR-MS (ESI): *m/z* calcd for C<sub>10</sub>H<sub>12</sub>F<sub>3</sub>O<sub>3</sub><sup>+</sup> [M+H]<sup>+</sup> 237.0733, found 237.0735.

The spectral data is in accordance with those reported in the literature.<sup>[2]</sup>

### 1,3,5-Trimethoxy-2,4-bis(trifluoromethyl)benzene (**3'**)

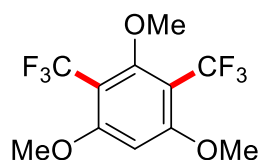

<sup>1</sup>H-NMR (400 MHz, CDCl<sub>3</sub>): δ = 6.35 (s, 1H), 3.96 (s, 6H), 3.82 (s, 3H).

<sup>13</sup>C-NMR (100 MHz, CDCl<sub>3</sub>): δ = 162.5 (C<sub>q</sub>), 160.7 (C<sub>q</sub>), 123.6 (q, <sup>1</sup>J<sub>C-F</sub> = 273.9 Hz, C<sub>q</sub>), 106.3 (q, <sup>2</sup>J<sub>C-F</sub> = 30.2 Hz, C<sub>q</sub>), 92.7 (CH), 64.9 (CH<sub>3</sub>), 56.5 (CH<sub>3</sub>).

<sup>19</sup>F-NMR (377 MHz, CDCl<sub>3</sub>): δ = -55.5 (s).

m.p.: 98–100 °C.

IR (ATR):  $\tilde{\nu}$  = 1604, 1577, 1311, 1257, 1218, 1105, 1059, 731 cm<sup>-1</sup>.

MS (ESI) *m/z* (relative intensity): 327 (100) [M+Na]<sup>+</sup>, 305 (10) [M+H]<sup>+</sup>.

HR-MS (ESI): *m/z* calcd for C<sub>11</sub>H<sub>11</sub>F<sub>6</sub>O<sub>3</sub><sup>+</sup> [M+H]<sup>+</sup> 305.0607, found 305.0609.

The spectral data is in accordance with those reported in the literature.<sup>[3]</sup>

### 1,3,5-Triethyl-2-(trifluoromethyl)benzene (**9**)

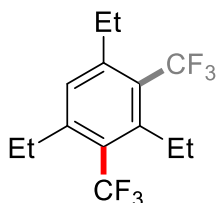

The general procedure was followed using 1,3,5-triethylbenzene (0.25 mmol, 40.6 mg). After electrolysis at 4 mA under blue light irradiation for 8 h, purification by column chromatography (*n*-pentane) yielded **9** as a colourless oil. When [Mes-Acr]ClO<sub>4</sub> was used as photocatalyst, the product **9** was obtained in 63% (36.8 mg), while the use of [TAC]ClO<sub>4</sub> gave 57% (32.7 mg). In both cases, the product was obtained as a mixture with a minor amount of the di-functionalized product in a ratio of 3.6:1. The ratio was determined based on the <sup>1</sup>H-NMR of the isolated product.

**<sup>1</sup>H-NMR** (300 MHz, CDCl<sub>3</sub>):  $\delta$  = 6.97 (s, 2H), 2.90–2.77 (m, 4H), 2.63 (q,  $J$  = 7.6 Hz, 2H), 1.24 (td,  $J$  = 7.7, 3.4 Hz, 9H).

**<sup>13</sup>C-NMR** (100 MHz, CDCl<sub>3</sub>):  $\delta$  = 147.4 (C<sub>q</sub>), 144.1 (q, <sup>3</sup> $J_{C-F}$  = 2.0 Hz, C<sub>q</sub>), 128.7 (CH), 126.3 (q, <sup>1</sup> $J_{C-F}$  = 276.3 Hz, C<sub>q</sub>), 123.8 (q, <sup>2</sup> $J_{C-F}$  = 28.3 Hz, C<sub>q</sub>), 28.6 (CH<sub>2</sub>), 28.1 (CH<sub>2</sub>), 16.7 (CH<sub>3</sub>), 15.3 (CH<sub>3</sub>).

**<sup>19</sup>F-NMR** (377 MHz, CDCl<sub>3</sub>):  $\delta$  = – 52.4 (s).

**IR** (ATR):  $\tilde{\nu}$  = 2968, 1609, 1575, 1459, 1294, 1199, 1144, 1105, 1062, 1038 cm<sup>-1</sup>.

**MS** (EI)  $m/z$  (relative intensity): 230 (10) [M]<sup>+</sup>, 215 (100) [M–CH<sub>3</sub>]<sup>+</sup>.

**HR-MS** (EI):  $m/z$  calcd for C<sub>13</sub>H<sub>17</sub>F<sub>3</sub><sup>+</sup> [M]<sup>+</sup> 230.1277, found 230.1279.

The spectral data is in accordance with those reported in the literature.<sup>[2]</sup>

### 4-Methyl-8-(trifluoromethyl)quinoline (**10**)

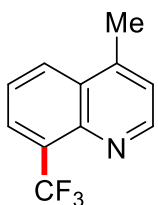

The general procedure was followed using 4-methylquinoline (0.25 mmol, 37.1 mg). After electrolysis at 4 mA under blue light irradiation for 16 h, purification by column chromatography (*n*-hexane/EtOAc 10:1) yielded **10** as a colourless oil. When [Mes-Acr]ClO<sub>4</sub> was used as photocatalyst, the product was obtained in 52% (27.9 mg), while the use of [TAC]ClO<sub>4</sub> gave 60% (31.6 mg).

**<sup>1</sup>H-NMR** (400 MHz, CDCl<sub>3</sub>):  $\delta$  = 8.92 (d,  $J$  = 4.4 Hz, 1H), 8.21 (d,  $J$  = 8.4 Hz, 1H), 8.07 (d,  $J$  = 7.3 Hz, 1H), 7.66–7.55 (m, 1H), 7.33 (d,  $J$  = 4.4 Hz, 1H), 2.73 (s, 3H).

**<sup>13</sup>C-NMR** (100 MHz, CDCl<sub>3</sub>):  $\delta$  = 151.0 (CH), 144.7 (q, <sup>3</sup>J<sub>C-F</sub> = 3.4 Hz, C<sub>q</sub>), 144.7 (C<sub>q</sub>), 128.9 (C<sub>q</sub>), 128.5 (CH), 128.1 (q, <sup>2</sup>J<sub>C-F</sub> = 30.0 Hz, C<sub>q</sub>), 127.7 (q, <sup>3</sup>J<sub>C-F</sub> = 5.9 Hz, CH), 124.4 (q, <sup>1</sup>J<sub>C-F</sub> = 275.4 Hz, C<sub>q</sub>), 125.0 (CH), 122.8 (CH), 19.1 (CH<sub>3</sub>).

**<sup>19</sup>F-NMR** (377 MHz, CDCl<sub>3</sub>):  $\delta$  = - 60.0 (s).

**IR** (ATR):  $\tilde{\nu}$  = 1600, 1315, 1294, 1120, 1092, 1079, 1047, 838, 762, 713 cm<sup>-1</sup>.

**MS** (ESI) *m/z* (relative intensity): 234 (12) [M+Na]<sup>+</sup>, 212 (100) [M+H]<sup>+</sup>.

**HR-MS** (ESI): *m/z* calcd for C<sub>11</sub>H<sub>9</sub>NF<sub>3</sub><sup>+</sup> [M+H]<sup>+</sup> 212.0682, found 212.0684.

The spectral data is in accordance with those reported in the literature.<sup>[2]</sup>

#### 4,7-Dichloro-8-(trifluoromethyl)quinoline (11)

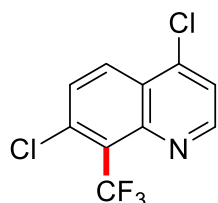

The general procedure was followed using 4,7-dichloroquinoline (0.25 mmol, 49.5 mg). After electrolysis at 4 mA under blue light irradiation for 16 h, purification by column chromatography (*n*-hexane/EtOAc 20:1) and purification by recycling preparative HPLC yielded **11** as a white solid.

When [Mes-Acr]ClO<sub>4</sub> was used as photocatalyst, the product was obtained in 31% (20.7 mg), while the use of [TAC]ClO<sub>4</sub> gave 35% (23.3 mg).

**<sup>1</sup>H-NMR** (300 MHz, CDCl<sub>3</sub>):  $\delta$  = 8.93 (d, *J* = 4.7 Hz, 1H), 8.30 (d, *J* = 9.1 Hz, 1H), 7.69 (d, *J* = 9.1 Hz, 1H), 7.59 (d, *J* = 4.7 Hz, 1H).

**<sup>13</sup>C-NMR** (100 MHz, CDCl<sub>3</sub>):  $\delta$  = 151.1 (CH), 147.5 (C<sub>q</sub>), 142.9 (C<sub>q</sub>), 136.6 (q, <sup>3</sup>J<sub>C-F</sub> = 4.8 Hz, C<sub>q</sub>), 131.1 (CH), 128.6 (CH), 125.6 (C<sub>q</sub>), 125.5 (q, <sup>2</sup>J<sub>C-F</sub> = 32.2 Hz, C<sub>q</sub>), 123.4 (q, <sup>1</sup>J<sub>C-F</sub> = 275.2 Hz, C<sub>q</sub>) 122.2 (CH).

**<sup>19</sup>F-NMR** (377 MHz, CDCl<sub>3</sub>):  $\delta$  = - 53.0 (s).

**m.p.:** 113–116 °C.

**IR** (ATR):  $\tilde{\nu}$  = 1586, 1561, 1485, 1405, 1263, 1204, 1151, 1129, 895, 788 cm<sup>-1</sup>.

**MS** (ESI) *m/z* (relative intensity): 268 (75), [M(<sup>37</sup>Cl)+H]<sup>+</sup>, 266 (100) [M(<sup>35</sup>Cl)+H]<sup>+</sup>.

**HR-MS** (ESI): *m/z* calcd for C<sub>10</sub>H<sub>5</sub>NF<sub>3</sub><sup>35</sup>Cl<sub>2</sub><sup>+</sup> [M+H]<sup>+</sup> 265.9946, found 265.9947.

#### 4,6-Dimethoxy-5-(trifluoromethyl)pyrimidine (12)

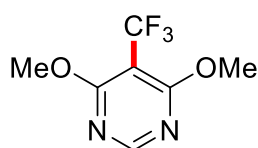

The general procedure was followed using 4,6-dimethoxy pyrimidine (0.25 mmol, 35.0 mg). After electrolysis at 4 mA under blue light irradiation for 16 h, purification by column chromatography (*n*-hexane/EtOAc 30:1 to 20:1) yielded **12** as a white solid. When [Mes-Acr]ClO<sub>4</sub> was used as

photocatalyst, the product was obtained in 68% (35.4 mg), while the use of [TAC]ClO<sub>4</sub> gave 61% (31.7 mg).

**<sup>1</sup>H-NMR** (400 MHz, CDCl<sub>3</sub>):  $\delta$  = 8.46 (s, 1H), 4.03 (s, 6H).

**<sup>13</sup>C-NMR** (100 MHz, CDCl<sub>3</sub>):  $\delta$  = 168.1 (C<sub>q</sub>), 159.1 (CH), 123.0 (q, <sup>1</sup>J<sub>C-F</sub> = 273.0 Hz, C<sub>q</sub>), 95.6 (q, <sup>2</sup>J<sub>C-F</sub> = 33.7 Hz, C<sub>q</sub>), 55.1 (CH<sub>3</sub>).

**<sup>19</sup>F-NMR** (377 MHz, CDCl<sub>3</sub>):  $\delta$  = - 57.0 (s).

**m.p.:** 94–96 °C.

**IR** (ATR):  $\tilde{\nu}$  = 1573, 1475, 1414, 1324, 1247, 1107, 1035, 733, 703 cm<sup>-1</sup>.

**MS** (ESI) *m/z* (relative intensity): 231 (50) [M+Na]<sup>+</sup>, 209 (100) [M+H]<sup>+</sup>.

**HR-MS** (ESI): *m/z* calcd for C<sub>7</sub>H<sub>8</sub>F<sub>3</sub>N<sub>2</sub>O<sub>2</sub>N<sup>+</sup> [M+H]<sup>+</sup> 209.0538, found 209.0541.

The spectral data is in accordance with those reported in the literature.<sup>[2]</sup>

### 3-Methyl-2-(trifluoromethyl)benzofuran (**13**)

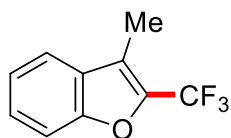

The general procedure was followed using 3-methylbenzofurane (0.25 mmol, 33.0 mg). After electrolysis at 4 mA under blue light irradiation for 8 h, purification by column chromatography (*n*-hexane) yielded **13** as a

colourless oil. When [Mes-Acr]ClO<sub>4</sub> was used as photocatalyst, the product was obtained in 71% (35.5 mg), while the use of [TAC]ClO<sub>4</sub> gave 72% (36.0 mg).

**<sup>1</sup>H-NMR** (300 MHz, CDCl<sub>3</sub>):  $\delta$  = 7.61 (dd, *J* = 7.7, 1.2 Hz, 1H), 7.52 (dd, *J* = 8.3, 0.9 Hz, 1H), 7.47–7.40 (m, 1H), 7.33 (dd, *J* = 7.5, 1.1 Hz, 1H), 2.42 (s, 3H).

**<sup>13</sup>C-NMR** (100 MHz, CDCl<sub>3</sub>):  $\delta$  = 154.2 (C<sub>q</sub>), 138.6 (q, <sup>2</sup>J<sub>C-F</sub> = 39.7 Hz, C<sub>q</sub>), 128.5 (C<sub>q</sub>), 127.1 (CH), 123.5 (CH), 120.8 (CH), 120.4 (q, <sup>1</sup>J<sub>C-F</sub> = 269.4 Hz, C<sub>q</sub>), 118.4 (q, <sup>3</sup>J<sub>C-F</sub> = 2.6 Hz, C<sub>q</sub>), 112.0 (CH), 7.8 (q, <sup>4</sup>J<sub>C-F</sub> = 1.8 Hz, CH<sub>3</sub>).

**<sup>19</sup>F-NMR** (282 MHz, CDCl<sub>3</sub>):  $\delta$  = - 62.0 (s).

**IR** (ATR):  $\tilde{\nu}$  = 1635, 1395, 1383, 1301, 1367, 1179, 1111, 1082, 1038, 743 cm<sup>-1</sup>.

**MS** (EI) *m/z* (relative intensity): 200 (100) [M]<sup>+</sup>.

**HR-MS** (EI): *m/z* calcd for C<sub>10</sub>H<sub>7</sub>F<sub>3</sub>O [M]<sup>+</sup> 200.0444, found 200.0448.

The spectral data is in accordance with those reported in the literature.<sup>[2]</sup>

### ***N*-Methyl-5-(trifluoromethyl)furan-3-carboxamide (14)**

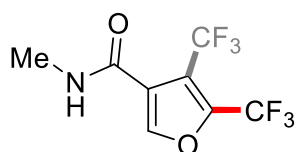

The general procedure was followed using *N*-methylfuran-3-carboxamide (0.25 mmol, 31.2 mg). After electrolysis at 4 mA under blue light irradiation for 16 h, purification by column chromatography (*n*-hexane/EtOAc 1:1 to 1:2) yielded **14** as a pale yellow oil. When [Mes-Acr]ClO<sub>4</sub> was used as photocatalyst, the product was obtained in 69% (33.3 mg), while the use of [TAC]ClO<sub>4</sub> gave 74% (35.7 mg) in both cases as mixture of isomers in a ratio of 3.0:1 as determined based on the <sup>1</sup>H-NMR of the isolated product. The reported NMR data corresponds to the main isomer. **<sup>1</sup>H-NMR** (300 MHz, CDCl<sub>3</sub>): δ = 7.46 (s, 1H), 6.70 (s, 1H), 6.35 (s br, 1H), 2.94 (d, *J* = 4.9 Hz, 3H).

**<sup>13</sup>C-NMR** (100 MHz, CDCl<sub>3</sub>): δ = 161.6 (C<sub>q</sub>), 143.9 (q, <sup>3</sup>*J*<sub>C-F</sub> = 2.4 Hz, CH), 139.8 (q, <sup>2</sup>*J*<sub>C-F</sub> = 42.3 Hz, C<sub>q</sub>), 123.6 (C<sub>q</sub>), 118.9 (q, <sup>1</sup>*J*<sub>C-F</sub> = 268.7 Hz, C<sub>q</sub>), 111.6 (CH), 26.7 (CH<sub>3</sub>).

**<sup>19</sup>F-NMR** (282 MHz, CDCl<sub>3</sub>): δ = -61.2 (s).

**IR** (ATR):  $\tilde{\nu}$  = 1406, 1304, 1266, 1175, 1131, 1105, 935, 894, 734, 702 cm<sup>-1</sup>.

**MS** (ESI) *m/z* (relative intensity): 216 (100) [M+Na]<sup>+</sup>, 194 (12) [M+H]<sup>+</sup>.

**HR-MS** (EI): *m/z* calcd for C<sub>7</sub>H<sub>6</sub>NO<sub>2</sub>F<sub>3</sub>Na [M+Na]<sup>+</sup> 216.0243, found 216.0253.

### ***N*-Methyl-5-(trifluoromethyl)thiophene-3-carboxamide (15)**

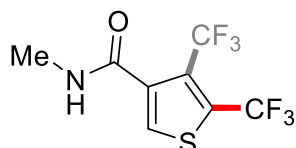

The general procedure was followed using *N*-methylthiophen-3-carboxamide (0.25 mmol, 35.2 mg). After electrolysis at 4 mA under blue light irradiation for 16 h, purification by column chromatography (*n*-hexane/EtOAc 2:1 to 1:1) yielded **15** as a white solid. When [Mes-Acr]ClO<sub>4</sub> was used as photocatalyst, the product was obtained in 65% (33.8 mg), while the use of [TAC]ClO<sub>4</sub> gave 68% (35.8 mg) in both cases as mixture of isomers in a ratio of 2.7:1 as determined based on the <sup>1</sup>H-NMR of the isolated product. The reported NMR data corresponds to the main isomer. **<sup>1</sup>H-NMR** (400 MHz, CDCl<sub>3</sub>): δ = 7.43 (dd, *J* = 3.2, 2.3 Hz, 1H), 7.32–7.03 (m, 1H), 6.16 (s br, 1H), 3.19–2.89 (m, 3H).

**<sup>13</sup>C-NMR** (100 MHz, CDCl<sub>3</sub>): δ = 163.5 (C<sub>q</sub>), 137.6 (C<sub>q</sub>), 129.9 (q, <sup>2</sup>*J*<sub>C-H</sub> = 36.9 Hz, C<sub>q</sub>), 129.1 (CH), 127.1 (q, <sup>3</sup>*J*<sub>C-H</sub> = 5.6 Hz, CH), 122.0 (q, <sup>1</sup>*J*<sub>C-H</sub> = 269.7 Hz, C<sub>q</sub>), 27.0 (CH<sub>3</sub>).

**<sup>19</sup>F-NMR** (377 MHz, CDCl<sub>3</sub>): δ = -52.8 (s).

**IR** (ATR):  $\tilde{\nu}$  = 1638, 1562, 1523, 1431, 1276, 1159, 1119, 1019, 1007 cm<sup>-1</sup>.

**MS** (ESI) *m/z* (relative intensity): 232 (100) [M+Na]<sup>+</sup>, 210 (9) [M+H]<sup>+</sup>.

**HR-MS** (ESI): *m/z* calcd for C<sub>7</sub>H<sub>6</sub>SNOF<sub>3</sub>Na [M+Na]<sup>+</sup> 232.0014, found 232.0020.

### *N*-(*tert*-Butyl)-3,4,5-trimethoxy-2-(trifluoromethyl)benzamide (**16**)

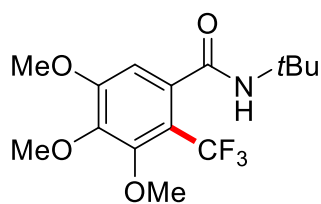

The general procedure was followed using *N*-(*tert*-butyl)-3,4,5-trimethoxybenzamide (0.25 mmol, 42.0 mg). After electrolysis at 4 mA under blue light irradiation for 16 h, purification by column chromatography (*n*-hexane/EtOAc 4:1 to 2:1) yielded **16** as a white solid. When [Mes-Acr]ClO<sub>4</sub> was used as photocatalyst, the product was obtained in 56% (46.9 mg), while the use of [TAC]ClO<sub>4</sub> gave 53% (44.4 mg). The obtained product shows in the <sup>1</sup>H- and <sup>13</sup>C-NMR in CDCl<sub>3</sub> a splitting of the signals in two sets as a consequence of the limited rotation along the amide bond.

**<sup>1</sup>H-NMR** (400 MHz, CDCl<sub>3</sub>):  $\delta$  = 6.65 (s, 1H), 5.45 (s br, 1H), 3.92 (s, 3H), 3.90 (s, 3H), 3.86 (s, 3H), 1.42 (s, 9H).

**<sup>13</sup>C-NMR** (100 MHz, CDCl<sub>3</sub>):  $\delta$  = 167.4 (C<sub>q</sub>), 156.2 (C<sub>q</sub>), 153.2 (C<sub>q</sub>), 143.4 (C<sub>q</sub>), 133.7 (q, <sup>3</sup>J<sub>C-F</sub> = 2.6 Hz, C<sub>q</sub>), 123.5 (q, <sup>1</sup>J<sub>C-F</sub> = 273.7 Hz, C<sub>q</sub>), 113.6 (q, <sup>2</sup>J<sub>C-F</sub> = 30.5 Hz, C<sub>q</sub>), 106.8 (CH), 61.9 (CH<sub>3</sub>), 61.0 (CH<sub>3</sub>), 56.4 (CH<sub>3</sub>), 52.3 (C<sub>q</sub>), 28.6 (CH<sub>3</sub>).

**<sup>19</sup>F-NMR** (377 MHz, CDCl<sub>3</sub>):  $\delta$  = - 55.6 (s).

**m.p.:** 107–108 °C.

**IR** (ATR):  $\tilde{\nu}$  = 1641, 1580, 1496, 1453, 1403, 1302, 1116, 1009, 930 cm<sup>-1</sup>.

**MS** (ESI) *m/z* (relative intensity): 358 (100) [M+Na]<sup>+</sup>, 336 (5) [M+H]<sup>+</sup>.

**HR-MS** (ESI): *m/z* calcd for C<sub>15</sub>H<sub>20</sub>NO<sub>4</sub>F<sub>3</sub>Na [M+Na]<sup>+</sup> 358.1237, found 358.1237.

The spectral data is in accordance with those reported in the literature.<sup>[4]</sup>

### 1,3,7-Trimethyl-8-(trifluoromethyl)-3,7-dihydro-1*H*-purine-2,6-dione (**6**)

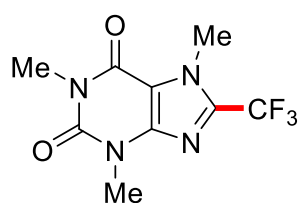

The general procedure was followed using caffeine (0.25 mmol, 48.5 mg). After electrolysis at 4 mA under blue light irradiation for 8 h, purification by column chromatography (*n*-hexane/EtOAc 3:1) yielded **6** as a white solid. When [Mes-Acr]ClO<sub>4</sub> was used as photocatalyst, the product was obtained in 71% (46.5 mg), while the use of [TAC]ClO<sub>4</sub> gave 70% (45.8 mg).

**<sup>1</sup>H-NMR** (400 MHz, CDCl<sub>3</sub>):  $\delta$  = 4.13 (s, 3H), 3.56 (s, 3H), 3.38 (s, 3H).

**<sup>13</sup>C-NMR** (100 MHz, CDCl<sub>3</sub>):  $\delta$  = 155.5 (C<sub>q</sub>), 151.4 (C<sub>q</sub>), 146.6 (C<sub>q</sub>), 138.9 (q, <sup>2</sup>J<sub>C-F</sub> = 39.9 Hz, C<sub>q</sub>), 118.2 (q, <sup>1</sup>J<sub>C-F</sub> = 270.4 Hz, C<sub>q</sub>), 109.7 (C<sub>q</sub>), 33.3 (q, <sup>4</sup>J<sub>C-F</sub> = 1.9 Hz, CH<sub>3</sub>), 30.0 (CH<sub>3</sub>), 28.3 (CH<sub>3</sub>).

**<sup>19</sup>F-NMR** (377 MHz, CDCl<sub>3</sub>):  $\delta$  = - 62.4 (s).

**IR** (ATR):  $\tilde{\nu} = 1709, 1665, 1548, 1247, 1202, 1178, 1098, 973, 745 \text{ cm}^{-1}$ .

**m.p.:** 129–130 °C.

**MS** (ESI)  $m/z$  (relative intensity): 285 (80)  $[\text{M}+\text{Na}]^+$ , 263 (100)  $[\text{M}+\text{H}]^+$ .

**HR-MS** (ESI):  $m/z$  calcd for  $\text{C}_9\text{H}_{10}\text{N}_4\text{F}_3\text{O}_2^+$   $[\text{M}+\text{H}]^+$  263.0750, found 263.2754.

The spectral data is in accordance with those reported in the literature.<sup>[2]</sup>

**Methyl (S)-2-((tert-butoxycarbonyl)amino)-3-(1-(pyridin-2-yl)-2-(trifluoromethyl)-1H-indol-3-yl)propanoate (17)**

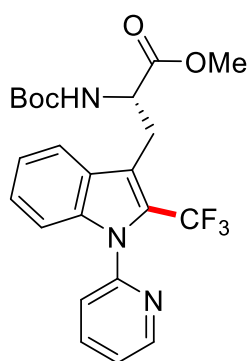

The general procedure was followed using the tryptophan derivative methyl  $N^\alpha$ -((tert-butoxycarbonyl)-1-(pyridin-2-yl)-L-tryptophanate (0.25 mmol, 98.8 mg). After electrolysis at 4 mA under blue light irradiation for 16 h, purification by column chromatography (*n*-hexane/EtOAc 4:1) yielded **17** as a white solid. When  $[\text{Mes-Acr}]\text{ClO}_4$  was used as photocatalyst, the product was obtained in 49% (56.7 mg), while the use of  $[\text{TAC}]\text{ClO}_4$  gave 53% (61.3 mg).

**$^1\text{H-NMR}$**  (400 MHz,  $\text{CDCl}_3$ ):  $\delta = 8.79\text{--}8.50$  (m, 1H), 7.91 (ddd,  $J = 7.7, 7.7, 1.7$  Hz, 1H), 7.76 (d,  $J = 7.8$  Hz, 1H), 7.51–7.39 (m, 2H), 7.35–7.03 (m, 3H), 5.23 (s, 1H), 4.69 (t,  $J = 7.1$  Hz, 1H), 3.66 (s, 3H), 3.48 (d,  $J = 6.6$  Hz, 2H), 1.40 (s, 9H).

**$^{13}\text{C-NMR}$**  (100 MHz,  $\text{CDCl}_3$ ):  $\delta = 172.4$  ( $\text{C}_q$ ), 155.1 ( $\text{C}_q$ ), 150.6 ( $\text{C}_q$ ), 149.8 (CH), 138.7 (CH), 138.2 ( $\text{C}_q$ ), 127.1 ( $\text{C}_q$ ), 125.8 (CH), 124.3 (q,  $^2J_{\text{C-F}} = 34.2$  Hz,  $\text{C}_q$ ), 123.7 (CH), 122.4 (CH), 121.9 (q,  $^1J_{\text{C-F}} = 273.4$  Hz,  $\text{C}_q$ ), 121.8 (CH), 120.5 (CH), 115.8 ( $\text{C}_q$ ), 111.4 (CH), 79.9 ( $\text{C}_q$ ), 54.1 (CH), 52.4 ( $\text{CH}_3$ ), 28.4 ( $\text{CH}_3$ ), 27.9 ( $\text{CH}_2$ ).

**$^{19}\text{F-NMR}$**  (377 MHz,  $\text{CDCl}_3$ ):  $\delta = -53.5$  (s).

**m.p.:** 108–109 °C.

**IR** (ATR):  $\tilde{\nu} = 1746, 1714, 1590, 1469, 1438, 1367, 1276, 1113, 1059 \text{ cm}^{-1}$ .

**MS** (ESI)  $m/z$  (relative intensity): 486 (100)  $[\text{M}+\text{Na}]^+$ , 464 (100)  $[\text{M}+\text{H}]^+$ .

**HR-MS** (ESI):  $m/z$  calcd for  $\text{C}_{23}\text{H}_{24}\text{F}_3\text{N}_3\text{O}_4\text{Na}^+$   $[\text{M}+\text{Na}]^+$  486.1611, found 486.1617.



#### 4-(9-Isopropyl-8-(trifluoromethyl)-9H-purin-6-yl)morpholine (18)

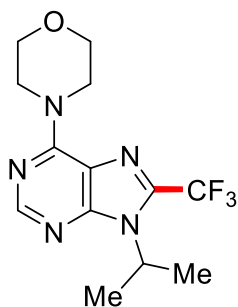

The general procedure was followed using 4-(9-isopropyl-9H-purin-6-yl)morpholine (0.25 mmol, 61.8 mg). After electrolysis at 4 mA under blue light irradiation for 16 h, purification by column chromatography (*n*-hexane/EtOAc 3:1) yielded **18** as a white solid. When [Mes-Acr]ClO<sub>4</sub> was used as photocatalyst, the product was obtained in 49% (38.6 mg), while the use of [TAC]ClO<sub>4</sub> gave 56% (44.1 mg).

**<sup>1</sup>H-NMR** (400 MHz, CDCl<sub>3</sub>):  $\delta$  = 8.39 (s, 1H), 4.84 (hept,  $J$  = 6.9 Hz, 1H), 4.32 (s br, 4H), 3.84 (t,  $J$  = 4.6 Hz, 4H), 1.75 (d,  $J$  = 6.8 Hz, 6H).

**<sup>13</sup>C-NMR** (100 MHz, CDCl<sub>3</sub>):  $\delta$  = 154.7 (C<sub>q</sub>), 153.4 (CH), 152.5 (C<sub>q</sub>), 135.9 (q,  $^2J_{C-F}$  = 39.0 Hz, C<sub>q</sub>), 119.4 (C<sub>q</sub>), 119.1 (q,  $^1J_{C-F}$  = 270.7 Hz, C<sub>q</sub>), 67.2 (CH<sub>2</sub>), 67.2 (CH<sub>2</sub>), 50.6 (CH), 21.1 (CH<sub>3</sub>).

**<sup>19</sup>F-NMR** (377 MHz, CDCl<sub>3</sub>):  $\delta$  = - 62.1 (s).

**m.p.:** 99–101 °C.

**IR** (ATR):  $\tilde{\nu}$  = 1588, 1496, 1441, 1263, 1181, 1163, 1112, 1053, 1009, 930 cm<sup>-1</sup>.

**MS** (ESI)  $m/z$  (relative intensity): 316 (100) [M+H]<sup>+</sup>.

**HR-MS** (ESI):  $m/z$  calcd for C<sub>13</sub>H<sub>17</sub>F<sub>3</sub>N<sub>5</sub>O<sup>+</sup> [M+H]<sup>+</sup> 316.380, found 316.1385.

#### 3,7-Dimethyl-1-(5-oxohexyl)-8-(trifluoromethyl)-3,7-dihydro-1H-purine-2,6-dione (19)

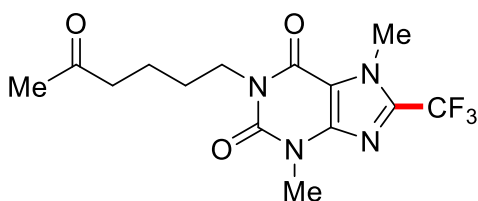

The general procedure was followed using Pentoxifylline (0.25 mmol, 69.5 mg). After electrolysis at 4 mA under blue light irradiation for 16 h, purification by column chromatography (*n*-hexane/EtOAc 1:1) yielded **19** as a white solid. When [Mes-Acr]ClO<sub>4</sub> was used as photocatalyst, the product was obtained in 73% (63.1 mg), while the use of [TAC]ClO<sub>4</sub> gave 72% (62.2 mg).

**<sup>1</sup>H-NMR** (400 MHz, CDCl<sub>3</sub>):  $\delta$  = 4.13 (t,  $J$  = 1.6 Hz, 3H), 3.99 (t,  $J$  = 8.0 Hz, 2H), 3.56 (s, 3H), 2.49 (t,  $J$  = 6.9 Hz, 2H), 2.13 (s, 3H), 1.67–1.56 (m, 4H).

**<sup>13</sup>C-NMR** (100 MHz, CDCl<sub>3</sub>):  $\delta$  = 208.7 (C<sub>q</sub>), 155.4 (C<sub>q</sub>), 151.2 (C<sub>q</sub>), 146.7 (C<sub>q</sub>), 139.0 (q,  $^2J_{C-F}$  = 40.1 Hz, C<sub>q</sub>), 118.3 (q,  $^1J_{C-F}$  = 271.4 Hz, C<sub>q</sub>), 109.8 (C<sub>q</sub>), 43.2 (CH<sub>2</sub>), 41.2 (CH<sub>2</sub>), 33.3 (q,  $^4J_{C-F}$  = 2.0 Hz, CH<sub>3</sub>), 30.1 (CH<sub>3</sub>), 30.0 (CH<sub>3</sub>), 27.4 (CH<sub>2</sub>), 21.0 (CH<sub>2</sub>).

**<sup>19</sup>F-NMR** (282 MHz, CDCl<sub>3</sub>):  $\delta$  = - 62.4 (s).

**m.p.:** 70–72 °C.

**IR** (ATR):  $\tilde{\nu} = 1705, 1656, 1546, 1468, 1248, 1170, 1128, 1099, 766 \text{ cm}^{-1}$ .

**MS** (ESI)  $m/z$  (relative intensity): 369 (100)  $[\text{M}+\text{Na}]^+$ , 347 (10)  $[\text{M}+\text{H}]^+$ .

**HR-MS** (ESI):  $m/z$  calcd for  $\text{C}_{14}\text{H}_{17}\text{F}_3\text{N}_4\text{O}_3\text{Na}^+$   $[\text{M}+\text{Na}]^+$  369.1145, found 369.1153.

The spectral data is in accordance with those reported in the literature.<sup>[1]</sup>

#### **Methyl 4-amino-2-hydroxy-3-(trifluoromethyl)benzoate (21a)**

#### **Methyl 4-amino-2-hydroxy-5-(trifluoromethyl)benzoate (21b)**

#### **Methyl 4-amino-2-hydroxy-3,5-bis(trifluoromethyl)benzoate (21c)**

The general procedure was followed using methyl 4-amino-2-hydroxybenzoate (**20**, 0.50 mmol, 84.3 mg). After electrolysis at 4 mA under blue light irradiation for 8 h, purification by column chromatography (*n*-hexane/EtOAc 9:1) yielded **21a** and **21b** and **21c** as white solids. When  $[\text{Mes-Acr}]\text{ClO}_4$  was used as photocatalyst, the mono-functionalized product **21a** was obtained in 28% (33.8 mg), **21b** in 11% (12.8 mg) and the difunctionalized **21c** in 3% (4.8 mg), while the use of  $[\text{TAC}]\text{ClO}_4$  gave **21a** in 50% (58.5 mg), **21b** in 15% (17.9 mg) and **21c** in 9% (14.1 mg).

#### **Methyl 4-amino-2-hydroxy-3-(trifluoromethyl)benzoate (21a)**

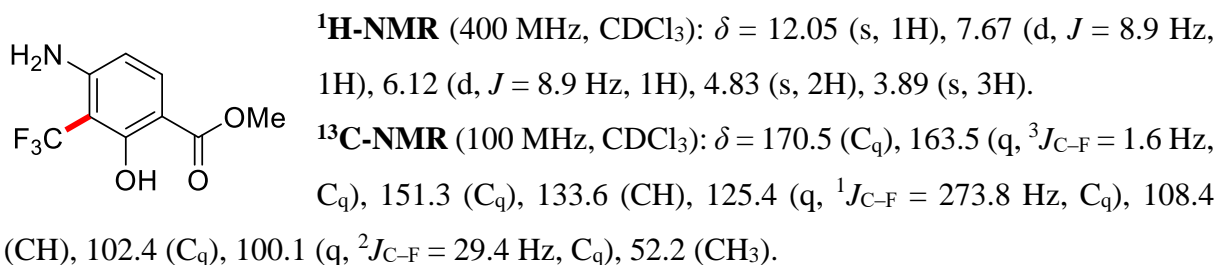

**<sup>19</sup>F-NMR** (377 MHz,  $\text{CDCl}_3$ ):  $\delta = -55.1$  (s).

**m.p.:** 73–75 °C.

**IR** (ATR):  $\tilde{\nu} = 1627, 1575, 1505, 1441, 1352, 1272, 1105, 1070, 969, 759 \text{ cm}^{-1}$ .

**MS** (ESI)  $m/z$  (relative intensity): 258 (100)  $[\text{M}+\text{Na}]^+$ , 236 (90)  $[\text{M}+\text{H}]^+$ .

**HR-MS** (ESI):  $m/z$  calcd for  $\text{C}_9\text{H}_9\text{F}_3\text{O}_3^+$   $[\text{M}+\text{H}]^+$  236.0529, found 236.0522.

### Methyl 4-amino-2-hydroxy-5-(trifluoromethyl)benzoate (21b)

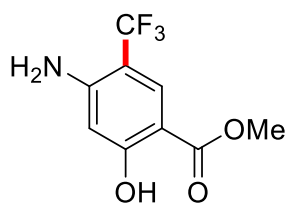

**<sup>1</sup>H-NMR** (400 MHz, CDCl<sub>3</sub>):  $\delta$  = 11.05 (s, 1H), 7.96 (s, 1H), 6.20 (s, 1H), 4.56 (s, 2H), 3.91 (s, 3H).

**<sup>13</sup>C-NMR** (100 MHz, CDCl<sub>3</sub>):  $\delta$  = 169.9 (C<sub>q</sub>), 165.1 (C<sub>q</sub>), 150.6 (q, <sup>4</sup>J<sub>C-F</sub> = 1.4 Hz, C<sub>q</sub>), 130.5 (q, <sup>3</sup>J<sub>C-F</sub> = 5.4 Hz, CH), 124.6 (q, <sup>1</sup>J<sub>C-F</sub> = 271.1 Hz, C<sub>q</sub>), 106.5 (q, <sup>2</sup>J<sub>C-F</sub> = 31.2 Hz, C<sub>q</sub>), 103.0 (C<sub>q</sub>), 102.5 (CH),

52.2 (CH<sub>3</sub>).

**<sup>9</sup>F-NMR** (377 MHz, CDCl<sub>3</sub>):  $\delta$  = - 61.6 (s).

**m.p.:** 93–95 °C.

**IR** (ATR):  $\tilde{\nu}$  = 1671, 1638, 1331, 1255, 1234, 1211, 1076, 786, 683 cm<sup>-1</sup>.

**MS** (ESI) *m/z* (relative intensity): 234 (100) [M-H]<sup>-</sup>.

**HR-MS** (ESI): *m/z* calcd for C<sub>9</sub>H<sub>7</sub>F<sub>3</sub>O<sub>3</sub><sup>-</sup> [M-H]<sup>-</sup> 234.0384, found 234.0374.

### Methyl 4-amino-2-hydroxy-3,5-bis(trifluoromethyl)benzoate (21c)

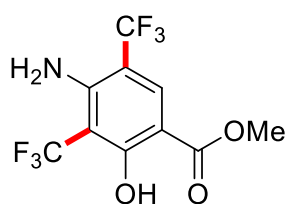

**<sup>1</sup>H-NMR** (400 MHz, CDCl<sub>3</sub>):  $\delta$  = 12.29 (s, 1H), 8.09 (s, 1H), 5.38 (s, 2H), 3.94 (s, 3H).

**<sup>13</sup>C-NMR** (100 MHz, CDCl<sub>3</sub>):  $\delta$  = 169.9 (C<sub>q</sub>), 165.1 (C<sub>q</sub>), 149.0 (C<sub>q</sub>), 132.7 (q, <sup>3</sup>J<sub>C-F</sub> = 5.7 Hz, CH), 124.7 (q, <sup>1</sup>J<sub>C-F</sub> = 274.7 Hz, C<sub>q</sub>), 124.7 (q, <sup>1</sup>J<sub>C-F</sub> = 271.5 Hz, C<sub>q</sub>), 106.8 (q, <sup>2</sup>J<sub>C-F</sub> = 30.9 Hz, C<sub>q</sub>), 101.9 (C<sub>q</sub>), 101.3 (q, <sup>2</sup>J<sub>C-F</sub> = 29.3 Hz, C<sub>q</sub>), 52.7 (CH<sub>3</sub>).

**<sup>19</sup>F-NMR** (377 MHz, CDCl<sub>3</sub>):  $\delta$  = - 55.1 (s), - 62.1 (s).

**m.p.:** 112–113 °C.

**IR** (ATR):  $\tilde{\nu}$  = 1648, 1591, 1489, 1438, 1232, 1069, 968, 801, 643 cm<sup>-1</sup>.

**MS** (ESI) *m/z* (relative intensity): 302 (100) [M-H]<sup>-</sup>.

**HR-MS** (ESI): *m/z* calcd for C<sub>10</sub>H<sub>6</sub>F<sub>6</sub>O<sub>3</sub><sup>-</sup> [M-H]<sup>-</sup> 302.0257, found 302.0260.

## References

- [1] A. G. O'Brien, A. Maruyama, Y. Inokuma, M. Fujita, P. S. Baran, D. G. Blackmond, *Angew. Chem. Int. Ed.* **2014**, *53*, 11868–11871.
- [2] Y. Qiu, A. Scheremetjew, L. H. Finger, L. Ackermann, *Chem. Eur. J.* **2020**, *26*, 3241–3246.
- [3] L. Li, X. Mu, W. Liu, Y. Wang, Z. Mi, C.-J. Li, *J. Am. Chem. Soc.* **2016**, *138*, 5809–5812.
- [4] X. Lu, R. Kawazu, J. Song, Y. Yoshigoe, T. Torigoe, Y. Kuninobu, *Org. Lett.* **2021**, *23*, 4327–4331.

# NMR Spectra

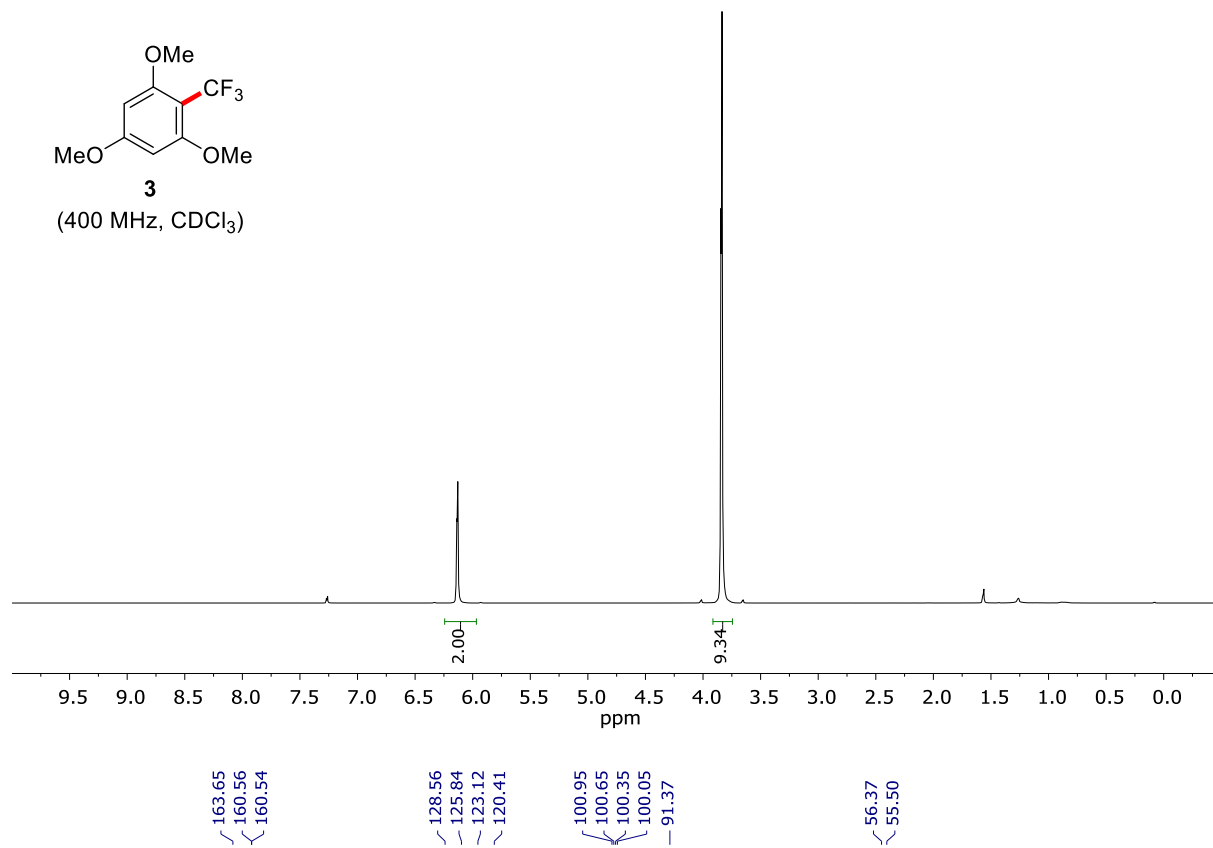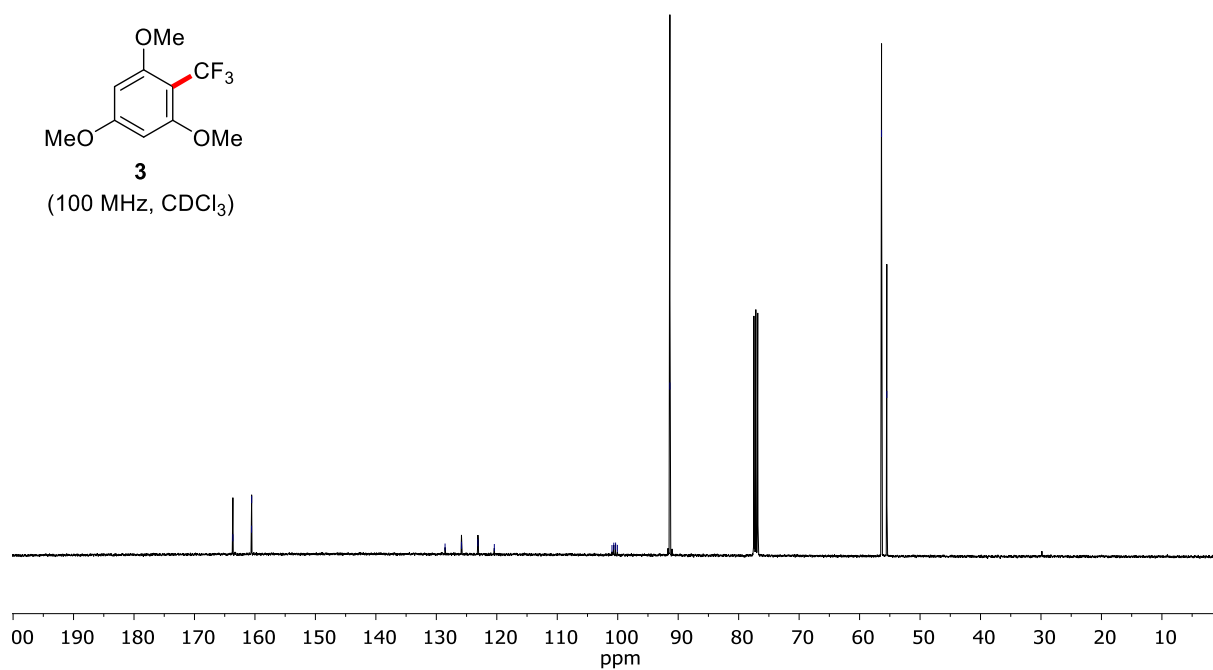

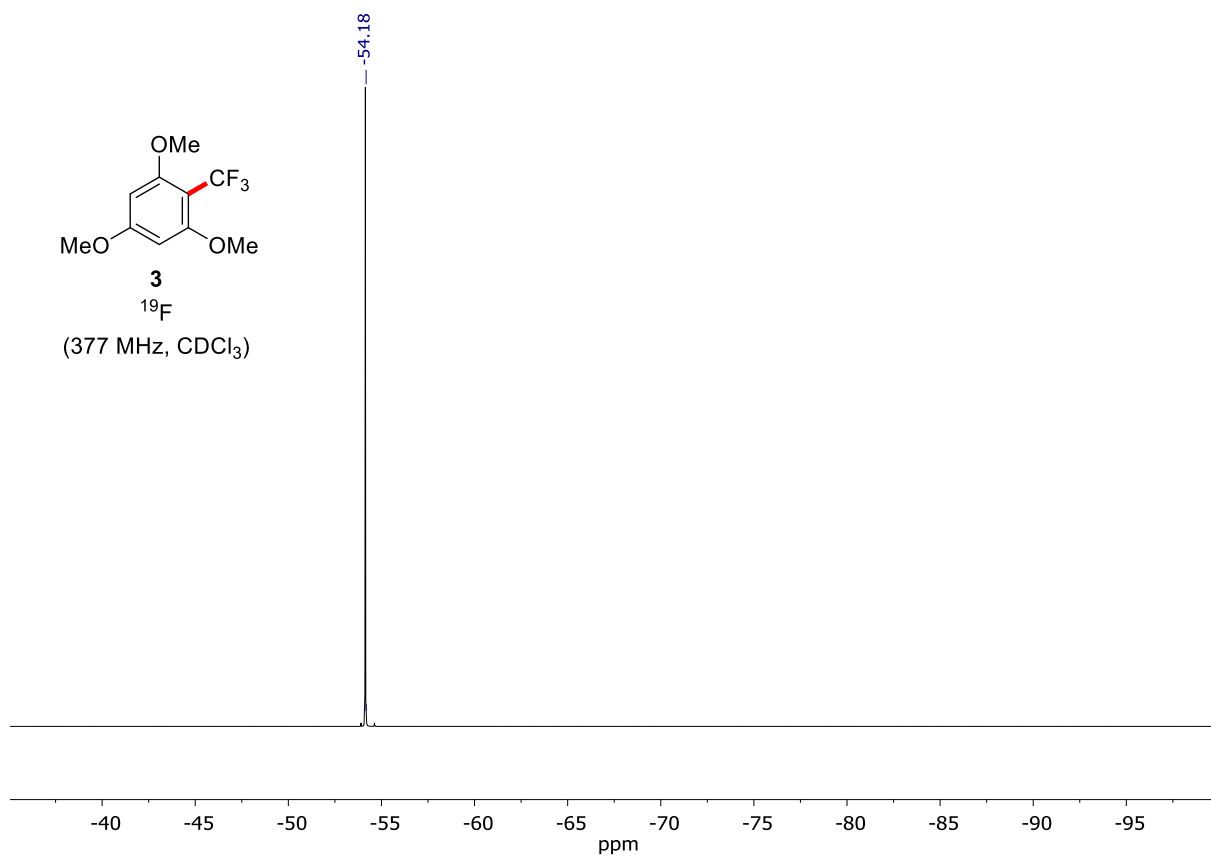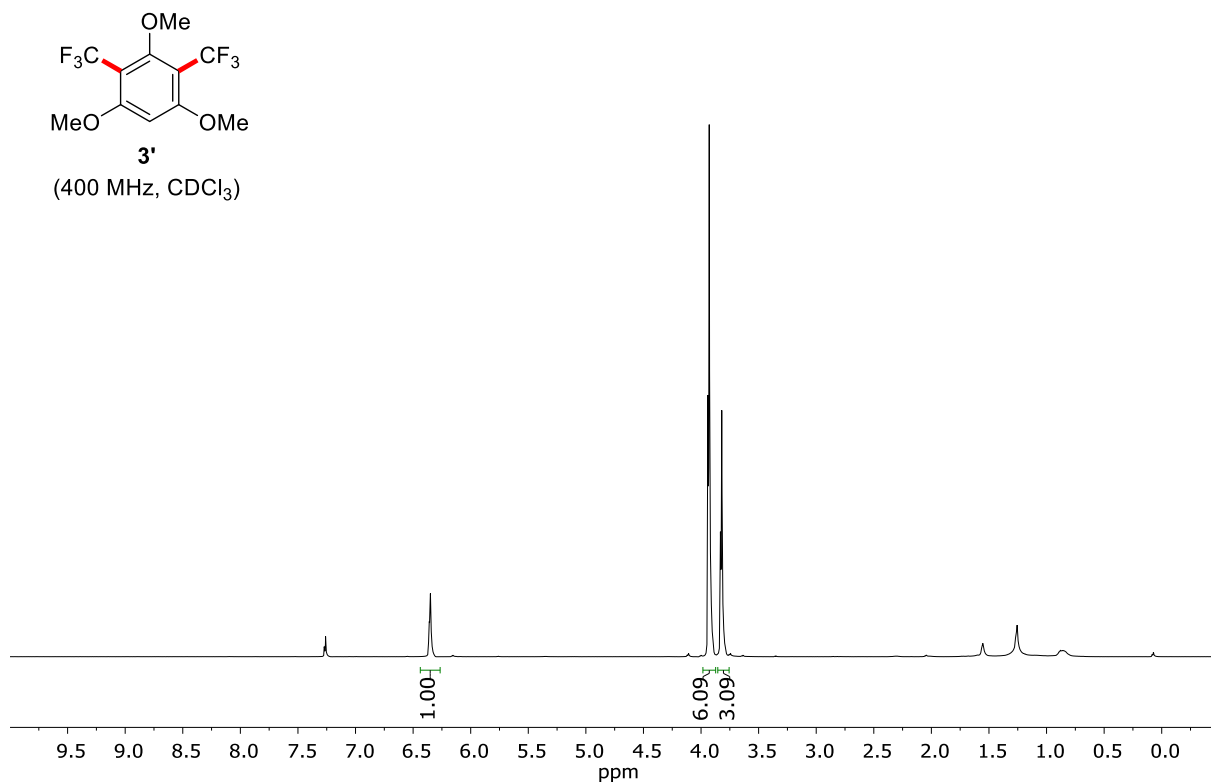

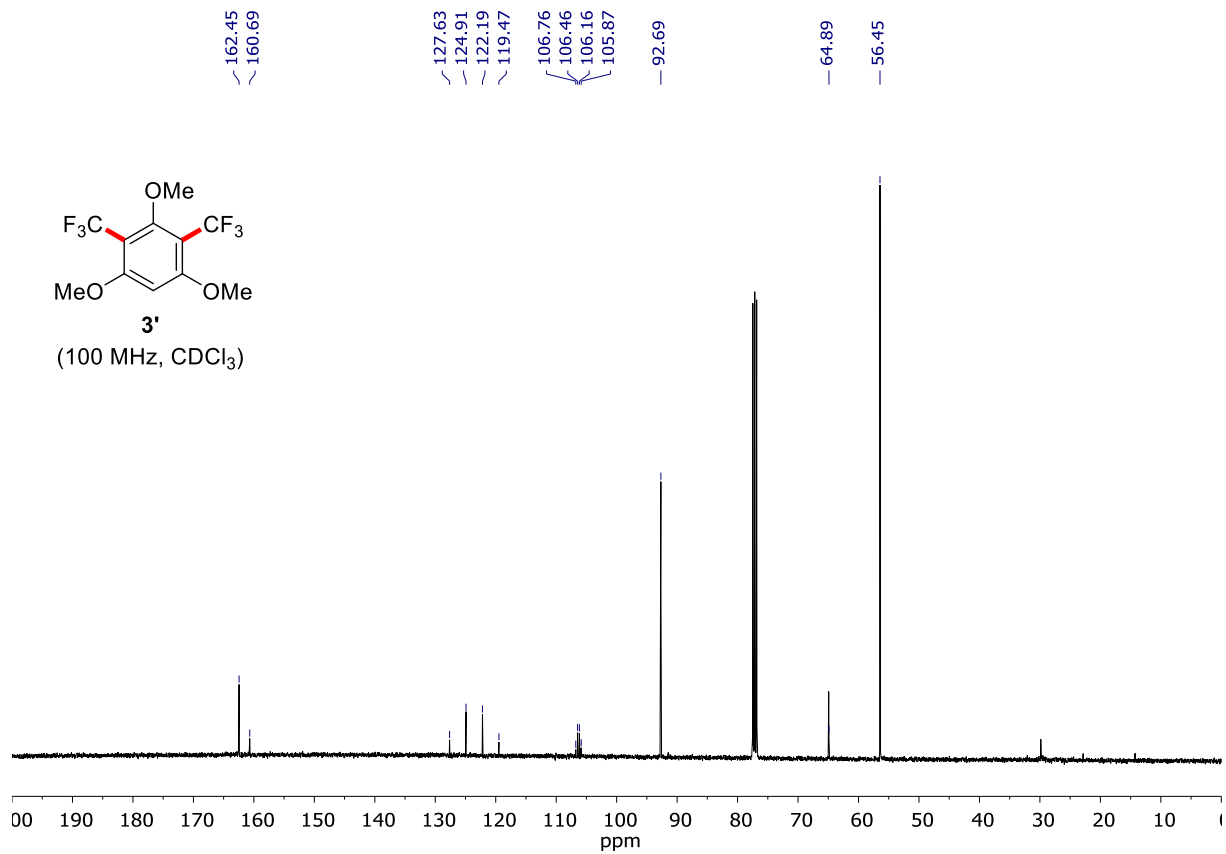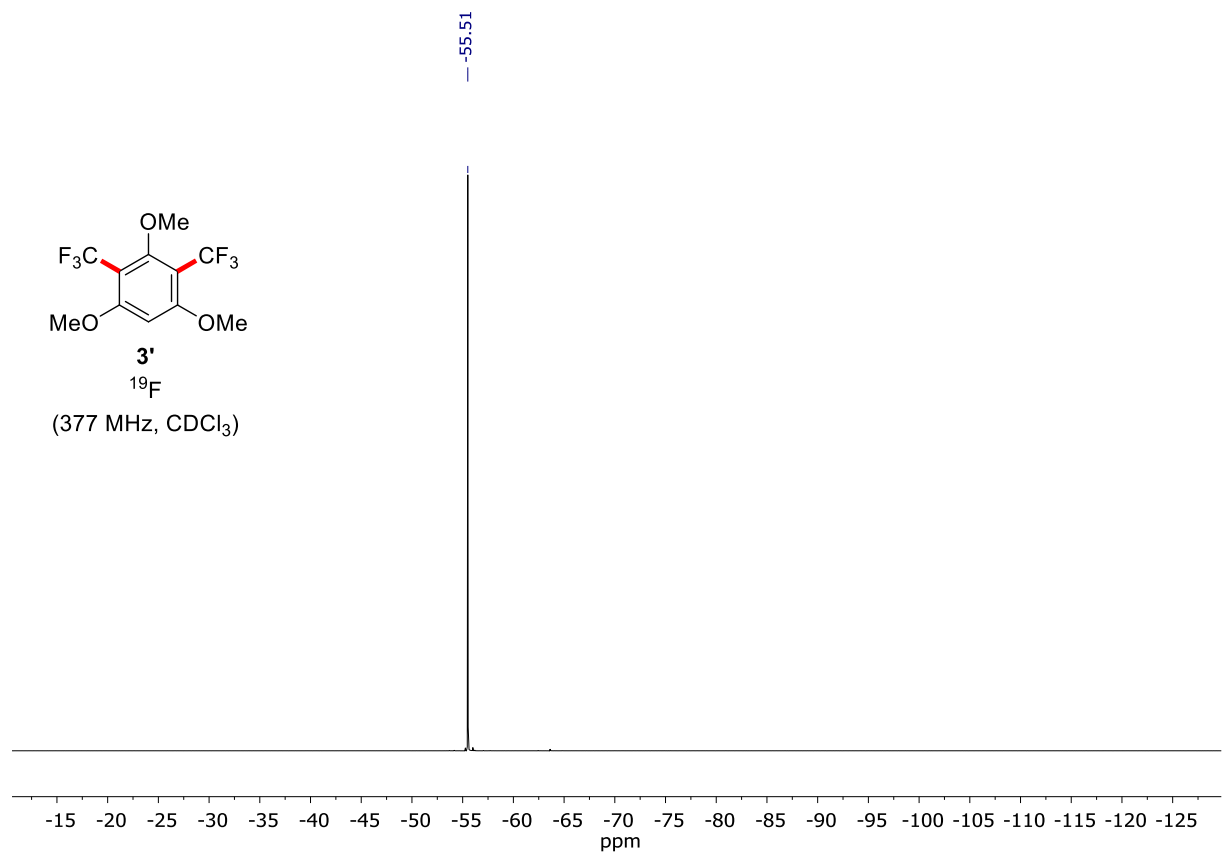

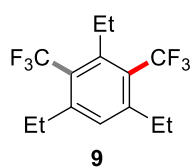

(300 MHz, CDCl<sub>3</sub>)  
Ratio mono/di: 3.6:1

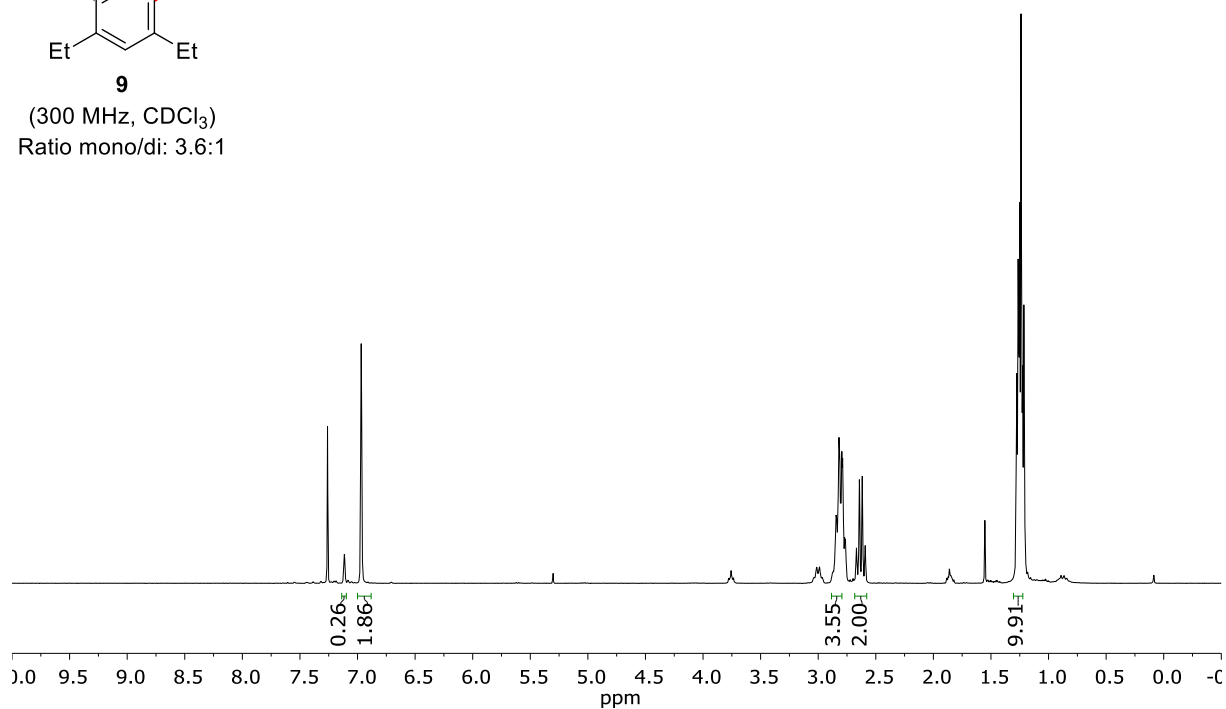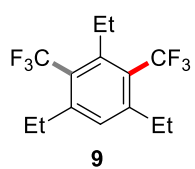

(100 MHz, CDCl<sub>3</sub>)  
Ratio mono/di: 3.6:1

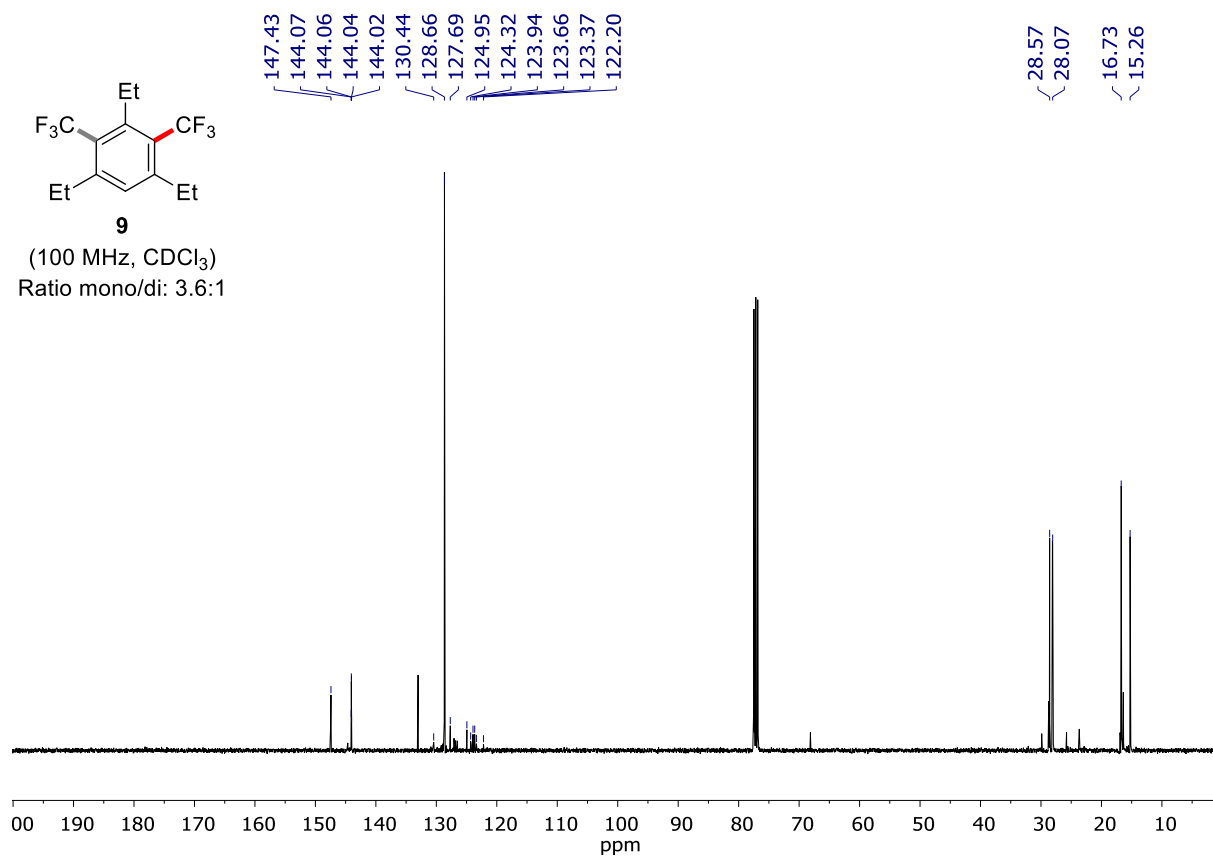



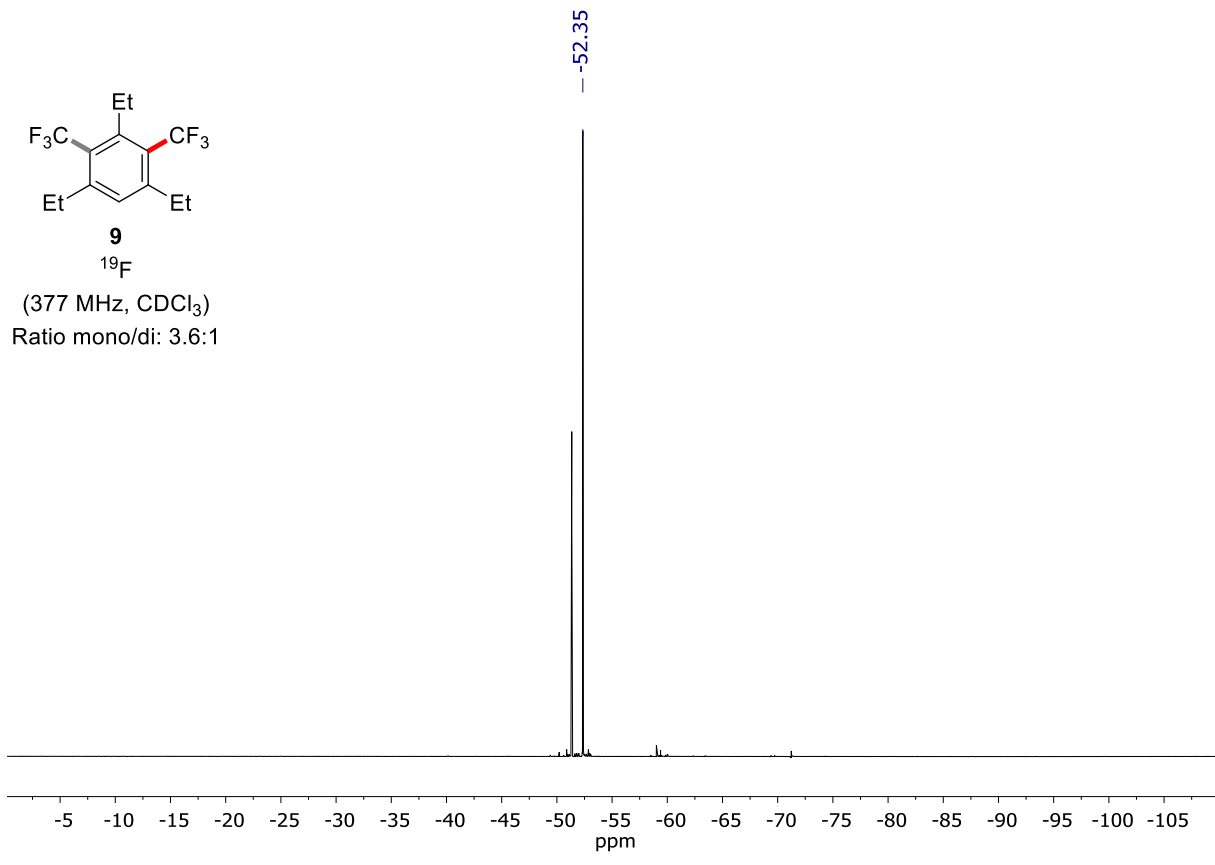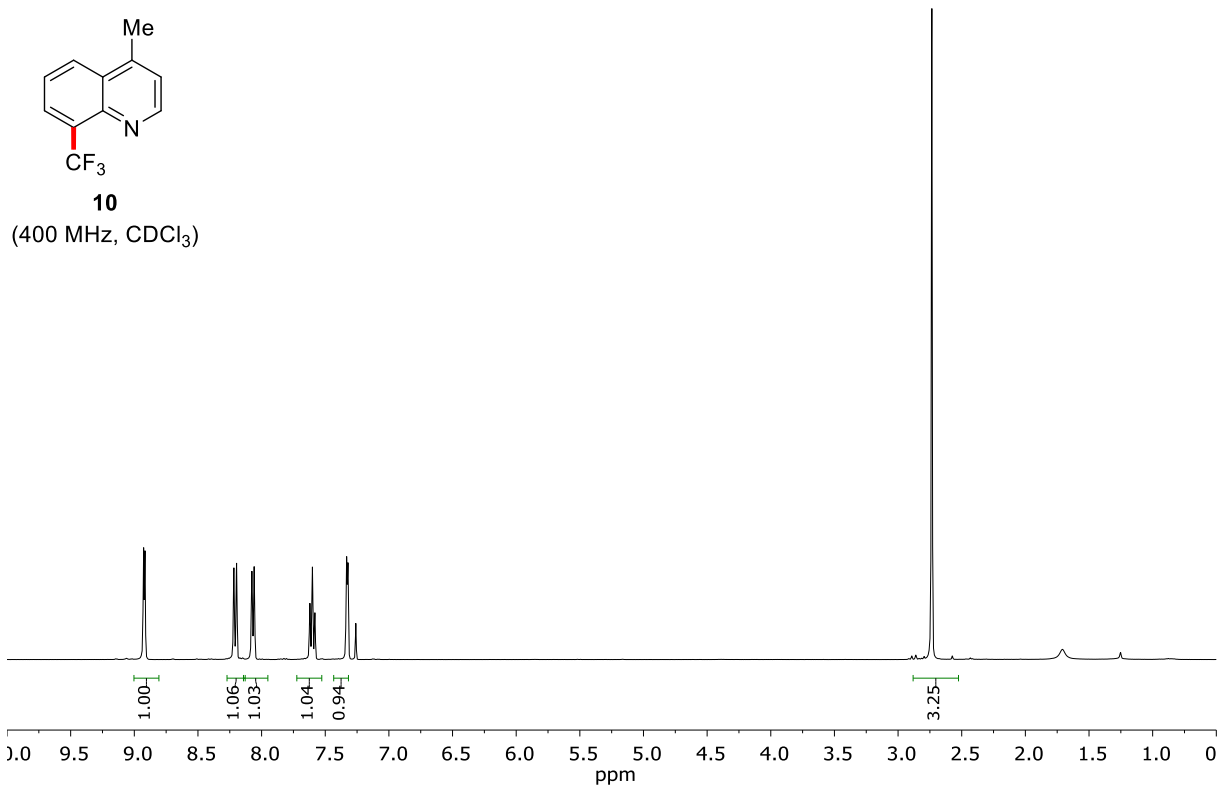

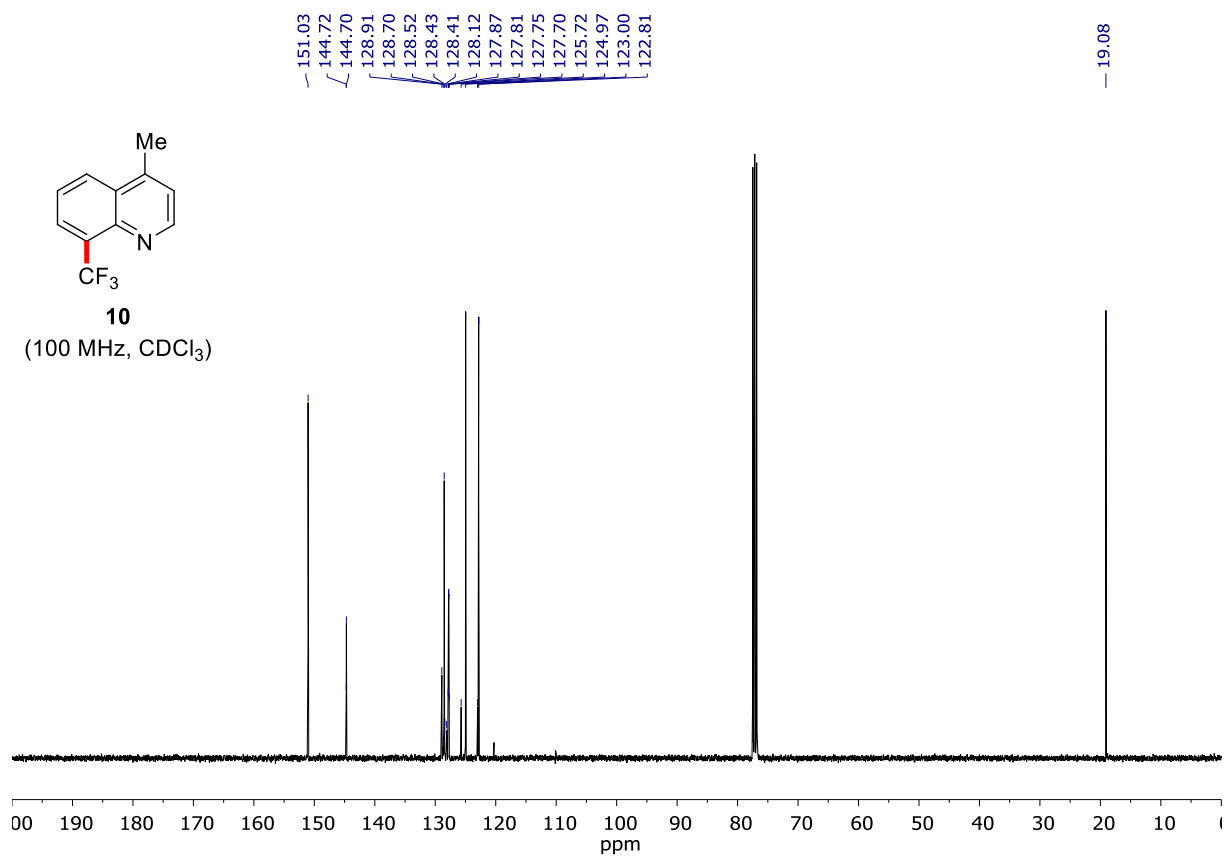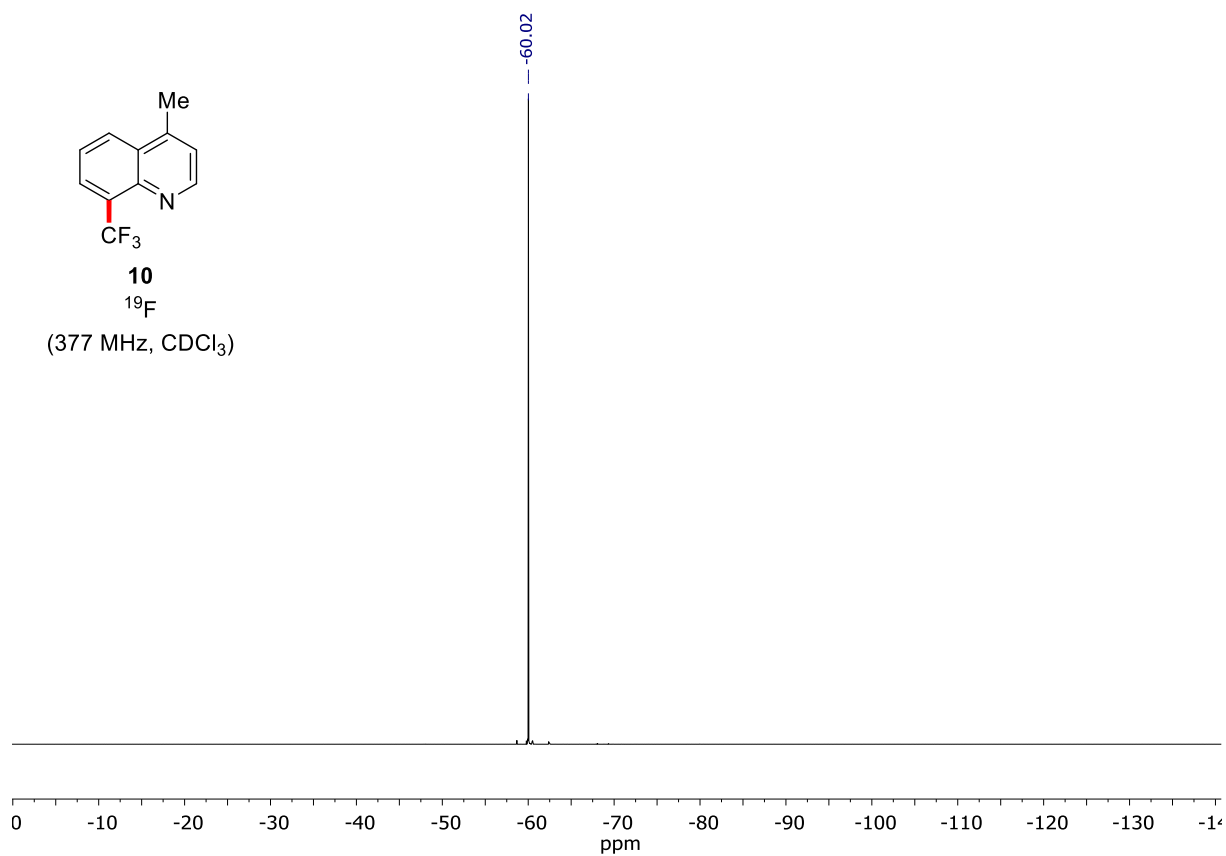

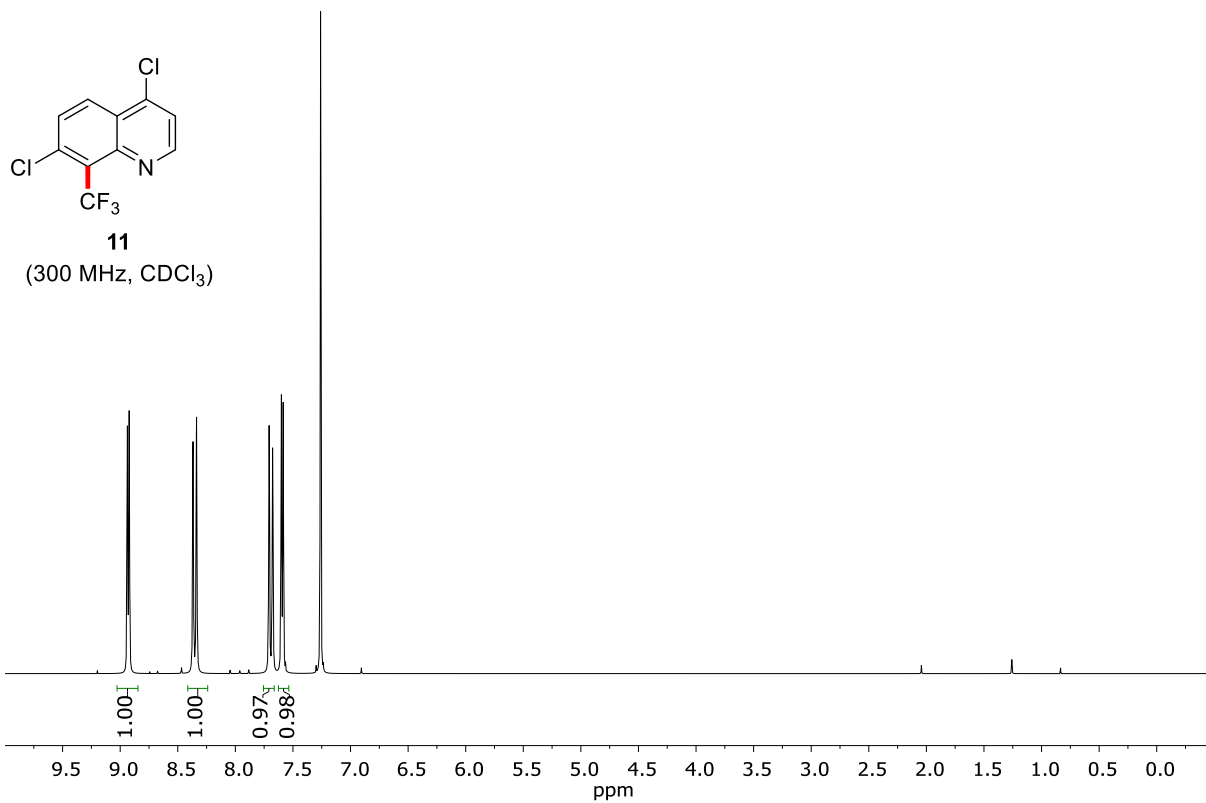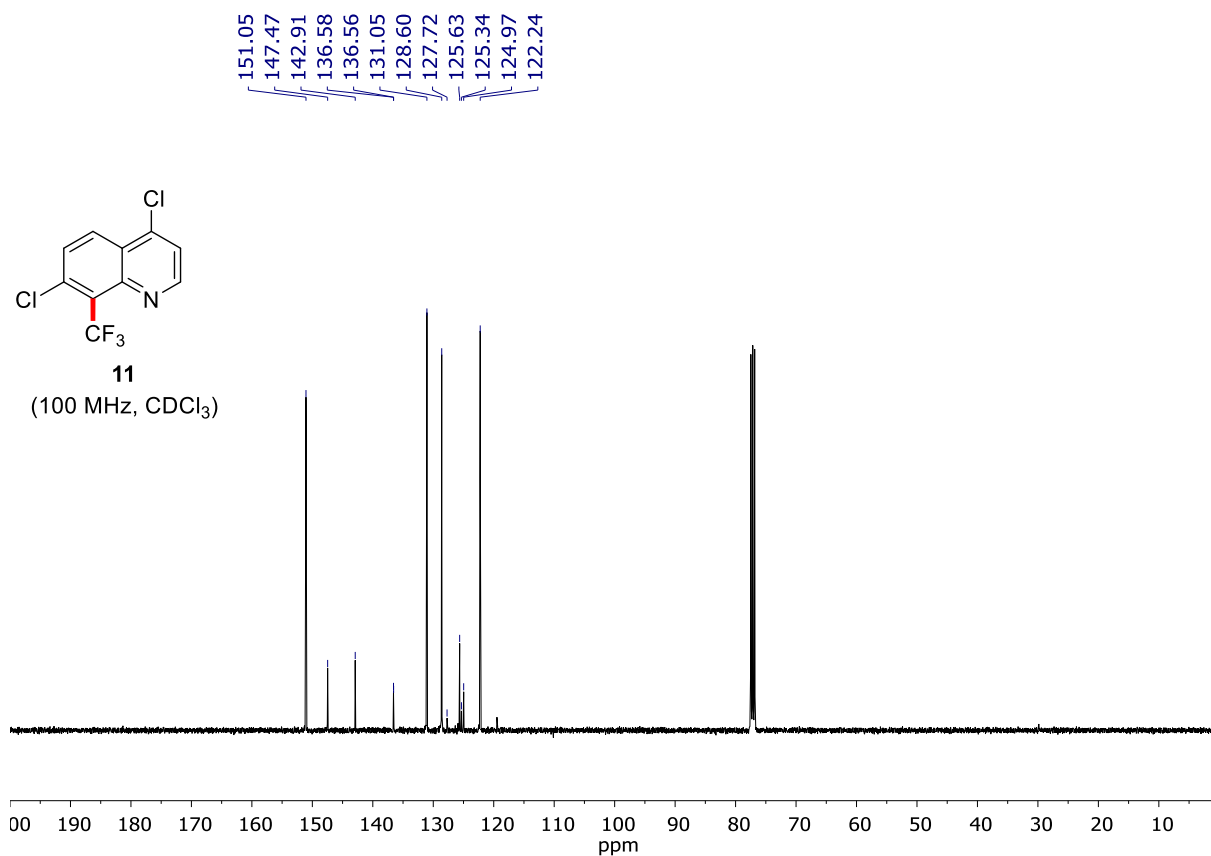

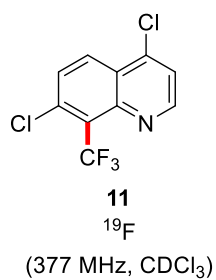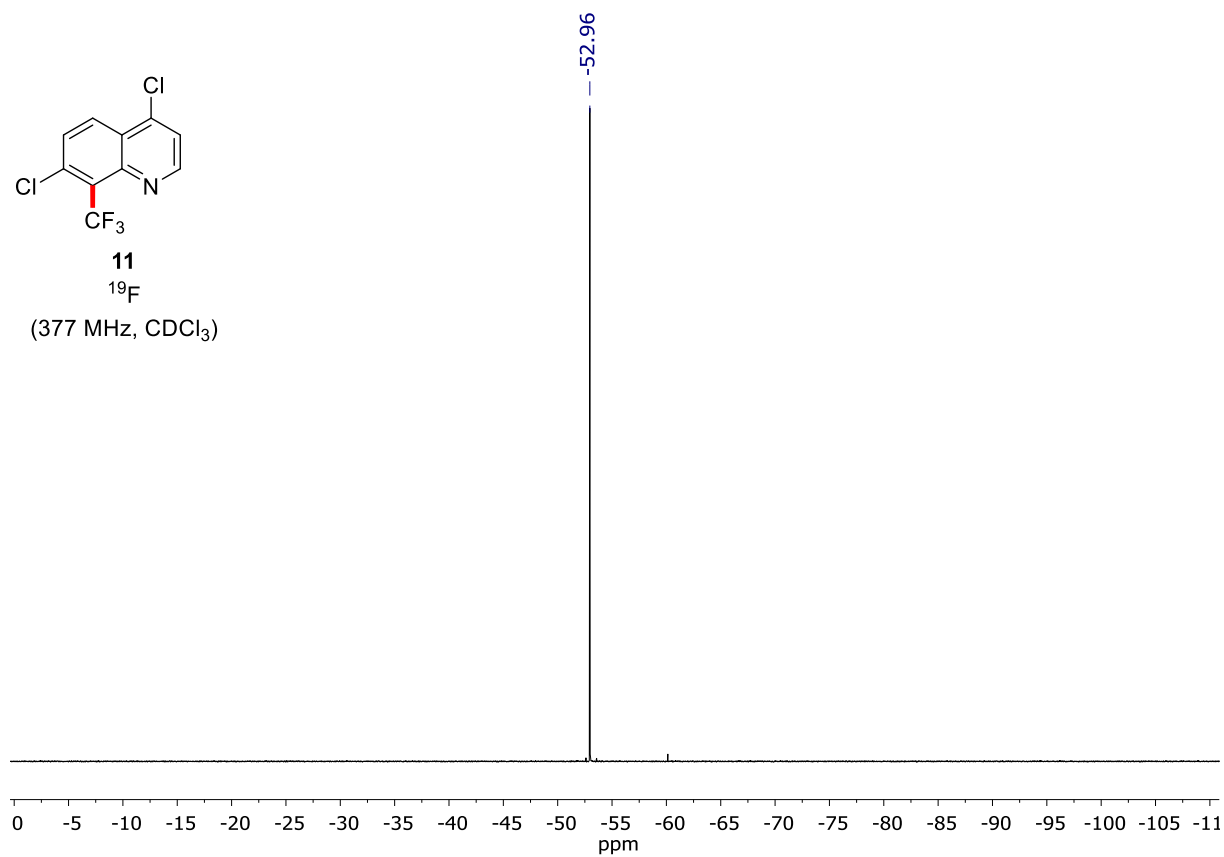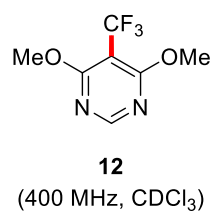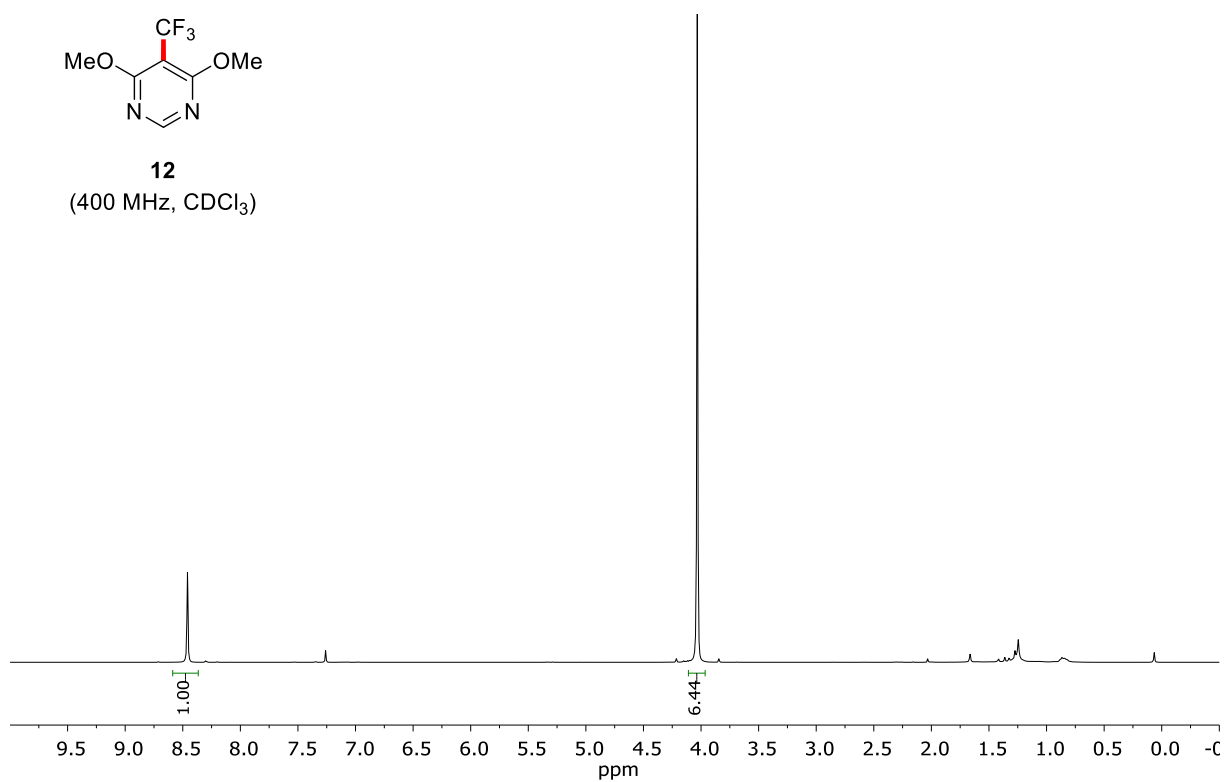

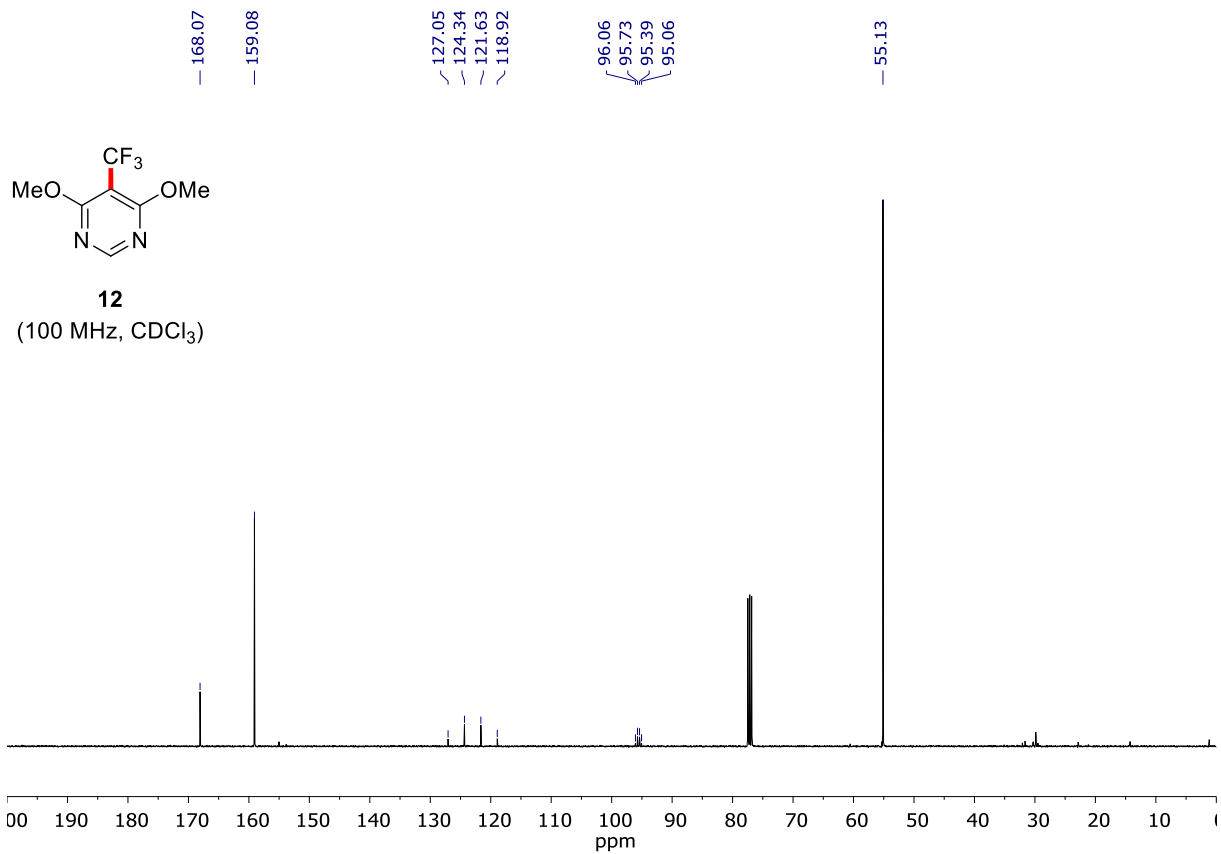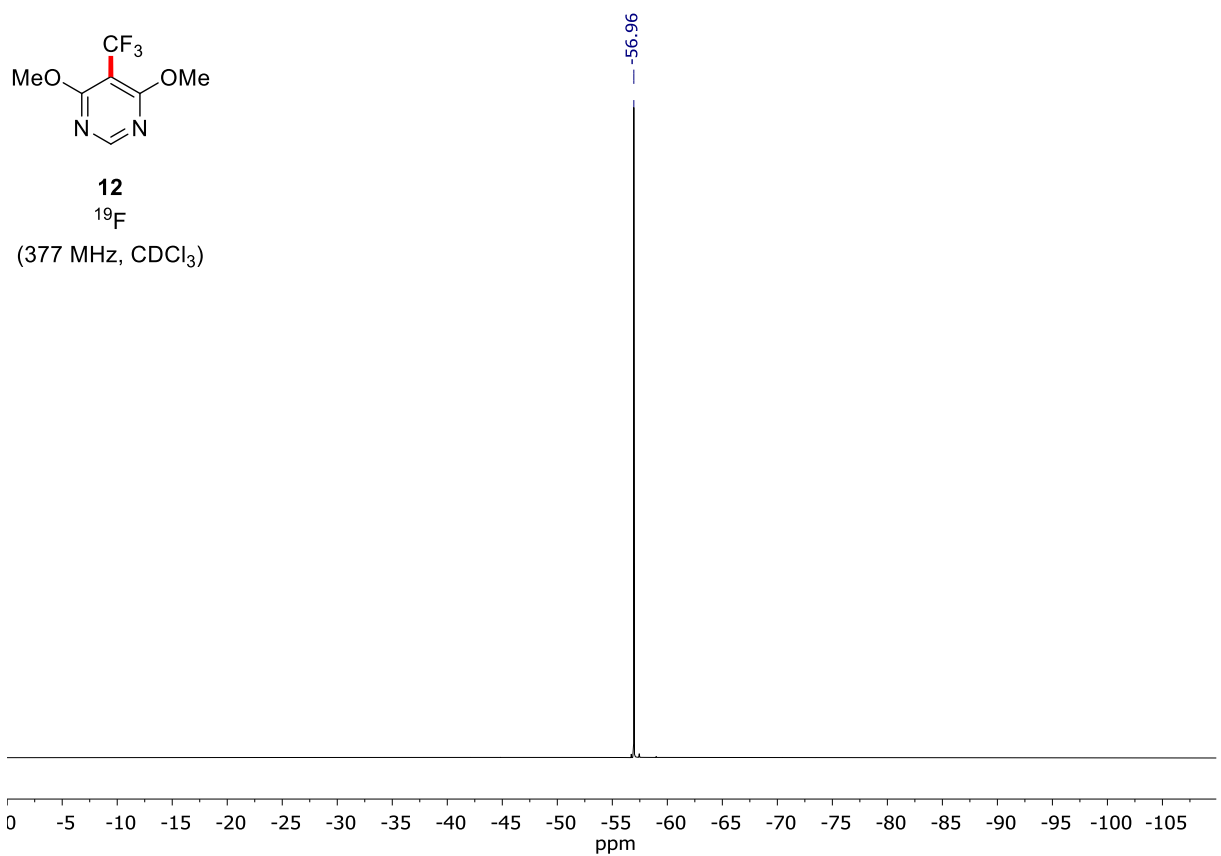

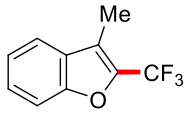

**13**  
(300 MHz, CDCl<sub>3</sub>)

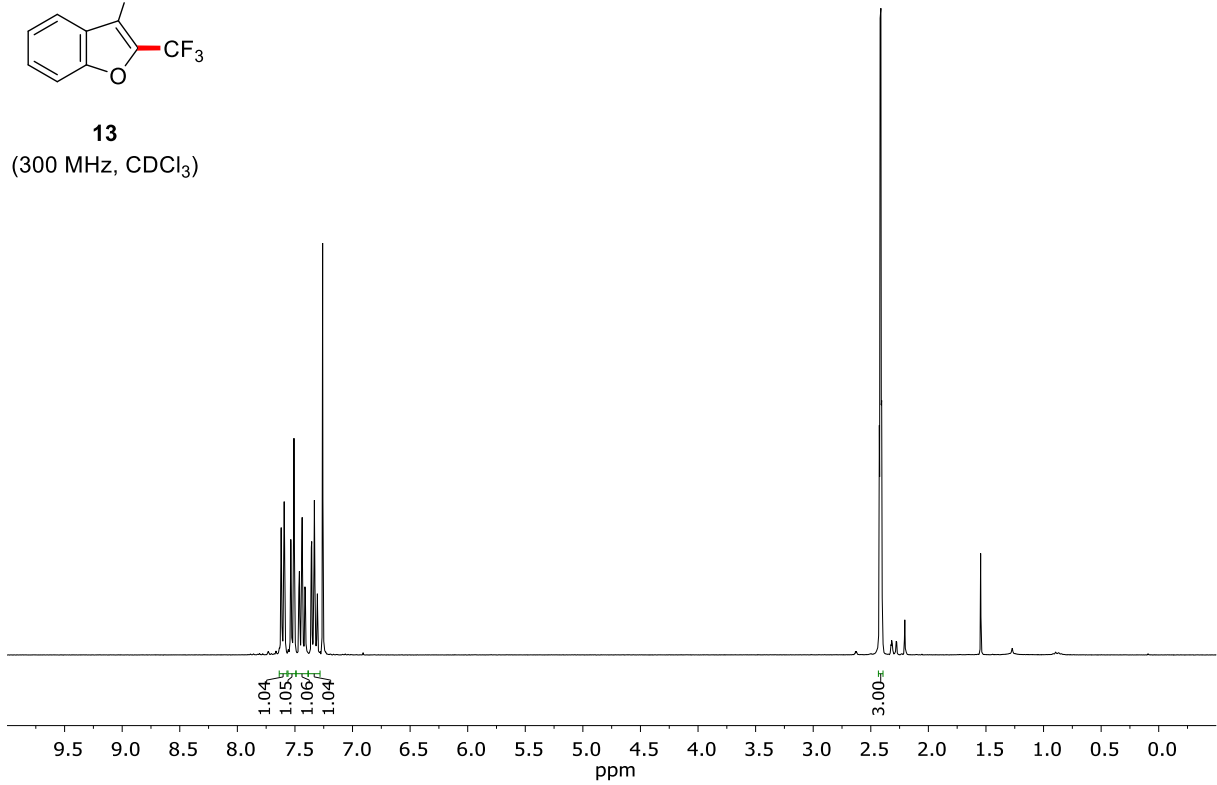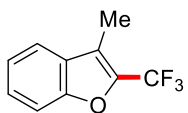

**13**  
(100 MHz, CDCl<sub>3</sub>)

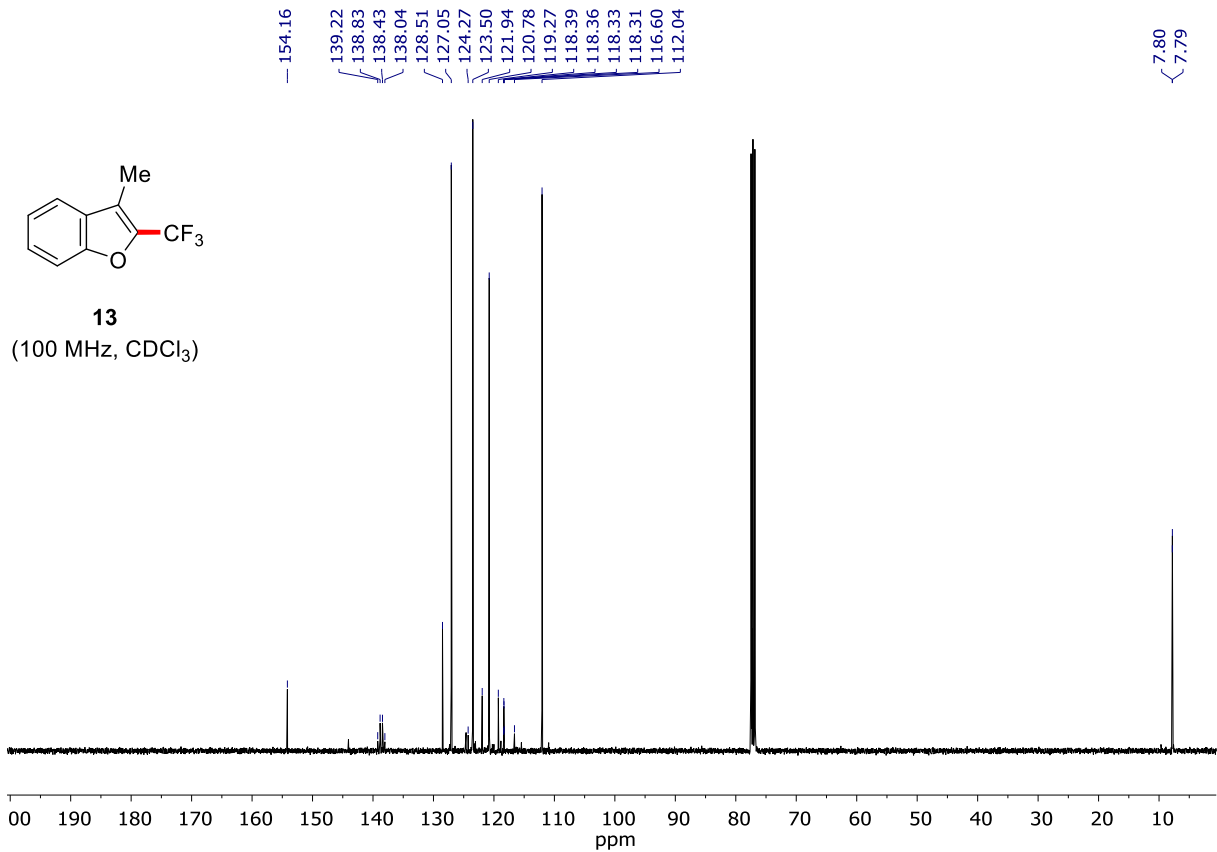

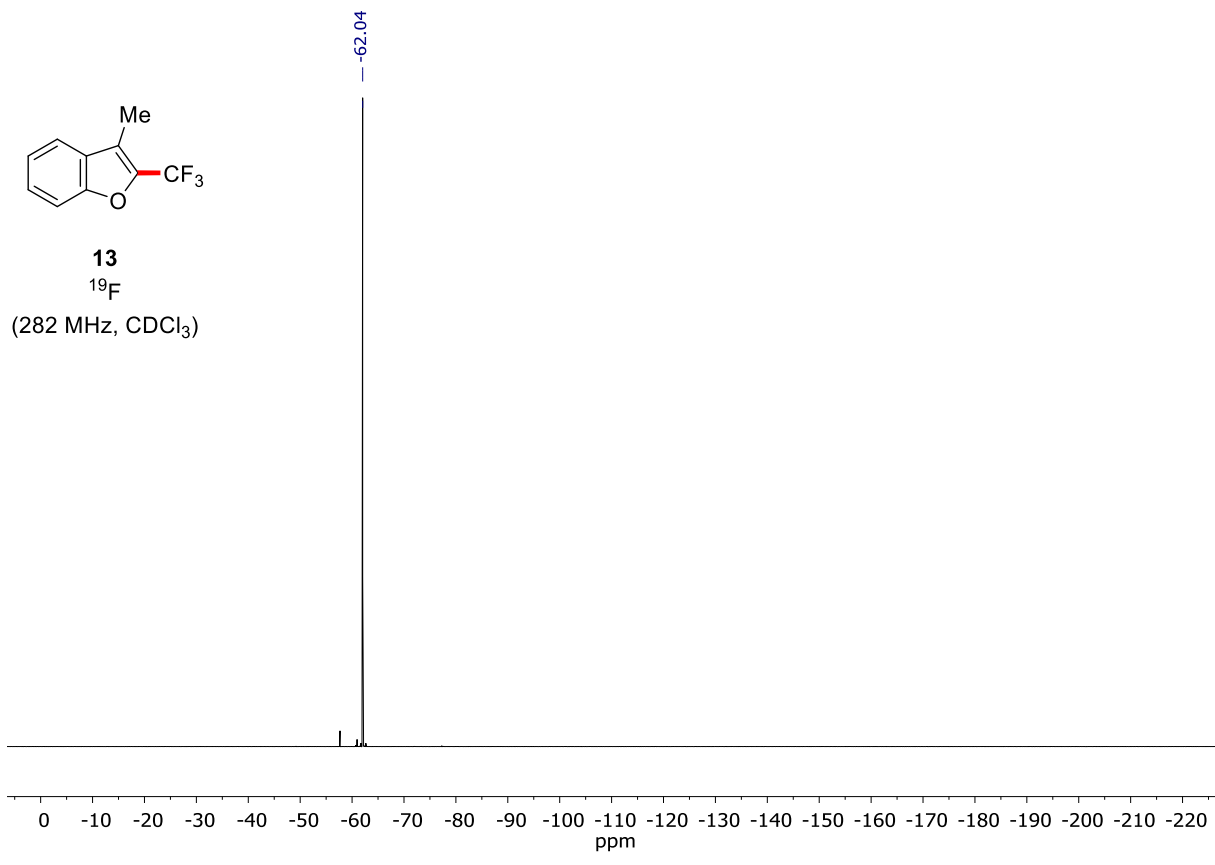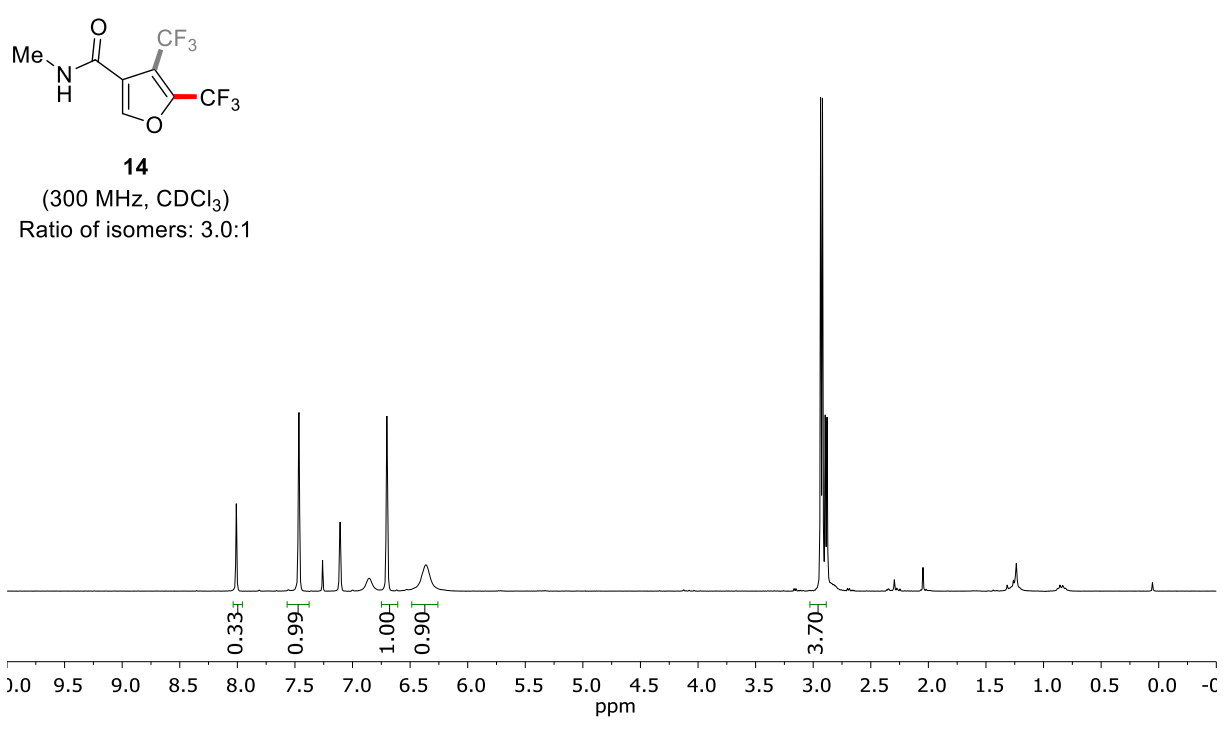

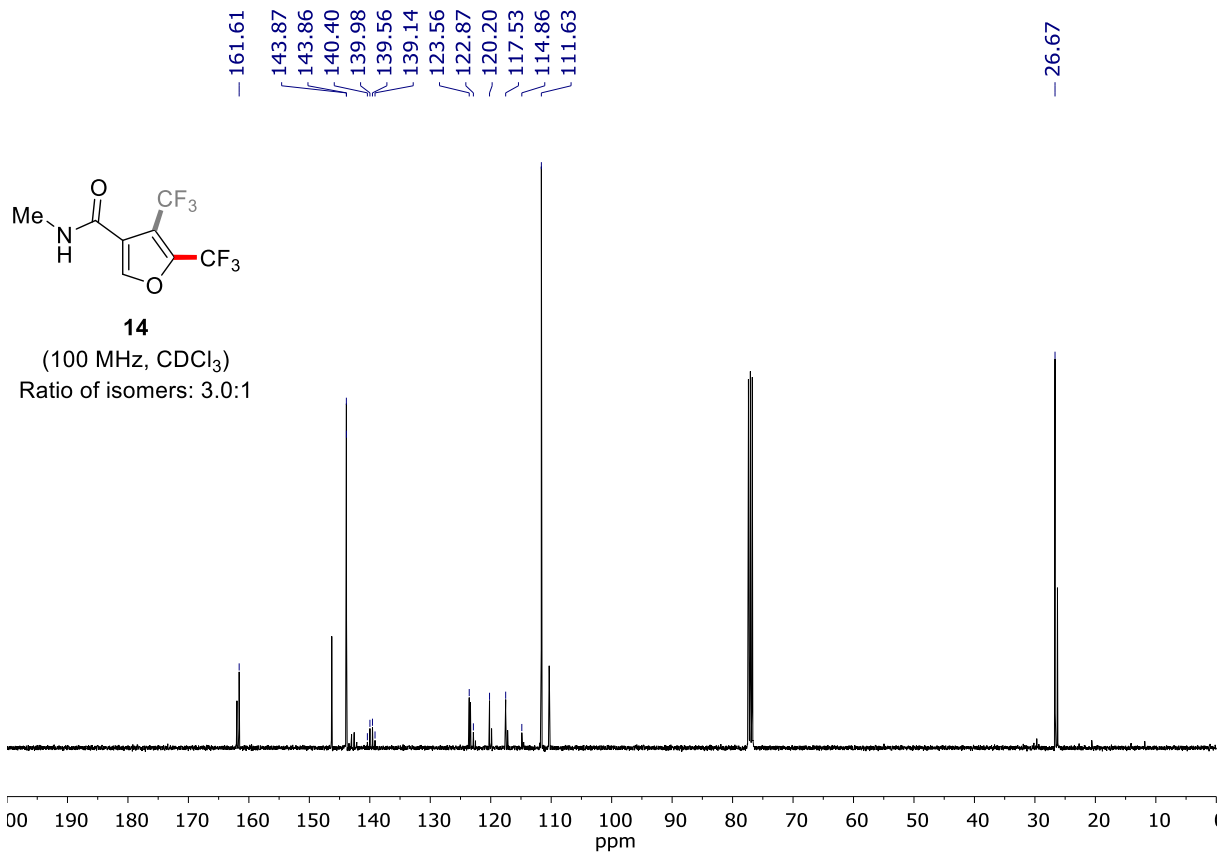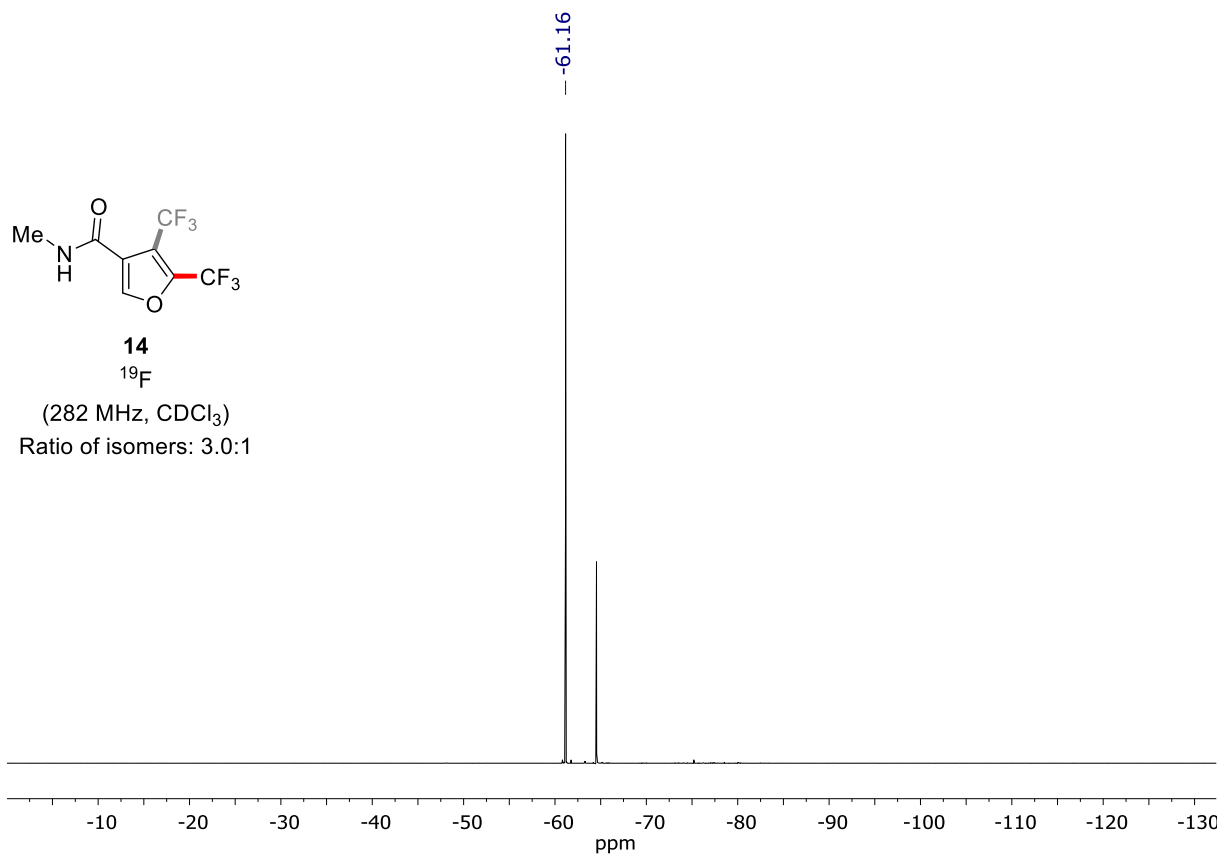



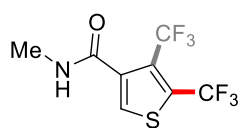

**15**

(400 MHz, CDCl<sub>3</sub>)

Ratio of isomers: 2.7.0:1

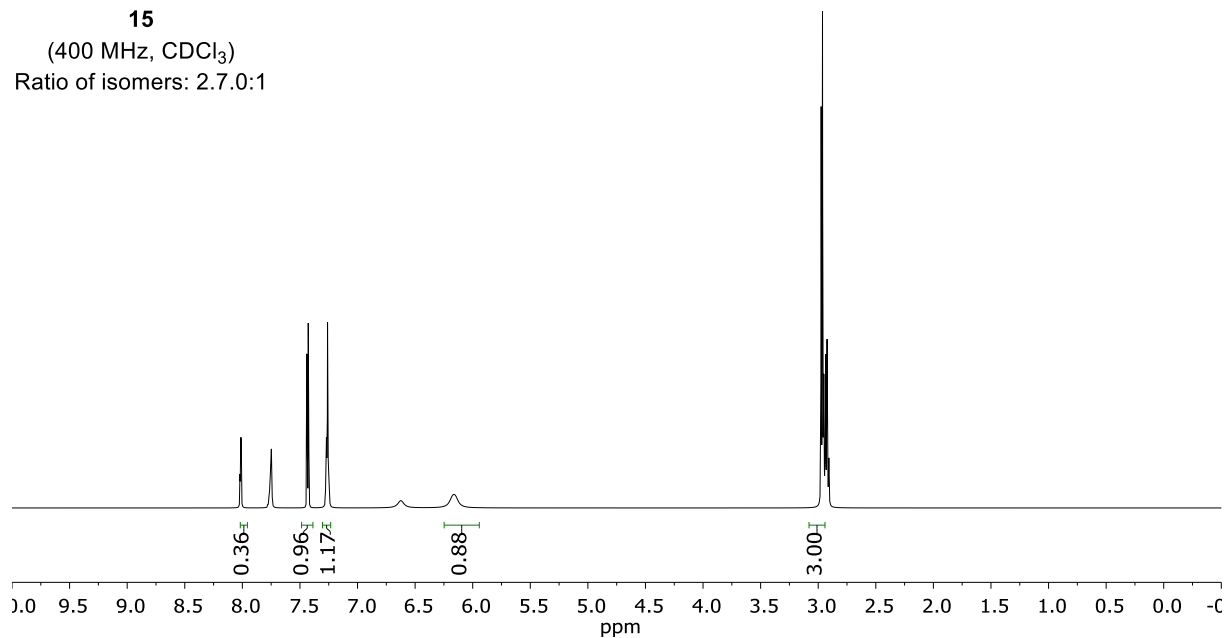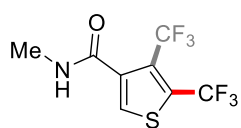

**15**

(100 MHz, CDCl<sub>3</sub>)

Ratio of isomers: 2.7:1

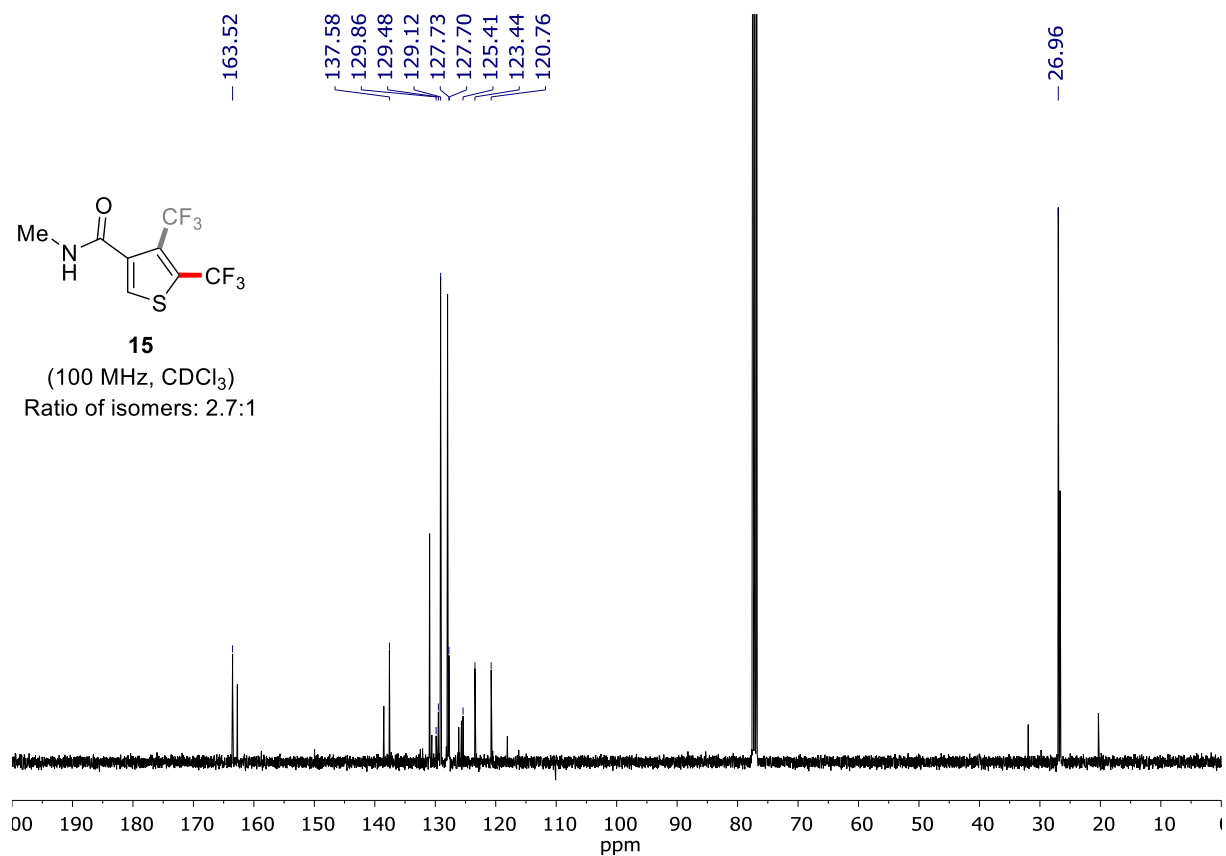

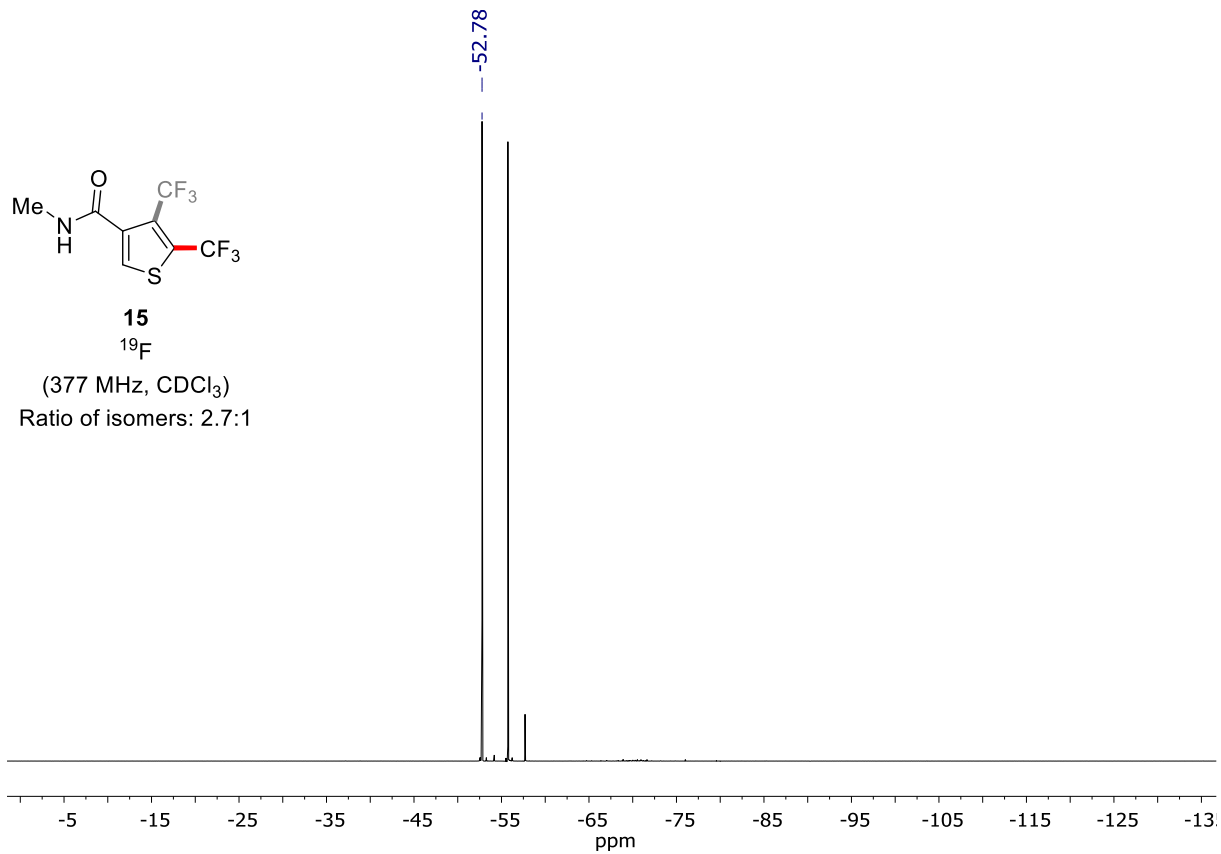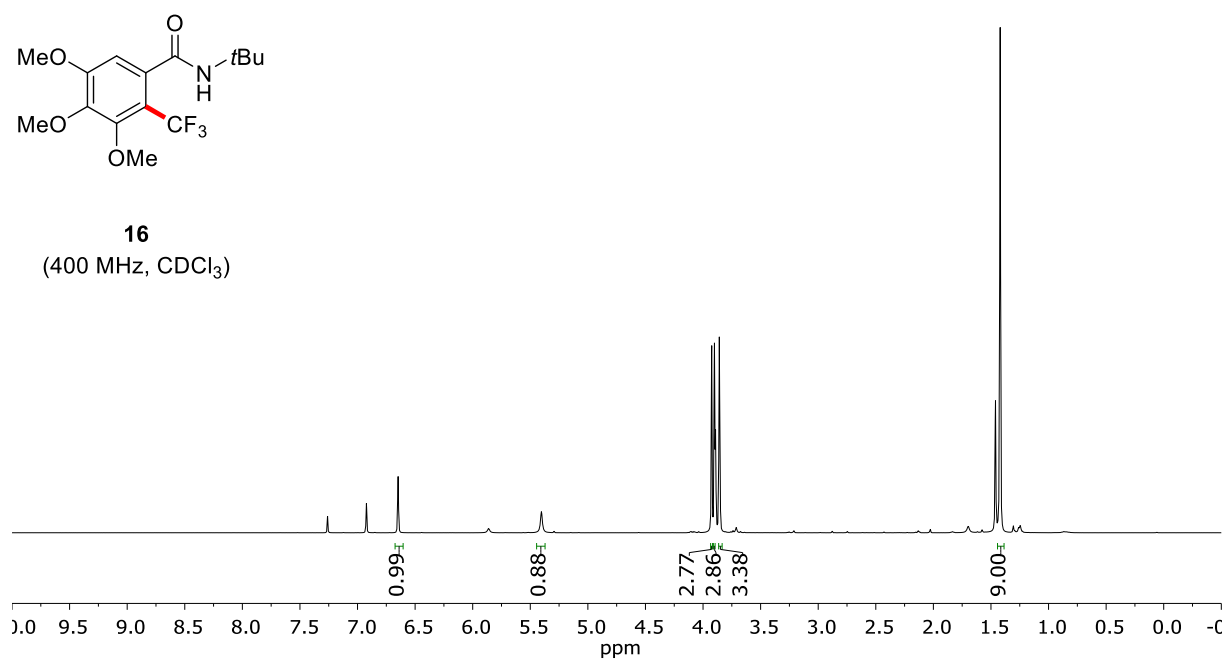

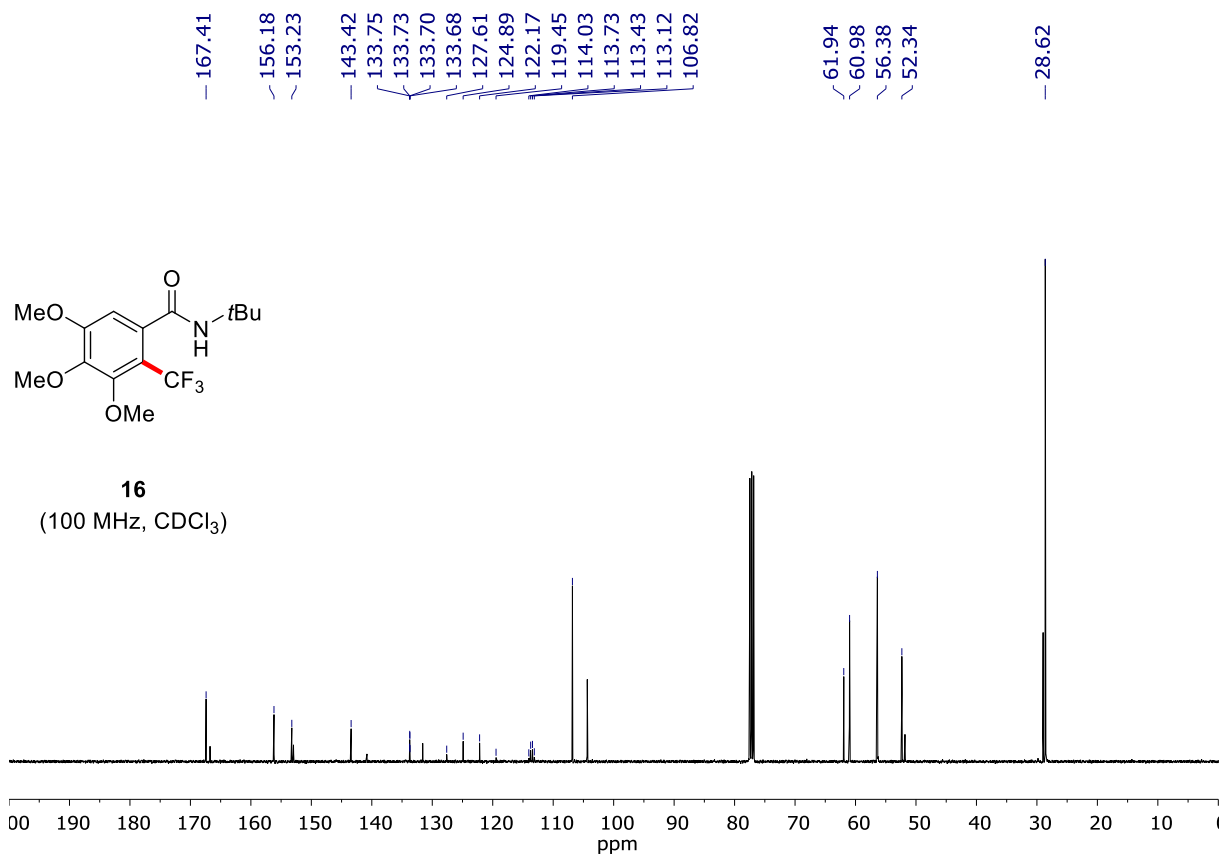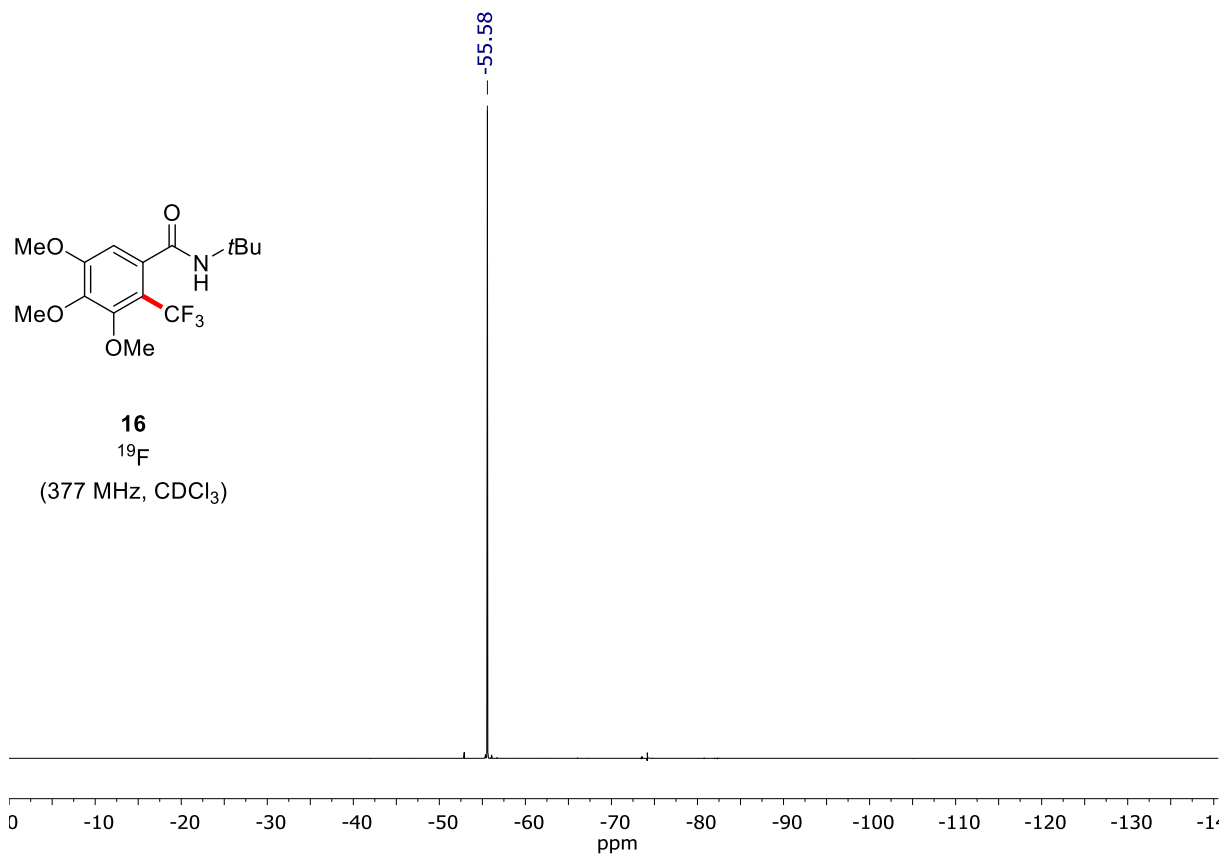

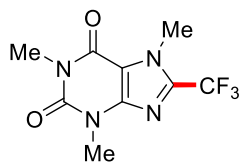

**6**

(400 MHz, CDCl<sub>3</sub>)

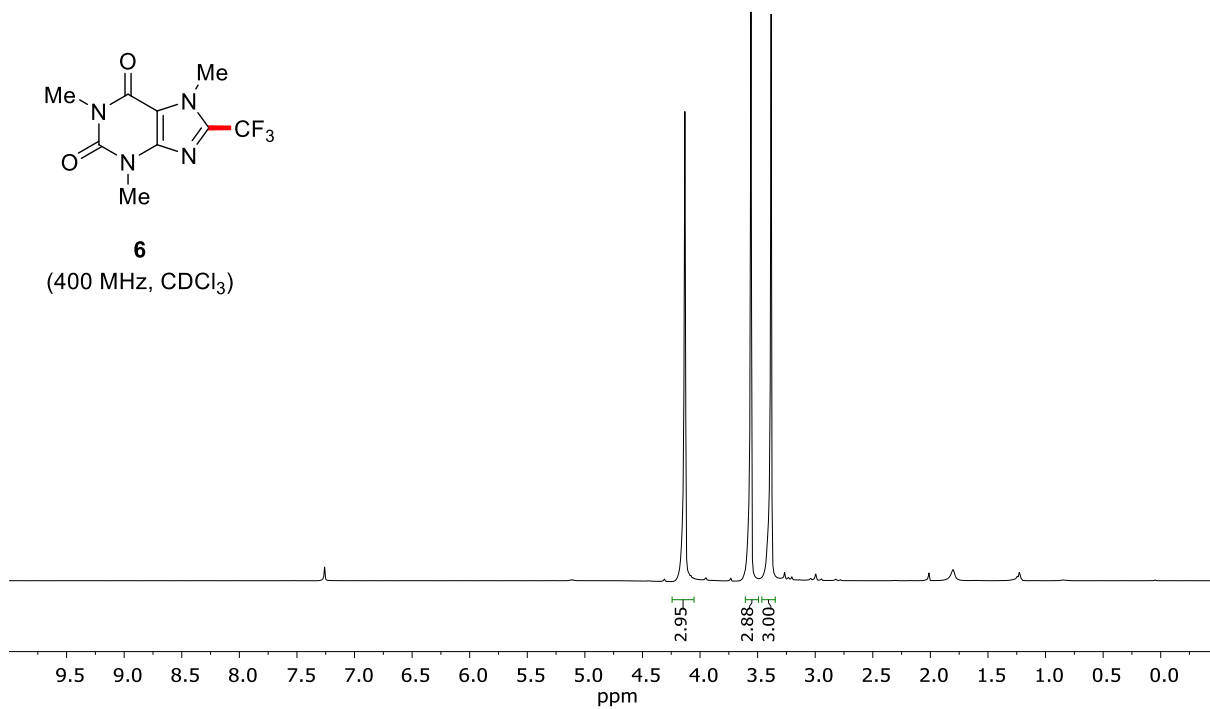

155.53  
151.40  
146.60  
139.58  
139.18  
138.78  
138.39

122.33  
119.63  
116.94  
114.24  
109.73

33.29  
33.27  
29.97  
28.27

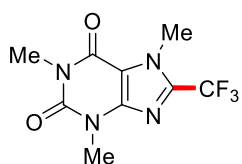

**6**

(100 MHz, CDCl<sub>3</sub>)

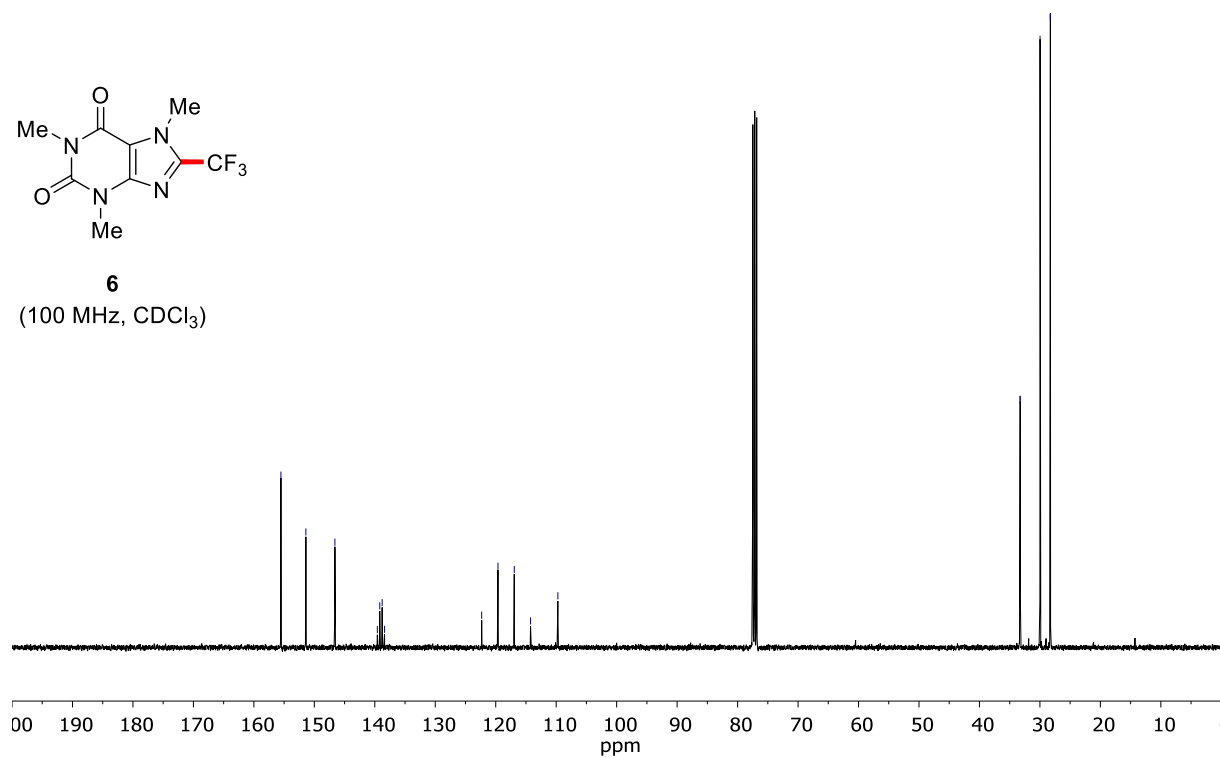

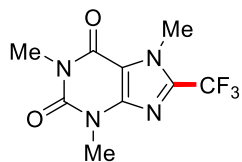

**6**

<sup>19</sup>F

(377 MHz, CDCl<sub>3</sub>)

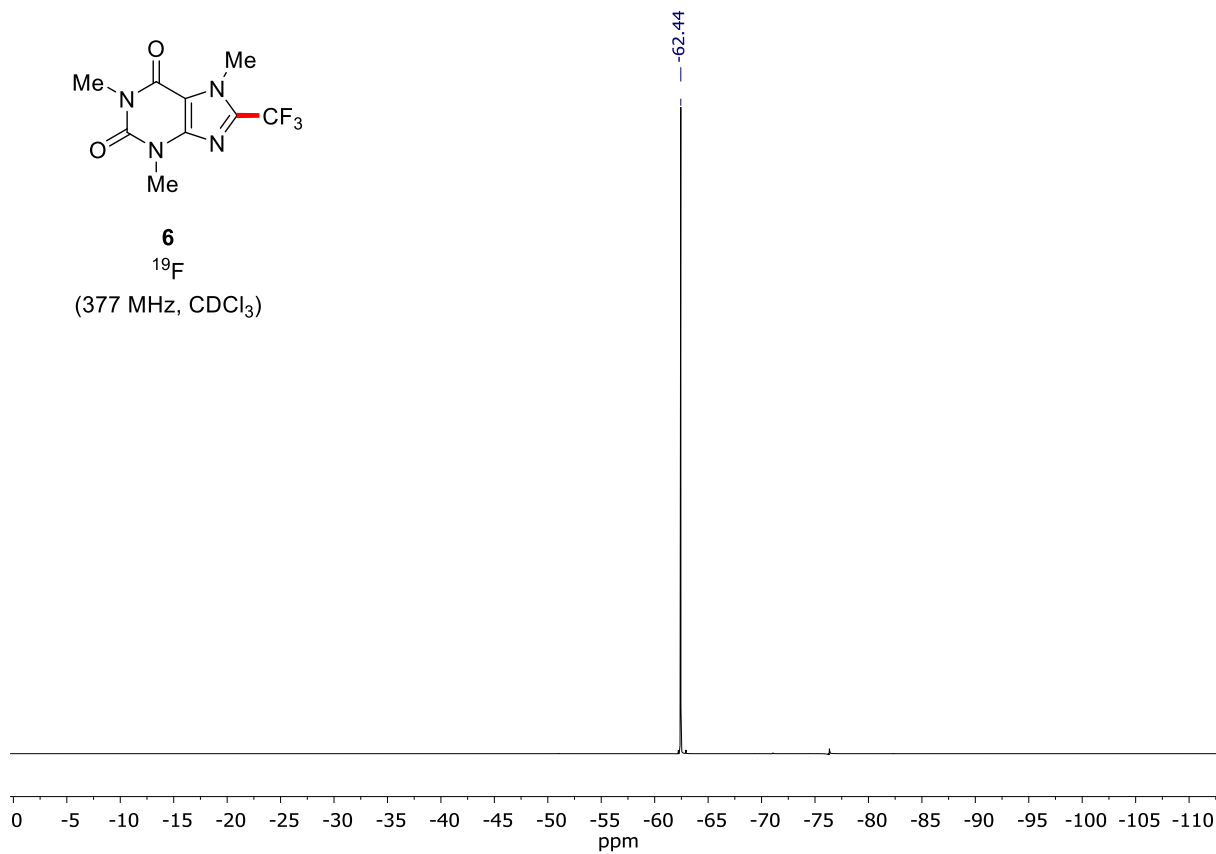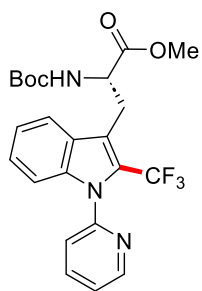

**17**

(400 MHz, CDCl<sub>3</sub>)

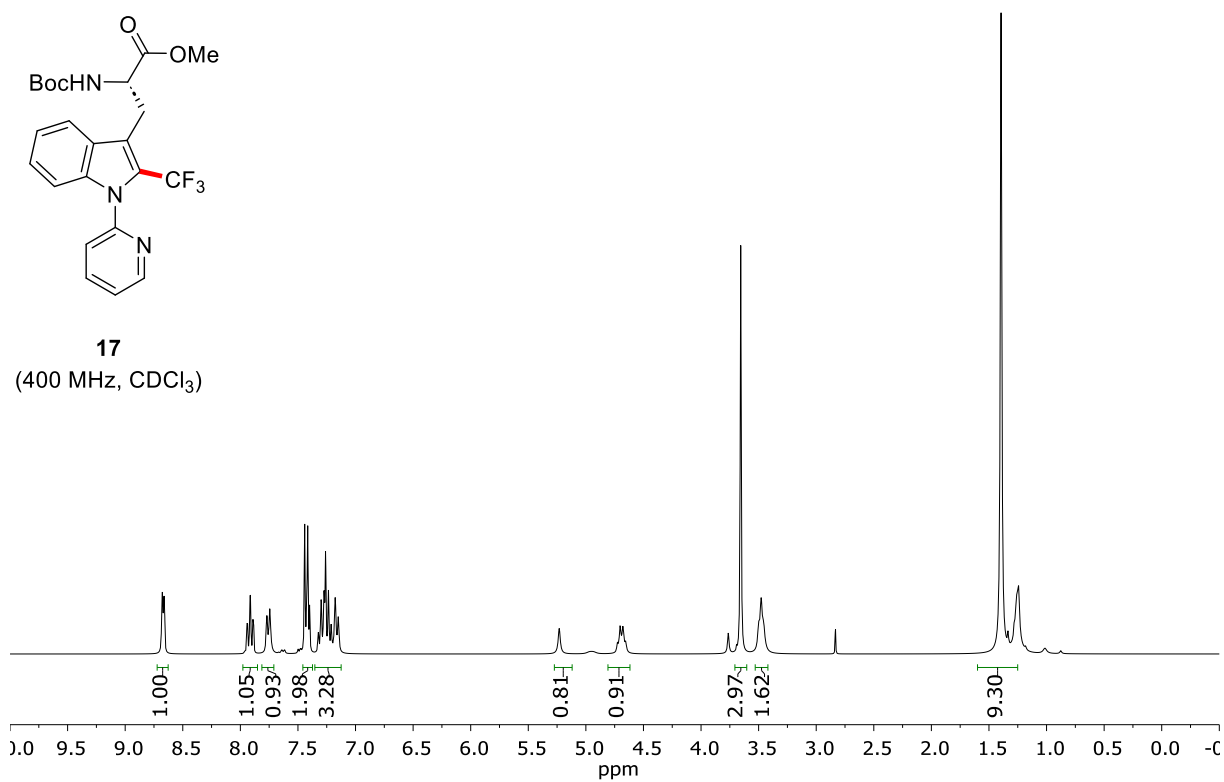

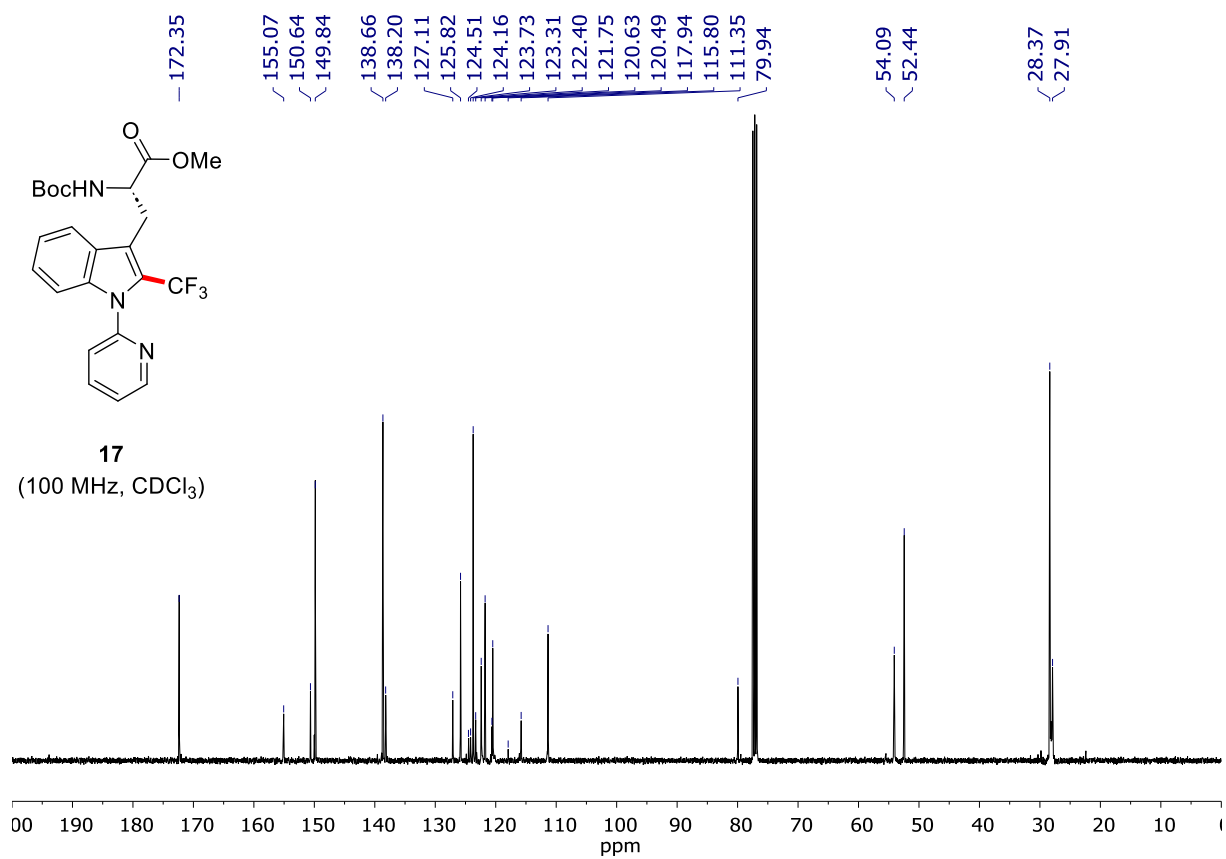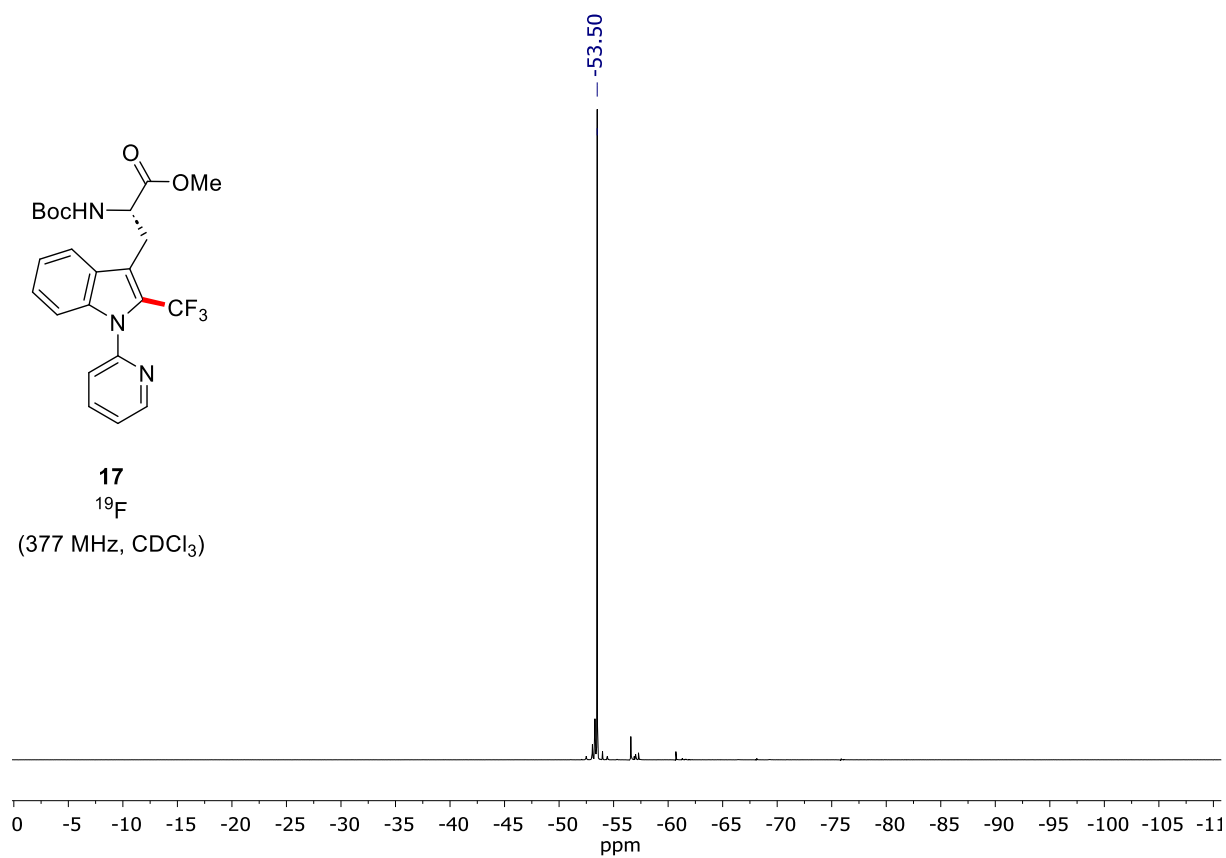

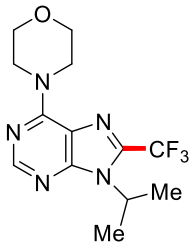

**18**

(400 MHz, CDCl<sub>3</sub>)

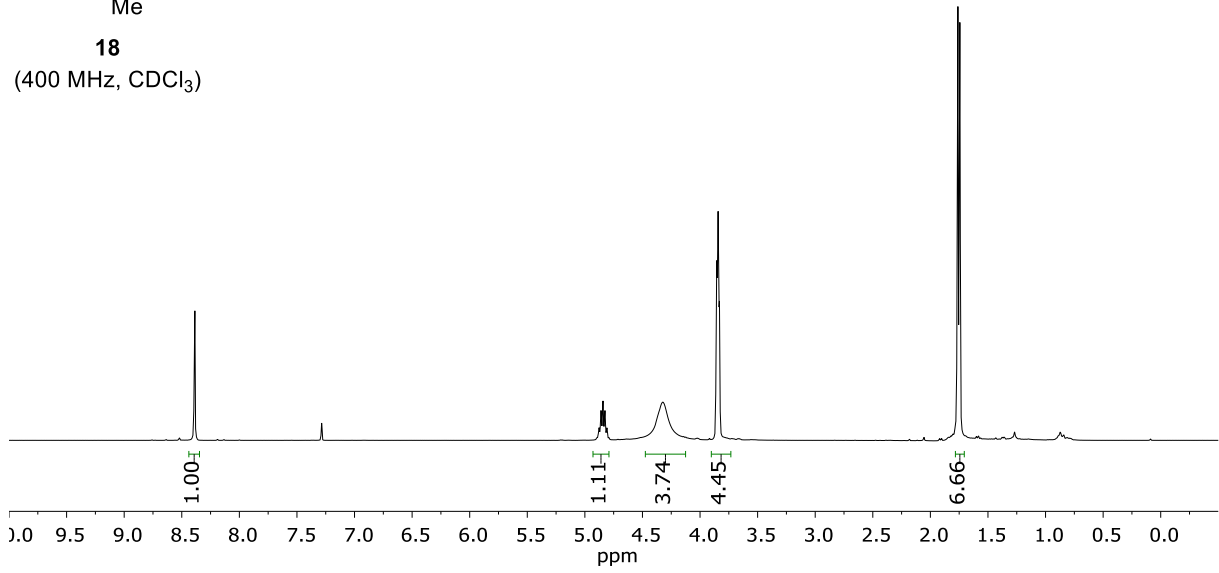

154.68  
153.38  
152.48  
136.49  
136.11  
135.72  
135.33  
123.09  
120.40  
119.40  
117.71  
115.02

-67.16

-50.58

-21.09

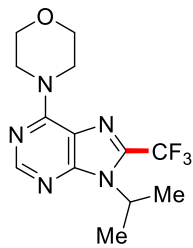

**18**

(100 MHz, CDCl<sub>3</sub>)

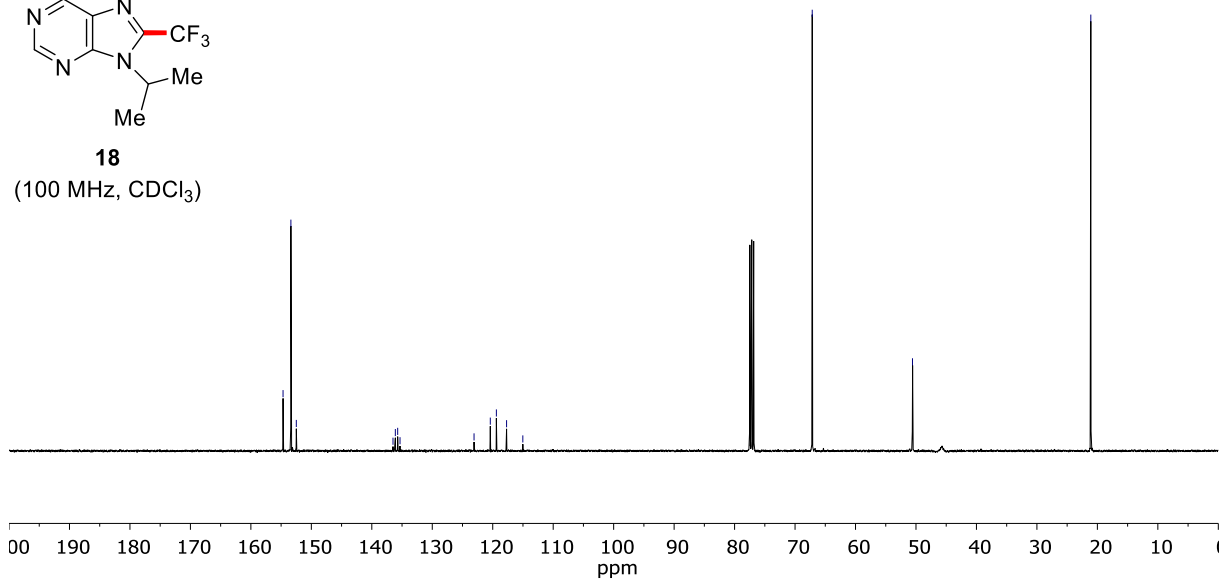

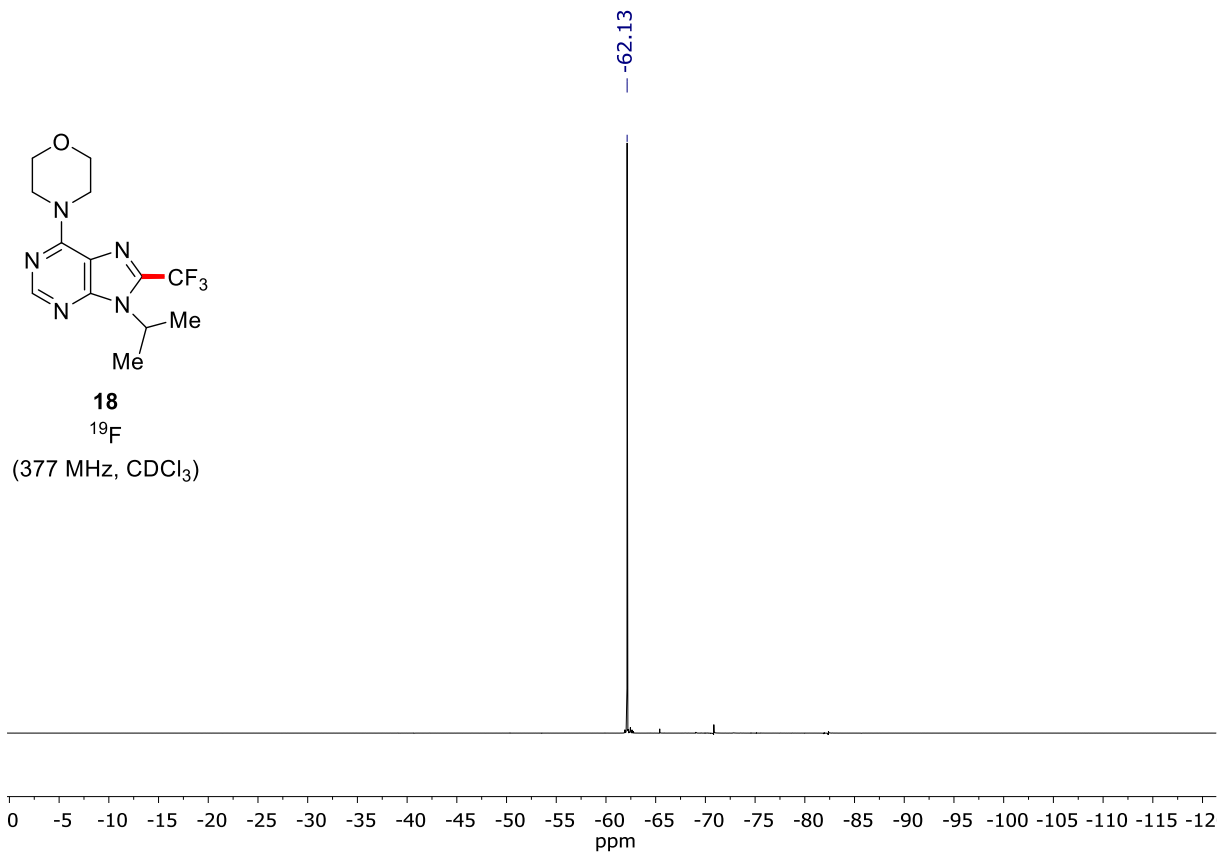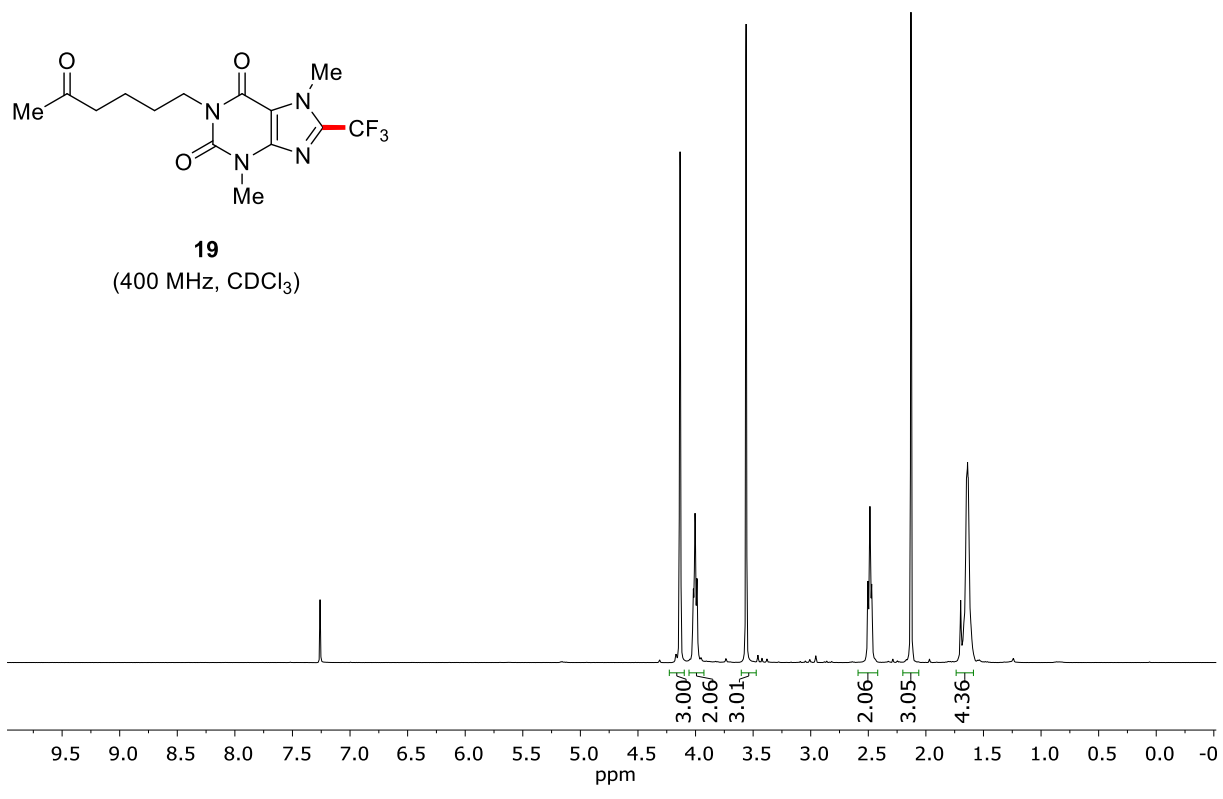



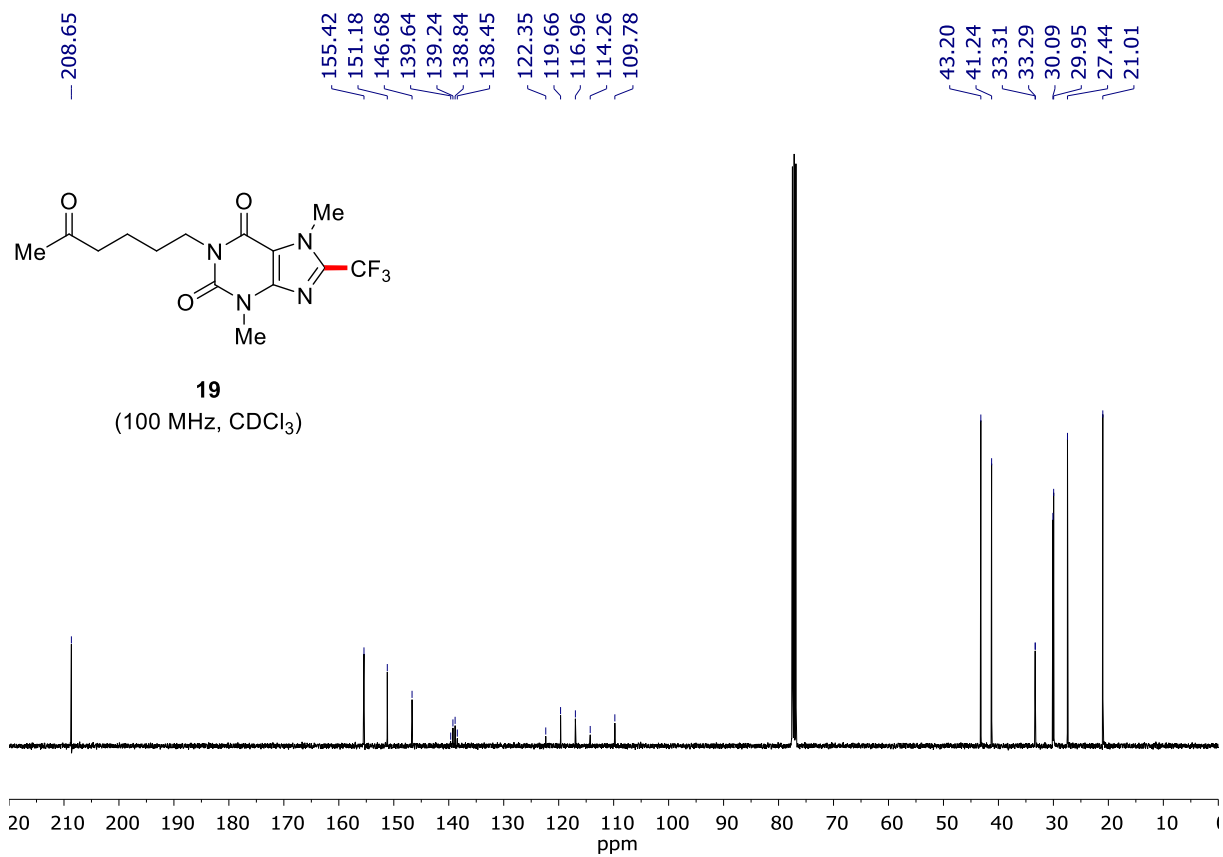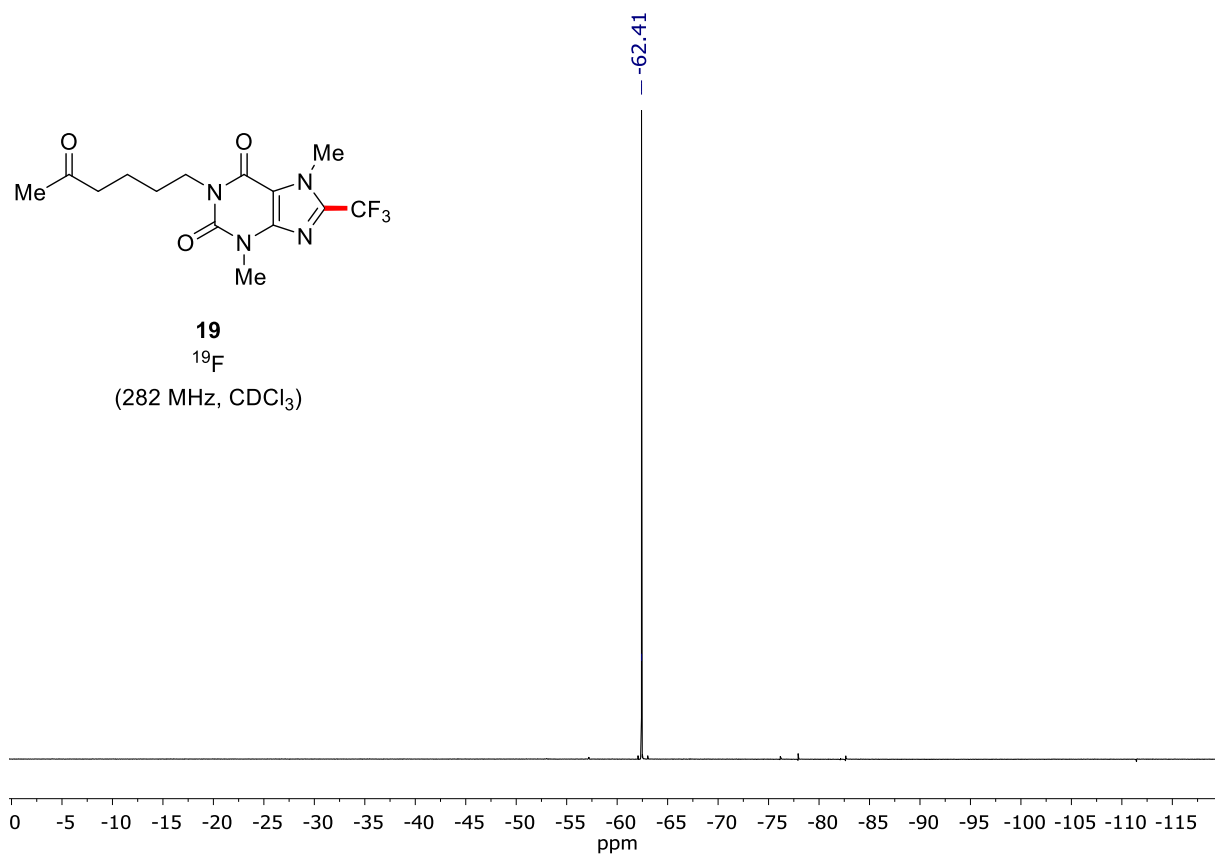

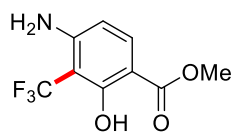

**21a**  
(400 MHz, CDCl<sub>3</sub>)

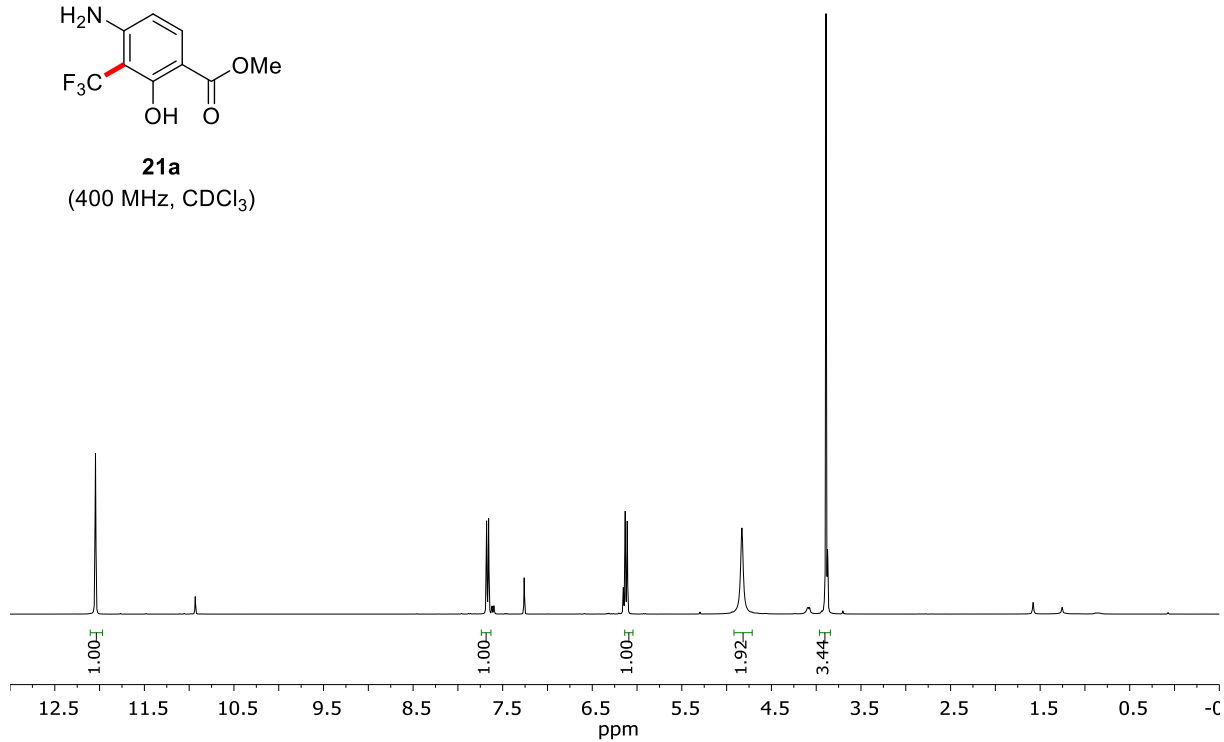

170.54  
163.49  
163.48  
163.46  
163.45  
— 151.25  
133.60  
129.52  
126.80  
124.08  
121.36  
108.38  
102.36  
100.54  
100.24  
99.95  
99.66  
— 52.21

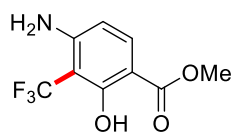

**21a**  
(100 MHz, CDCl<sub>3</sub>)

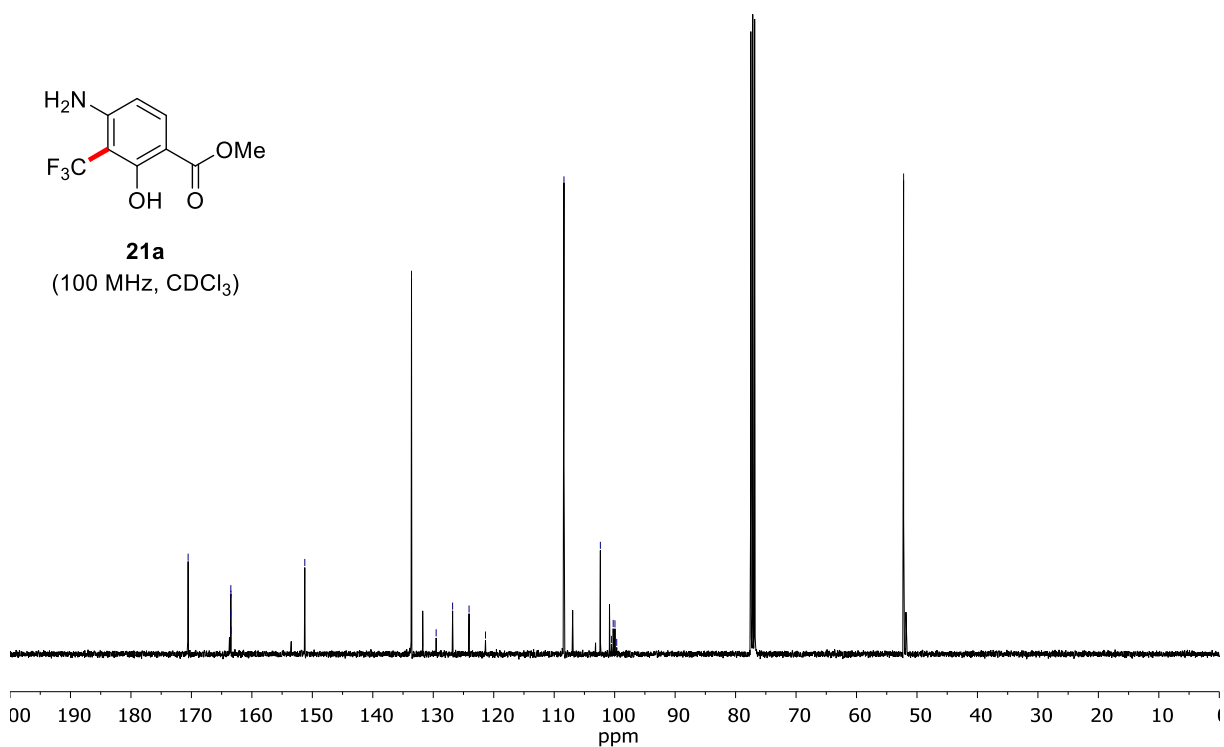

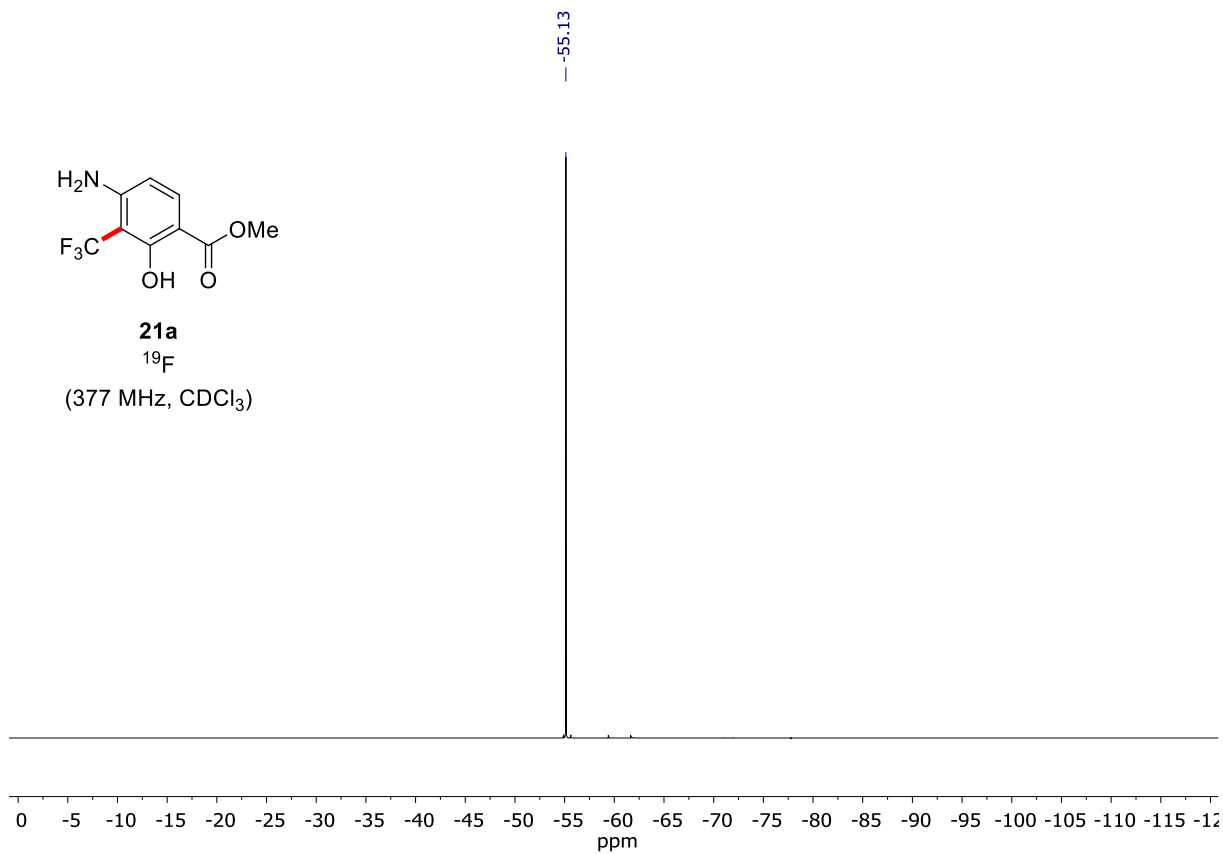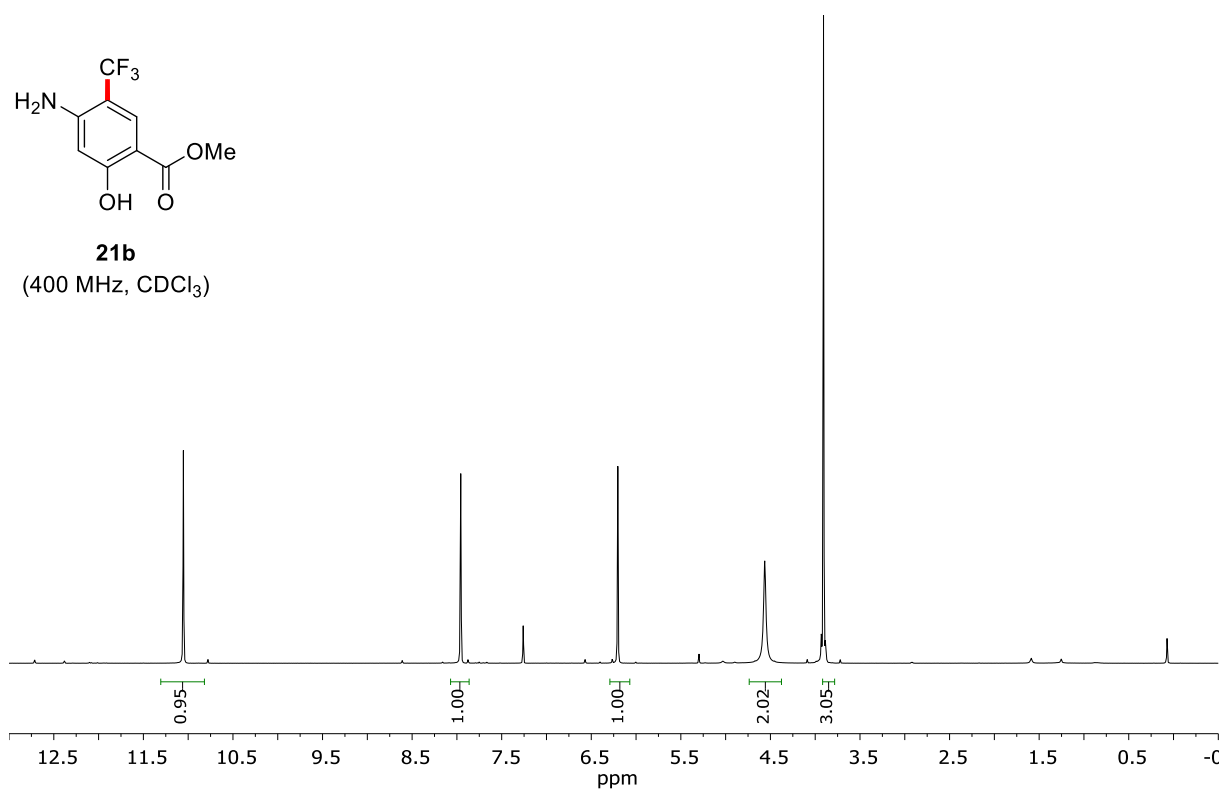

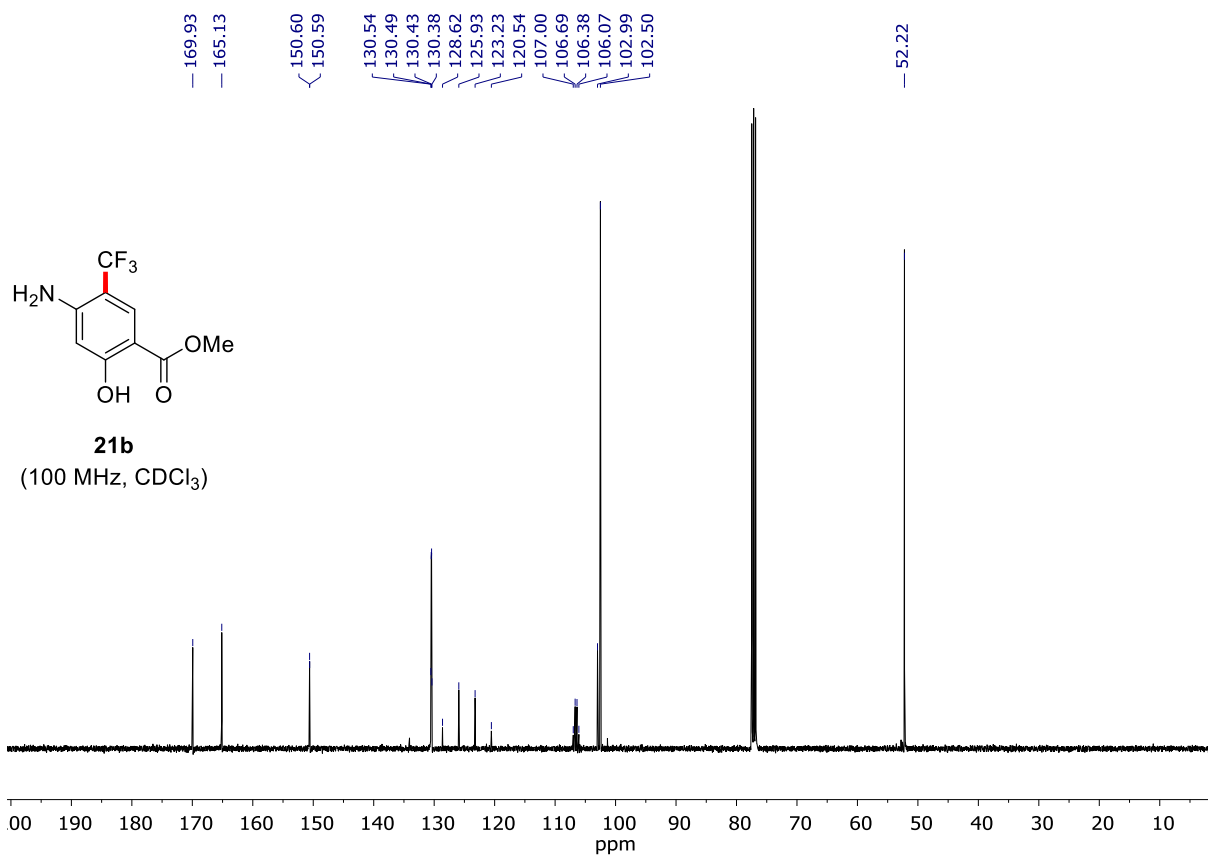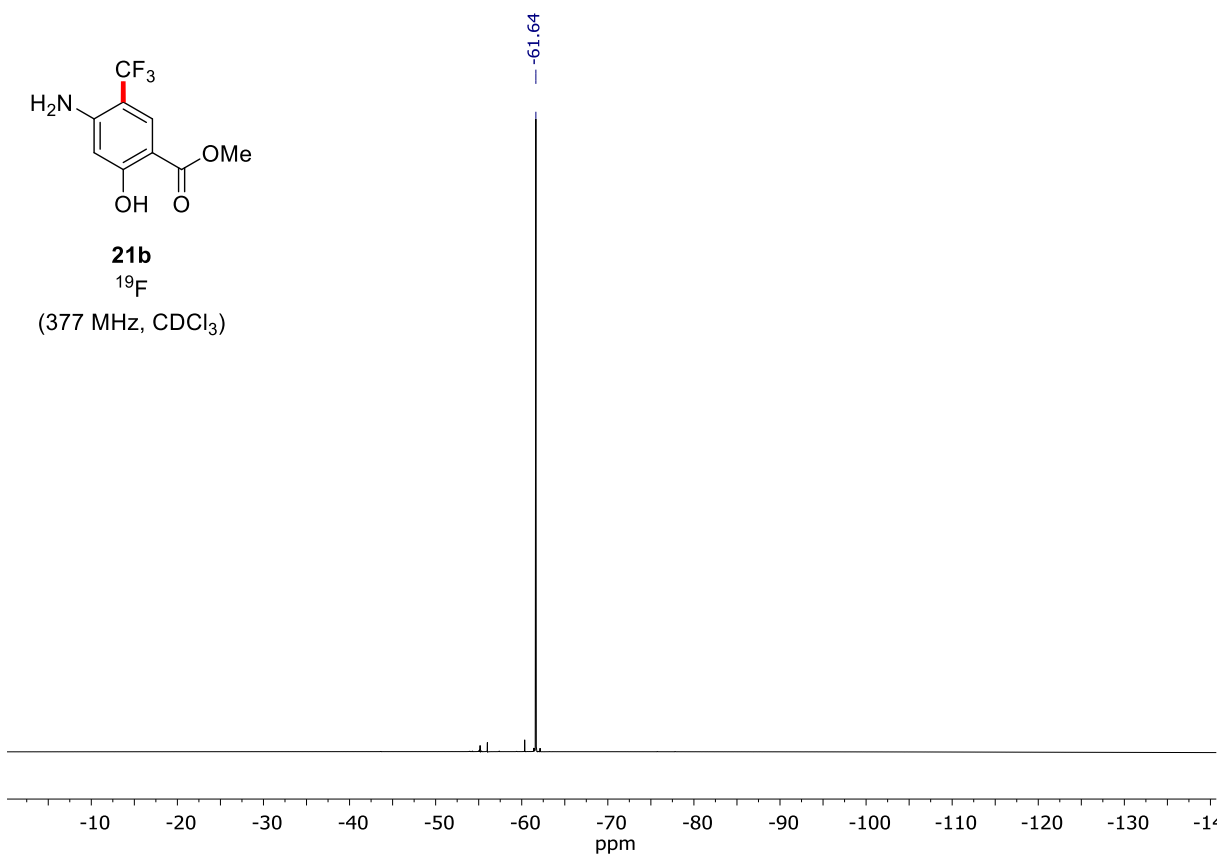

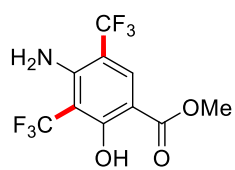

**21c**  
(400 MHz, CDCl<sub>3</sub>)

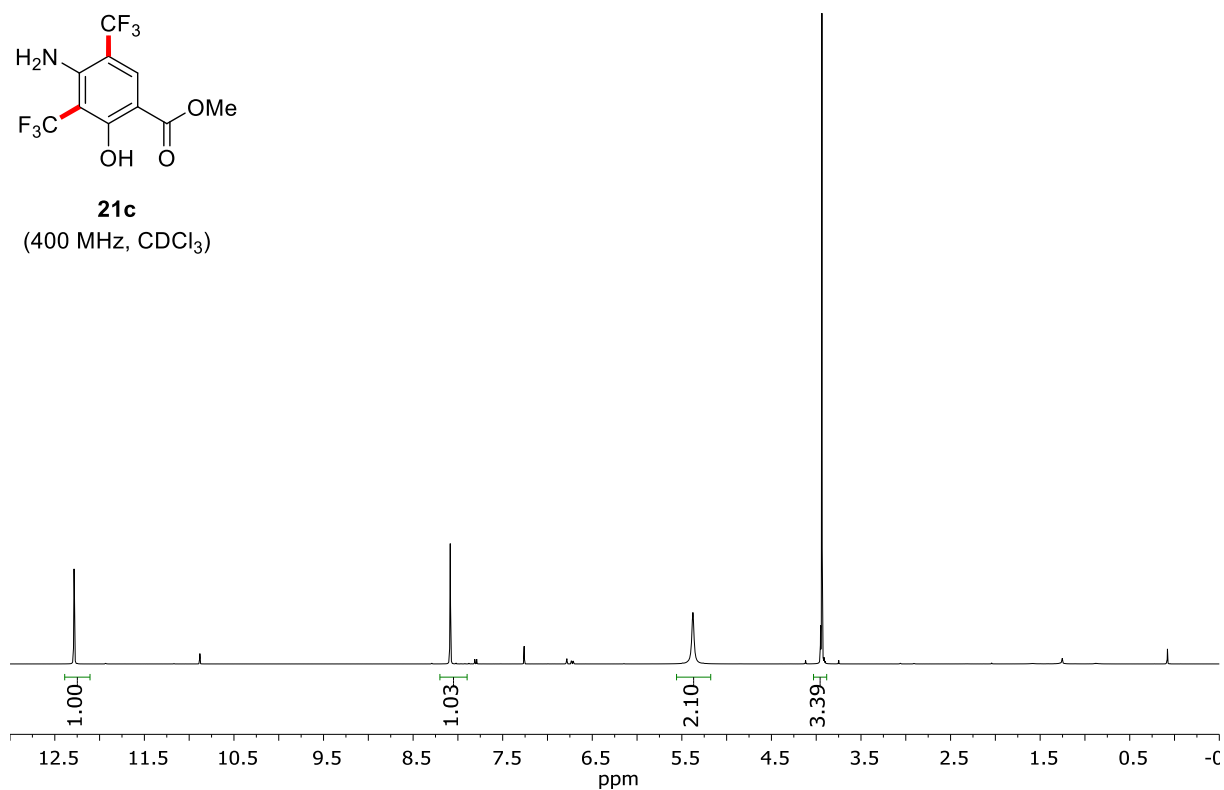

169.93  
165.15  
148.97  
132.78  
132.72  
132.66  
132.61  
128.96  
128.19  
126.23  
125.49  
123.51  
122.80  
120.78  
120.10  
107.29  
106.98  
106.67  
106.36  
101.89  
101.75  
101.46  
101.16  
100.87  
52.66

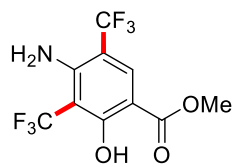

**21c**  
(100 MHz, CDCl<sub>3</sub>)

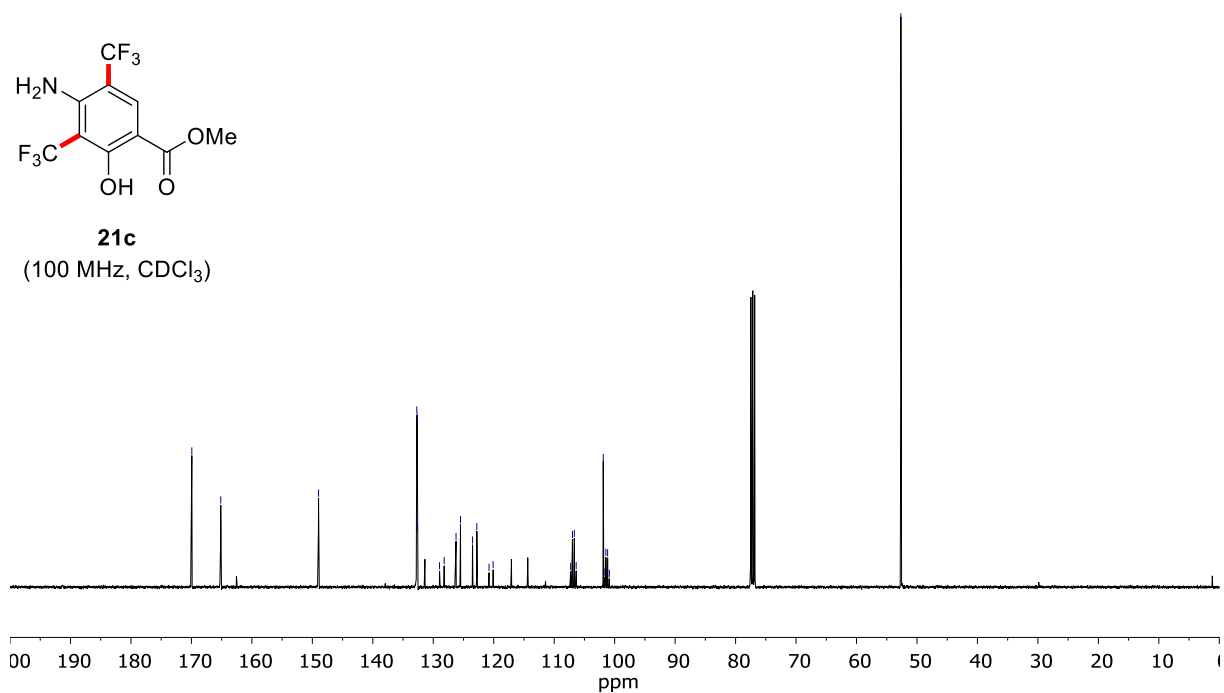

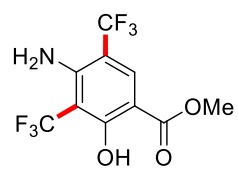

**21c**  
<sup>19</sup>F  
(377 MHz, CDCl<sub>3</sub>)

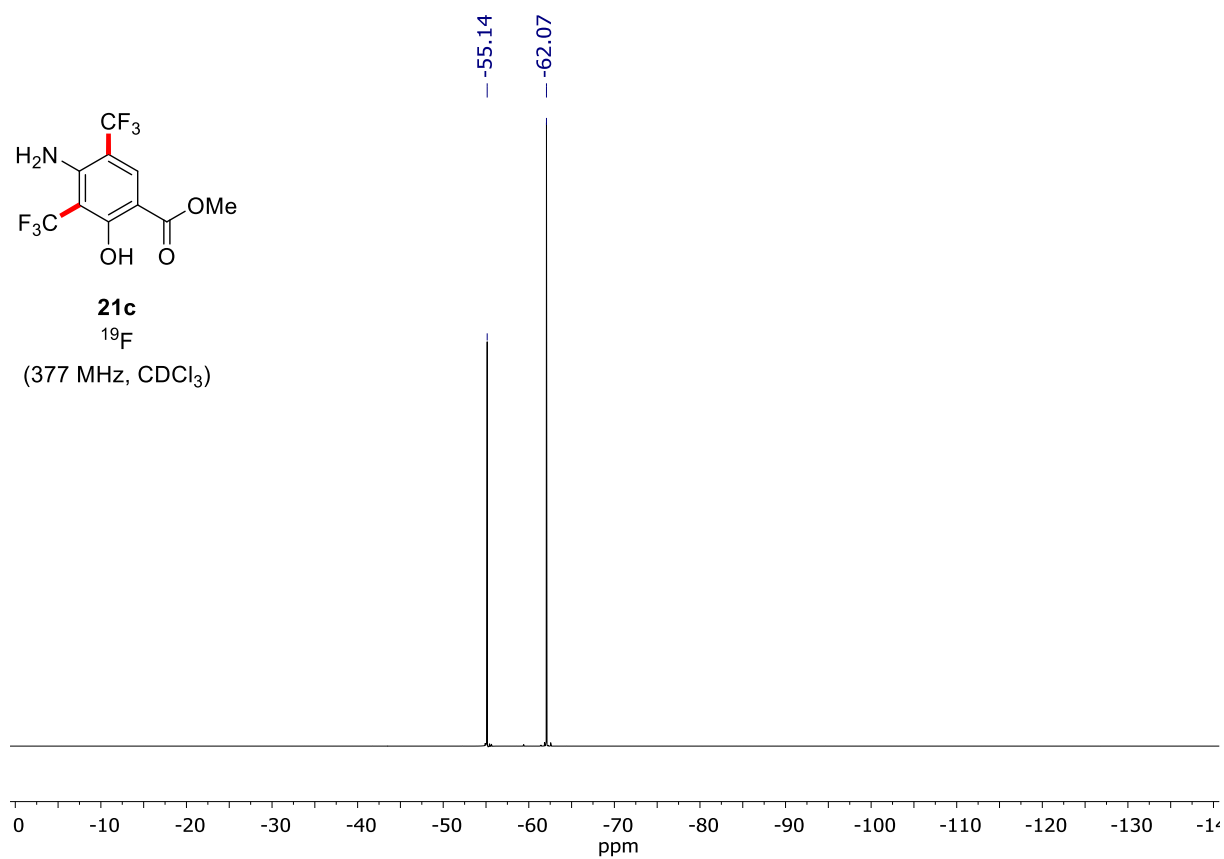

Supplement: d3fd00076a1.pdf [file d3fd00076a1.pdf]
